# Supplementary material for: A Formal Rearrangement of Allylic Silanols
Source: MDPI journal article supplement (doi:10.3390/molecules26133829), 2021-06-23

Supporting Information

**A Formal Rearrangement of Allylic Silanols**

Dr. Ranjeet A. Dhokale, Dr. Frederick J. Seidl, and Professor Shyam Sathyamoorthi

Contents

- I. General Considerations
- II. Characterization of Previously Unreported Substrates
- III. General Procedures for Allylic Rearrangement Reactions
- IV. Characterization of Allylic Rearrangement Products
- V. Dihydroxylation Procedure
- VI. Crystal Structure Data for **18** (CCDC: 2052702)
- VII. Computational Procedures and Atomic Coordinates
- VIII. NMR Spectra

## I. General Considerations:

All reagents were obtained commercially unless otherwise noted. Solvents were purified by passage under 10 psi N<sub>2</sub> through activated alumina columns. Infrared (IR) spectra were recorded on a Thermo Scientific™ Nicolet™ iS™5 FT-IR Spectrometer; data are reported in frequency of absorption (cm<sup>-1</sup>). NMR spectra were recorded on a Bruker Avance 400 operating at 400 and 100 MHz. <sup>1</sup>H NMR spectra were recorded at 400 MHz. Data are recorded as: chemical shift in ppm referenced internally using residue solvent peaks, multiplicity (s = singlet, d = doublet, t = triplet, q = quartet, m = multiplet or overlap of nonequivalent resonances), integration, coupling constant (Hz). <sup>13</sup>C NMR spectra were recorded at 100 MHz. Exact mass spectra were recorded using an electrospray ion source (ESI) either in positive mode or negative mode and with a time-of-flight (TOF) analyzer on a Waters LCT Premier™ mass spectrometer and are given in m/z. TLC was performed on pre-coated glass plates (Merck) and visualized either with a UV lamp (254 nm) or by dipping into a solution of KMnO<sub>4</sub>–K<sub>2</sub>CO<sub>3</sub> in water followed by heating. Flash chromatography was performed on silica gel (230–400 mesh). Reversed phase HPLC was performed on a Hamilton PRP-1.7 μm, 21.2 x 250 mm, C18 column. Hg(OTf)<sub>2</sub> was purchased from either Alfa Aesar or Strem Chemicals. Di-*tert*-butylsilyl Bis(trifluoromethanesulfonate) was purchased from either TCI America or from Sigma-Aldrich.

## II. Characterization of Previously Unreported Substrates

*Note 1: Substrates were synthesized according to previously reported procedures. See Org. Lett. 2020, 22, 21, 8665–8669.*

*Note 2: During ESI-MS, in almost all cases, we observed cleavage of the carbon mercury bond into a carbocation fragment. A representative mass spectrum of this phenomenon is found in Org. Lett. 2020, 22, 21, 8665–8669.*

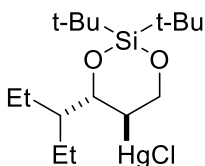

2,2-di-*tert*-butyl-4-(pentan-3-yl)-1,3,2-dioxasilinan-5-ylmercury(II) chloride

**Compound 5:** single *trans* diastereomer; purified using a gradient of 0 to 10% EtOAc in hexanes; (white solid, 17% yield); <sup>1</sup>H NMR (400 MHz, CDCl<sub>3</sub>) δ 4.42 – 4.31 (m, 2H), 4.25 (dd, *J* = 10.9, 4.3 Hz, 1H), 3.11 (ddd, *J* = 12.5, 11.3, 4.2 Hz, 1H), 1.56 – 1.38 (m, 4H), 1.28 (ddq, *J* = 14.5, 9.2, 7.3 Hz, 1H), 0.97 (s, 9H), 0.94 – 0.86 (m, 15H). <sup>13</sup>C NMR (101 MHz, CDCl<sub>3</sub>) δ 67.8, 58.1, 51.9, 27.5, 27.1, 23.0, 22.9, 20.8, 20.0, 12.8, 11.9. IR 2956, 1377, 1067, 782 cm<sup>-1</sup>.

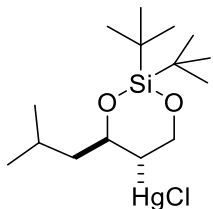

2,2-di-*tert*-butyl-4-isobutyl-1,3,2-dioxasilinan-5-yl)mercury(II) chloride

**Compound 6:** single diastereomer; purified using a gradient of 0 to 10% EtOAc in hexanes; (White solid, 53%);  $^1\text{H}$  NMR (400 MHz, Chloroform-*d*)  $\delta$  4.48 – 4.32 (m, 2H), 4.25 (dd,  $J$  = 11.1, 4.0 Hz, 1H), 2.99 (ddd,  $J$  = 12.8, 11.0, 4.0 Hz, 1H), 2.09 – 1.95 (m, 1H), 1.63 (ddd,  $J$  = 13.2, 10.6, 4.1 Hz, 1H), 1.29 (ddd,  $J$  = 12.9, 9.4, 2.5 Hz, 1H), 1.04 (s, 9H), 0.99 (s, 9H), 0.96 (d,  $J$  = 6.7 Hz, 6H).  $^{13}\text{C}$  NMR (101 MHz, Chloroform-*d*)  $\delta$  74.3, 67.1, 60.6, 50.8, 27.4, 27.0, 24.3, 23.6, 22.8, 21.3, 19.6. IR 2950, 1471, 1075, 650  $\text{cm}^{-1}$ .

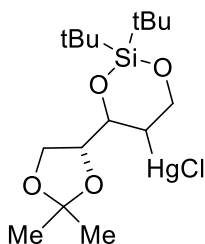

(2,2-di-*tert*-butyl-4-((*R*)-2,2-dimethyl-1,3-dioxolan-4-yl)-1,3,2-dioxasilinan-5-yl)mercury(II) chloride

**Compound 8:** single diastereomer, relative stereochemistry unassigned; purified using a gradient of 0 to 20% EtOAc in hexanes; (clear oil, 30% yield);  $^1\text{H}$  NMR (400 MHz,  $\text{CDCl}_3$ )  $\delta$  4.38 – 4.19 (m, 2H), 4.10 (dd,  $J$  = 9.0, 6.4 Hz, 1H), 4.04 – 3.95 (m, 2H), 3.67 (ddd,  $J$  = 9.2, 6.4, 4.7 Hz, 1H), 2.59 (ddd,  $J$  = 12.6, 11.4, 4.4 Hz, 1H), 1.43 (s, 3H), 1.35 – 1.24 (m, 3H), 0.97 (s, 9H), 0.88 (s, 9H).  $^{13}\text{C}$  NMR (101 MHz,  $\text{CDCl}_3$ )  $\delta$  110.9, 78.9, 78.2, 68.0, 67.4, 53.0, 27.4, 27.1, 27.0, 25.0, 22.8, 19.7. IR 2945, 1382, 1078, 833  $\text{cm}^{-1}$ .

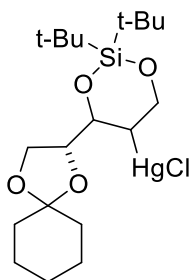

(2,2-di-*tert*-butyl-4-((*R*)-1,4-dioxaspiro[4.5]decan-2-yl)-1,3,2-dioxasilinan-5-yl)mercury(II) chloride

**Compound 9:** single diastereomer, relative stereochemistry unassigned; purified using a gradient of 0 to 20% EtOAc:Hexanes; (white foam, 28% yield);  $^1\text{H}$  NMR (400 MHz,  $\text{CDCl}_3$ )  $\delta$  4.41 (dd,  $J$  = 12.6, 11.3 Hz, 1H), 4.33 (dd,  $J$  = 11.3, 4.3 Hz, 1H), 4.18 (dd,  $J$  = 8.9, 6.3 Hz, 1H), 4.09 (dd,  $J$  = 11.3, 9.1 Hz, 1H), 4.03 (dd,  $J$  = 8.9, 5.5 Hz, 1H), 3.80 – 3.72 (m, 1H), 2.72 (ddd,  $J$  = 12.5, 11.3, 4.4 Hz, 1H), 1.76 (ddd,  $J$  = 15.7, 9.7, 3.3 Hz, 2H), 1.61 (ddd,  $J$  = 23.4, 10.6, 5.0 Hz, 6H), 1.47 –

1.39 (m, 2H), 1.04 (s, 9H), 0.99 (s, 9H).  $^{13}\text{C}$  NMR (101 MHz,  $\text{CDCl}_3$ )  $\delta$  111.7, 79.8, 78.1, 67.8, 67.4, 53.4, 36.5, 34.6, 27.9, 26.2, 24.9, 24.3, 23.7, 22.8, 19.7. IR 2866, 1477, 1047, 829  $\text{cm}^{-1}$ .

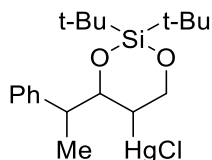

(2,2-di-*tert*-butyl-4-(1-phenylethyl)-1,3,2-dioxasilinan-5-yl)mercury(II) chloride

**Compound 10:** single diastereomer, relative stereochemistry unassigned; purified using a gradient of 0 to 20% EtOAc:Hexanes; (white solid, 67% yield);  $^1\text{H}$  NMR (400 MHz,  $\text{CDCl}_3$ )  $\delta$  7.41 – 7.21 (m, 5H), 4.58 (dd,  $J$  = 11.2, 3.6 Hz, 1H), 4.31 – 4.07 (m, 2H), 3.15 (qd,  $J$  = 7.0, 3.6 Hz, 1H), 2.44 (ddd,  $J$  = 12.5, 11.2, 4.7 Hz, 1H), 1.36 (d,  $J$  = 7.1 Hz, 3H), 1.02 (s, 9H), 0.94 (s, 9H).  $^{13}\text{C}$  NMR (101 MHz,  $\text{CDCl}_3$ )  $\delta$  141.8, 129.5, 128.0, 127.7, 81.7, 67.7, 52.0, 46.2, 27.7, 27.1, 22.6, 20.0, 13.8. IR 2863, 1477, 1060, 772  $\text{cm}^{-1}$ .

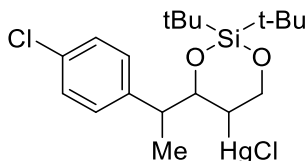

(2,2-di-*tert*-butyl-4-(1-(4-chlorophenyl)ethyl)-1,3,2-dioxasilinan-5-yl)mercury(II) chloride

**Compound 11:** single diastereomer, relative stereochemistry unassigned; purified using a gradient of 0 to 20% EtOAc:hexanes followed by preparative thin layer chromatography (50% DCM:hexanes); (white foam, 40% yield);  $^1\text{H}$  NMR (400 MHz,  $\text{CDCl}_3$ )  $\delta$  7.29 – 7.24 (m, 2H), 7.24 – 7.17 (m, 2H), 4.53 (dd,  $J$  = 11.2, 3.4 Hz, 1H), 4.25 (dd,  $J$  = 12.7, 11.1 Hz, 1H), 4.16 (dd,  $J$  = 11.1, 4.5 Hz, 1H), 3.01 (qd,  $J$  = 7.0, 3.3 Hz, 1H), 2.39 (ddd,  $J$  = 12.6, 11.1, 4.5 Hz, 1H), 1.35 (d,  $J$  = 7.0 Hz, 3H), 1.01 (s, 9H), 0.91 (s, 9H).  $^{13}\text{C}$  NMR (101 MHz,  $\text{CDCl}_3$ )  $\delta$  140.2, 133.4, 129.6, 129.3, 80.9, 67.6, 53.8, 46.7, 27.7, 27.0, 23.1, 20.0, 15.4. IR 2973, 1353, 1229, 1062  $\text{cm}^{-1}$ .

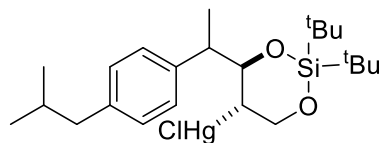

2,2-di-*tert*-butyl-4-((*R*)-1-(4-isobutylphenyl)ethyl)-1,3,2-dioxasilinan-5-ylmercury(II) chloride

**Compound 12:** Single diastereomer, relative stereochemistry unassigned; purified using a gradient of 0 to 10% EtOAc in hexanes; (White solid, 73%);  $^1\text{H}$  NMR (400 MHz, Chloroform-*d*)  $\delta$  7.28 – 7.17 (m, 4H), 4.65 (dd,  $J$  = 11.3, 3.6 Hz, 1H), 4.38 – 4.21 (m, 2H), 3.24 (dd,  $J$  = 7.0, 3.6 Hz, 1H), 2.52 (d,  $J$  = 7.2 Hz, 3H), 1.91 (dt,  $J$  = 13.4, 6.8 Hz, 1H), 1.43 (d,  $J$  = 7.0 Hz, 3H), 1.12 (s, 9H), 1.03 (s, 9H), 0.95 (dd,  $J$  = 6.6, 2.3 Hz, 6H).  $^{13}\text{C}$  NMR (101 MHz, Chloroform-*d*)  $\delta$  141.5, 138.9, 130.4, 127.5, 81.7, 67.7, 51.4, 45.6, 45.0, 30.0, 27.6, 27.0, 23.0, 22.49, 22.42, 20.0, 13.3. IR 3006, 1275, 1057, 750  $\text{cm}^{-1}$ .



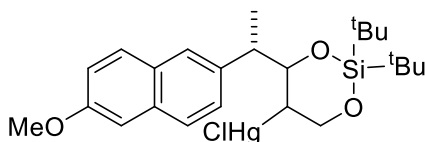

2,2-di-*tert*-butyl-4-((*R*)-1-(6-methoxynaphthalen-2-yl)ethyl)-1,3,2-dioxasilinan-5-ylmercury(II) chloride

**Compound 13:** Single diastereomer but absolute stereochemistry unassigned; purified using a gradient of 0 to 10% EtOAc in hexanes; (White solid, 38%);  $^1\text{H}$  NMR (400 MHz, Chloroform-*d*)  $\delta$  7.84 – 7.64 (m, 3H), 7.46 (dd,  $J$  = 8.4, 1.8 Hz, 1H), 7.25 – 7.13 (m, 2H), 4.75 (dd,  $J$  = 11.1, 3.6 Hz, 1H), 4.38 – 4.17 (m, 2H), 3.95 (s, 3H), 3.38 – 3.26 (m, 1H), 2.51 (ddd,  $J$  = 12.6, 11.1, 4.5 Hz, 1H), 1.54 (d,  $J$  = 7.0 Hz, 3H), 1.14 (s, 9H), 1.06 (s, 9H).  $^{13}\text{C}$  NMR (101 MHz, Chloroform-*d*)  $\delta$  157.8, 137.0, 134.0, 129.3, 129.1, 128.1, 126.7, 126.3, 119.4, 105.7, 81.4, 67.8, 55.3, 52.5, 46.5, 27.7, 27.1, 23.1, 20.0, 14.3. IR 2933, 1605, 1275, 750  $\text{cm}^{-1}$ .

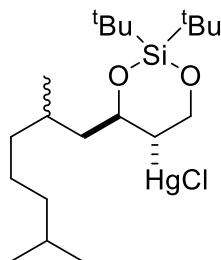

2,2-di-*tert*-butyl-4-(2,6-dimethylheptyl)-1,3,2-dioxasilinan-5-ylmercury(II) chloride

**Compound 14** (*dr* = 1:1): purified using a gradient of 0 to 10% EtOAc in hexanes; (Colorless thick oil, 46%);  $^1\text{H}$  NMR (400 MHz, Chloroform-*d*)  $\delta$  4.46 – 4.34 (m, 2H), 4.25 (dd,  $J$  = 11.2, 4.0 Hz, 1H), 2.99 (ddt,  $J$  = 12.8, 11.0, 4.3 Hz, 1H), 1.88 (m, 1H), 1.74 – 1.58 (m, 1H), 1.56 – 1.48 (m, 1H), 1.46 – 1.38 (m, 1H), 1.31 – 1.14 (m, 6H), 1.04 (s, 9H), 0.99 (s, 9H), 0.94 (dd,  $J$  = 6.7, 2.9 Hz, 3H), 0.88 (d,  $J$  = 6.6 Hz, 6H);  $^{13}\text{C}$  NMR (101 MHz, Chloroform-*d*)  $\delta$  74.4, 73.9, 67.19, 67.16, 60.7, 60.5, 49.3, 48.7, 39.2, 39.0, 37.9, 35.8, 29.3, 28.7, 27.9, 27.8, 27.42, 27.40, 27.2, 27.0, 26.9, 24.7, 22.88, 22.84, 22.7, 22.66, 22.63, 22.5, 20.5, 19.6, 19.1. IR 2929, 1473, 1021, 825, 652  $\text{cm}^{-1}$ .

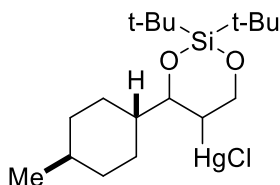

(2,2-di-*tert*-butyl-4-((1*r*,4*r*)-4-methylcyclohexyl)-1,3,2-dioxasilinan-5-ylmercury(II) chloride

**Compound 15:** single diastereomer; purified using a gradient of 0 to 20% EtOAc:hexanes; (white foam, 50% yield);  $^1\text{H}$  NMR (400 MHz,  $\text{CDCl}_3$ )  $\delta$  4.43 (dd,  $J$  = 12.6, 11.0 Hz, 1H), 4.33 (dd,  $J$  = 11.0, 4.3 Hz, 1H), 4.24 (dd,  $J$  = 11.4, 1.8 Hz, 1H), 3.14 (ddd,  $J$  = 12.5, 11.3, 4.3 Hz, 1H), 1.85 – 1.72 (m, 2H), 1.69 – 1.59 (m, 3H), 1.50 – 1.26 (m, 5H), 1.05 (s, 9H), 1.01 (s, 9H), 0.91 (d,  $J$  = 6.6 Hz, 3H).  $^{13}\text{C}$  NMR (101 MHz,  $\text{CDCl}_3$ )  $\delta$  80.0, 67.6, 57.7, 47.7, 35.0, 34.8, 32.6, 30.2, 27.5, 27.1, 25.0, 23.0, 22.5, 20.0. IR 2913, 1465, 1082, 988  $\text{cm}^{-1}$ .

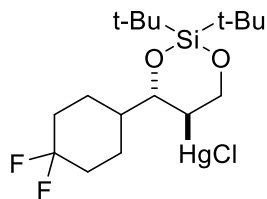

2,2-di-*tert*-butyl-4-(4,4-difluorocyclohexyl)-1,3,2-dioxasilinan-5-ylmercury(II) chloride

**Compound 16:** single diastereomer; purified using a gradient of 0 to 20% EtOAc:hexanes; (white foam, 15% yield);  $^1\text{H}$  NMR (400 MHz,  $\text{CDCl}_3$ )  $\delta$  4.44 (dd,  $J = 12.5, 11.0$  Hz, 1H), 4.39 – 4.26 (m, 2H), 3.12 (ddd,  $J = 12.5, 11.3, 4.3$  Hz, 1H), 2.19 (t,  $J = 15.3$  Hz, 2H), 1.97 (dt,  $J = 15.7, 12.8$  Hz, 1H), 1.87 – 1.63 (m, 5H), 1.51 (m, 1H), 1.03 (d,  $J = 16.8$  Hz, 18H).  $^{13}\text{C}$  NMR (101 MHz,  $\text{CDCl}_3$ )  $\delta$  79.0, 67.4, 57.7, 45.7, 33.89 – 32.82 (m), 27.5, 27.0, 26.5 (d,  $J = 10$  Hz), 23.0, 21.3 (d,  $J = 10$  Hz), 19.9. IR 2866, 1365, 1088, 823, 653  $\text{cm}^{-1}$

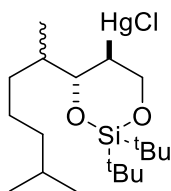

2,2-di-*tert*-butyl-4-(6-methylheptan-2-yl)-1,3,2-dioxasilinan-5-ylmercury(II) chloride

**Compound 17 (Mixture of diastereomers):** purified using a gradient of 0 to 10% EtOAc:hexanes; (Colorless thick oil, 45%);  $^1\text{H}$  NMR (400 MHz, Chloroform-*d*)  $\delta$  4.47 – 4.21 (m, 3H), 3.12 (dddd,  $J = 12.5, 11.1, 8.6, 4.3$  Hz, 1H), 1.65 – 1.56 (m, 1H), 1.55 – 1.50 (m, 1H), 1.46 – 1.30 (m, 2H), 1.29 – 1.14 (m, 3H), 1.08 (d,  $J = 6.7$  Hz, 3H), 1.04 (s, 9H), 1.00 (s, 9H), 0.96 (d,  $J = 6.6$  Hz, 1H), 0.92 – 0.90 (m, 3H), 0.90 – 0.88 (m, 3H).  $^{13}\text{C}$  NMR (101 MHz, Chloroform-*d*)  $\delta$  81.1, 67.6, 57.2, 43.2, 42.6, 39.2, 30.0, 28.0, 27.55, 27.50, 27.0, 25.3, 25.0, 23.0, 22.7, 22.4, 20.0, 16.9, 13.1. IR 2931, 1469, 1064, 824, 651  $\text{cm}^{-1}$ .

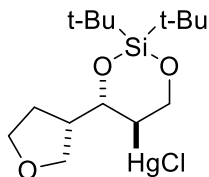

2,2-di-*tert*-butyl-4-(tetrahydrofuran-3-yl)-1,3,2-dioxasilinan-5-ylmercury(II) chloride

**Compound 18:** single diastereomer, relative stereochemistry established by single molecule X-ray diffraction (see Section VI); purified using a gradient of 0 to 20% EtOAc:hexanes; (white solid, 52% yield);  $^1\text{H}$  NMR (400 MHz,  $\text{CDCl}_3$ )  $\delta$  4.33 (ddd,  $J = 11.3, 8.8, 3.8$  Hz, 2H), 4.22 (dd,  $J = 11.2, 4.2$  Hz, 1H), 3.87 – 3.68 (m, 4H), 2.82 (ddd,  $J = 12.5, 11.2, 4.2$  Hz, 1H), 2.44 – 2.30 (m, 1H), 2.03 – 1.86 (m, 2H), 1.04 – 0.86 (m, 18H).  $^{13}\text{C}$  NMR (101 MHz,  $\text{CDCl}_3$ )  $\delta$  78.4, 69.1, 68.6, 67.3, 56.9, 47.9, 29.3, 27.5, 27.1, 22.9, 19.9. IR 2855, 1459, 1071, 829  $\text{cm}^{-1}$ .

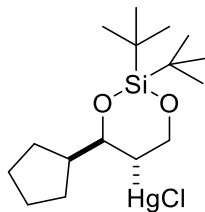

2,2-di-*tert*-butyl-4-cyclopentyl-1,3,2-dioxasilinan-5-yl)mercury(II) chloride

**Compound 20:** single diastereomer; purified using a gradient of 0 to 10% EtOAc:hexanes; (White solid, 30%);  $^1\text{H}$  NMR (400 MHz, Chloroform-*d*)  $\delta$  4.39 – 4.14 (m, 3H), 2.96 (ddd,  $J = 12.7, 11.1, 4.2$  Hz, 1H), 1.94 (dt,  $J = 7.8, 4.0$  Hz, 1H), 1.72 – 1.62 (m, 1H), 1.52-1.61 (m, 5H), 1.48-1.42 (m, 2H), 0.97 (s, 9H), 0.92 (s, 9H);  $^{13}\text{C}$  NMR (101 MHz, Chloroform-*d*)  $\delta$  78.5, 67.4, 59.0, 49.4, 29.7, 27.5, 27.1, 26.1, 25.8, 20.0. IR 2857, 1473, 1056, 825  $\text{cm}^{-1}$ .

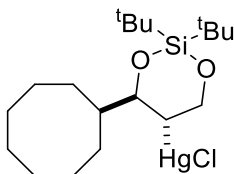

2,2-di-*tert*-butyl-4-cyclooctyl-1,3,2-dioxasilinan-5-yl)mercury(II) chloride

**Compound 21:** single diastereomer; purified using a gradient of 0 to 10% EtOAc:hexanes; (White solid, 24%);  $^1\text{H}$  NMR (400 MHz, Chloroform-*d*)  $\delta$  4.48 – 4.19 (m, 3H), 3.16 (ddd,  $J = 12.6, 11.2, 4.4$  Hz, 1H), 1.85-1.75 (m, 2H), 1.75 – 1.59 (m, 7H), 1.58 – 1.48 (m, 6H), 1.06 (s, 9H), 1.02 (s, 9H).  $^{13}\text{C}$  NMR (101 MHz, Chloroform-*d*)  $\delta$  82.4, 67.7, 57.6, 47.4, 32.0, 27.5, 27.1, 27.0, 26.8, 26.7, 26.5, 26.1, 25.7, 23.0, 20.0. IR 2928, 1473, 1071, 825, 764, 651  $\text{cm}^{-1}$ .

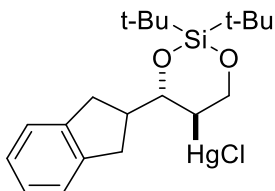

2,2-di-*tert*-butyl-4-(2,3-dihydro-1*H*-inden-2-yl)-1,3,2-dioxasilinan-5-yl)mercury(II) chloride

**Compound 22:** single diastereomer; Purified using preparative TLC with 20% EtOAc:Hex; (colorless oil, 35% yield);  $^1\text{H}$  NMR (400 MHz,  $\text{CDCl}_3$ )  $\delta$  7.18 – 7.03 (m, 4H), 4.43 (dd,  $J = 11.2, 3.5$  Hz, 1H), 4.36 (dd,  $J = 12.6, 11.1$  Hz, 1H), 4.27 – 4.21 (m, 1H), 3.14 – 2.79 (m, 5H), 2.65 – 2.57 (m, 1H), 0.97 (s, 9H), 0.89 (s, 9H).  $^{13}\text{C}$  NMR (101 MHz,  $\text{CDCl}_3$ )  $\delta$  142.9, 142.4, 126.4, 126.3, 124.6, 124.3, 77.9, 67.4, 57.8, 49.7, 35.6, 32.8, 27.6, 27.1, 23.0, 20.0. IR 2940, 2852, 1468, 1048, 744  $\text{cm}^{-1}$ .

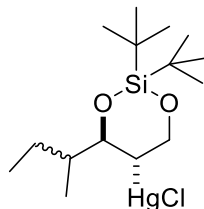

4-(*sec*-butyl)-2,2-di-*tert*-butyl-1,3,2-dioxasilinan-5-yl)mercury(II) chloride

**Compound 23 (Mixture of diastereomers):** purified using a gradient of 0 to 10% EtOAc:hexanes; (Colorless oil, 49%);  $^1\text{H}$  NMR (400 MHz, Chloroform-*d*)  $\delta$  4.48 – 4.21 (m, 3H), 3.19 – 3.06 (m, 1H), 1.52 (s, 1H), 1.46 – 1.28 (m, 1H), 1.08 (d,  $J$  = 6.6 Hz, 2H), 1.04 (s, 9H), 1.00 (d,  $J$  = 1.3 Hz, 9H), 0.98 – 0.94 (m, 5H).  $^{13}\text{C}$  NMR (101 MHz, Chloroform-*d*)  $\delta$  81.0, 78.2, 67.6, 58.2, 57.2, 44.7, 27.55, 27.52, 27.10, 27.08, 27.01, 23.0, 22.5, 20.05, 20.00, 16.4, 12.6, 12.3, 11.8. IR 2856, 1471, 1063, 824, 651  $\text{cm}^{-1}$ .

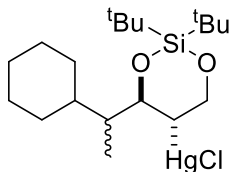

2,2-di-*tert*-butyl-4-(1-cyclohexylethyl)-1,3,2-dioxasilinan-5-yl)mercury(II) chloride

**Compound 24 (Mixture of diastereomers):** purified using a gradient of 0 to 10% EtOAc:hexanes; (Colorless thick oil, 13% brsm);  $^1\text{H}$  NMR (400 MHz, Chloroform-*d*)  $\delta$  4.47 – 4.29 (m, 3H), 3.02 (ddd,  $J$  = 12.2, 11.0, 4.6 Hz, 1H), 1.99 – 1.87 (m, 1H), 1.80 – 1.65 (m, 4H), 1.64 – 1.50 (m, 3H), 1.37 – 1.08 (m, 7H), 1.04 (s, 9H), 1.00 (s, 9H).  $^{13}\text{C}$  NMR (101 MHz, Chloroform-*d*)  $\delta$  80.0, 67.7, 55.3, 47.0, 39.2, 33.0, 30.1, 27.6, 27.4, 27.1, 27.0, 26.7, 26.4, 22.9, 19.9, 13.1. IR 2926, 1473, 1060, 751, 650  $\text{cm}^{-1}$ .

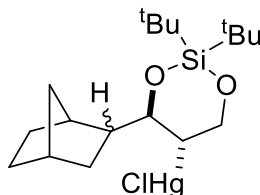

bicyclo[2.2.1]heptan-2-yl)-2,2-di-*tert*-butyl-1,3,2-dioxasilinan-5-yl)mercury(II) chloride

**Compound 25 (Mixture of diastereomers):** purified using a gradient of 0 to 10% EtOAc:hexanes; (White solid, 17%);  $^1\text{H}$  NMR (400 MHz, Chloroform-*d*) (Mixture of diastereomers)  $\delta$  4.49 – 4.18 (m, 2.4H), 4.08-4.04 (m, 0.4H), 3.95-3.91 (m, 0.2H), 2.99 – 2.81 (m, 1H), 2.61 – 2.41 (m, 1H), 2.33-2.28 (m, 1H), 1.91 – 1.80 (m, 1H), 1.77 – 1.63 (m, 1H), 1.52 – 1.40 (m, 2H), 1.40 – 1.25 (m, 3H), 1.24 – 1.11 (m, 2H), 1.07 (d,  $J$  = 1.3 Hz, 6H), 1.06 (s, 3H), 1.03 (s, 2H), 1.02 (s, 4H), 1.01 (s, 3H).  $^{13}\text{C}$  NMR (101 MHz, Chloroform-*d*)  $\delta$  80.1, 79.9, 79.1, 67.7, 67.4, 66.9, 58.3, 57.6, 57.1, 51.4, 49.2, 48.8, 40.8, 40.2, 39.0, 38.9, 38.2, 37.1, 37.0, 36.6, 36.5, 36.4, 35.7, 33.4, 30.4, 30.3, 30.1, 29.6, 28.6, 27.6, 27.55, 27.53, 27.3, 27.12, 27.10, 27.0, 23.5, 22.9, 22.88, 22.85, 19.8, 19.7. IR 2857, 1473, 1050, 825, 651  $\text{cm}^{-1}$

### III. General Procedures for Allylic Rearrangement Reactions

#### Protocol A

A 10 mL round-bottom flask was charged with organomercurial starting material (0.1 to 0.2 mmol) and a stir bar. THF (mL quantity was 10 times the mmol of starting material) and 1M aqueous HCl (mL quantity was 10 times the mmol of starting material) were added sequentially. After thirty minutes of stirring at room temperature, the contents of the reaction flask were transferred to a separatory funnel with EtOAc and H<sub>2</sub>O. The organic layer was collected, and the water layer was extracted with two additional portions of EtOAc. The organic layers were pooled, dried with MgSO<sub>4</sub>, and concentrated under reduced pressure. The resulting residue was purified by chromatography on silica gel (see individual compounds for column conditions).

#### Protocol B

A 10 mL round-bottom flask was charged with organomercurial starting material (0.1 to 0.2 mmol) and a stir bar. DMF (mL quantity was 10 times the mmol of starting material) was then added followed by 2 equivalents of NaBH<sub>4</sub>. After stirring for thirty minutes at room temperature, the reaction was quenched by slow addition of 2 mL of H<sub>2</sub>O. The contents of the reaction flask were transferred to the separatory funnel with EtOAc and H<sub>2</sub>O. The organic layer was collected, and the water layer was extracted with two additional portions of EtOAc. The organic layers were pooled, washed with an additional 20 mL of H<sub>2</sub>O, dried with MgSO<sub>4</sub>, and concentrated under reduced pressure. The resulting residue was purified by chromatography on silica gel (see individual compounds for column conditions).

### IV. Characterization of Silanol Products

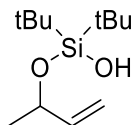

(but-3-en-2-yloxy)di-*tert*-butylsilanol

**Compound 27:** Synthesized using protocol A; Purified using a gradient of 0 to 5% EtOAc/hexanes followed by preparative thin layer chromatography (0.4% acetone/DCM); (colorless oil, 19% isolated yield); <sup>1</sup>H NMR (400 MHz, CDCl<sub>3</sub>) δ 5.81 (ddd, *J* = 17.2, 10.4, 5.9 Hz, 1H), 5.11 (dt, *J* = 17.2, 1.6 Hz, 1H), 4.93 (ddd, *J* = 10.4, 1.8, 1.2 Hz, 1H), 4.56 – 4.38 (m, 1H), 1.26 – 1.10 (m, 3H), 1.02 – 0.81 (m, 18H). <sup>13</sup>C NMR (101 MHz, CDCl<sub>3</sub>) δ 143.1, 112.6, 69.9, 27.4, 24.4, 20.4, 20.3. IR 3318, 1459, 1020, 623 cm<sup>-1</sup>. HRMS calculated for C<sub>12</sub>H<sub>25</sub>O<sub>2</sub>Si<sup>+</sup> 229.1629 Found 229.1590.

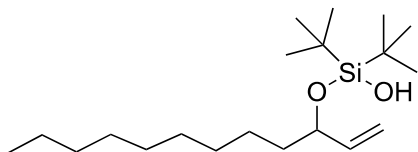

di-*tert*-butyl(dodec-1-en-3-yloxy)silanol

**Compound 29:** Synthesized using protocol A; Purified using a gradient of 5 to 40% DCM in hexanes; (Colorless oil, 34% isolated yield);  $^1\text{H}$  NMR (400 MHz,  $\text{CDCl}_3$ )  $\delta$  5.76 (ddd,  $J = 17.2$ , 10.3, 6.8 Hz, 1H), 5.09 (dt,  $J = 17.1$ , 1.5 Hz, 1H), 4.98 (ddd,  $J = 10.3$ , 1.9, 1.0 Hz, 1H), 4.40 – 4.13 (m, 1H), 1.59 – 1.32 (m, 2H), 1.20 (d,  $J = 7.9$  Hz, 14H), 0.95 (s, 9H), 0.93 (s, 9H), 0.87 – 0.69 (m, 3H).  $^{13}\text{C}$  NMR (101 MHz,  $\text{CDCl}_3$ )  $\delta$  142.0, 113.9, 74.5, 38.2, 31.9, 29.7, 29.6, 29.5, 29.3, 27.5, 27.4, 24.8, 22.6, 20.5, 20.3, 14.1. IR 1536, 1165, 1018, 842  $\text{cm}^{-1}$ . HRMS calculated for  $\text{C}_{20}\text{H}_{41}\text{O}_2\text{Si}^-$  341.2881 Found 341.2896.

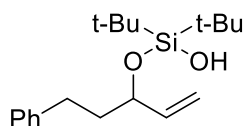

di-*tert*-butyl((5-phenylpent-1-en-3-yl)oxy)silanol

**Compound 31:** Synthesized using protocol A; Purified using a gradient of 0 to 20% EtOAc/hexanes; (colorless oil, 30% isolated yield);  $^1\text{H}$  NMR (400 MHz,  $\text{CDCl}_3$ )  $\delta$  7.35 – 7.26 (m, 3H), 7.21 (m, 2H), 5.93 (ddd,  $J = 17.1$ , 10.4, 6.7 Hz, 1H), 5.26 (dt,  $J = 17.2$ , 1.5 Hz, 1H), 5.16 (ddd,  $J = 10.4$ , 1.8, 1.0 Hz, 1H), 4.50 (q,  $J = 6.2$  Hz, 1H), 2.70 (tt,  $J = 9.7$ , 7.2 Hz, 2H), 2.01 – 1.81 (m, 2H), 1.07 (s, 9H), 1.04 (s, 9H).  $^{13}\text{C}$  NMR (101 MHz,  $\text{CDCl}_3$ )  $\delta$  142.3, 141.5, 128.37, 128.35, 125.7, 114.5, 73.9, 39.8, 31.0, 28.0, 27.4, 20.5, 20.4. IR 1553, 1200, 1018, 853  $\text{cm}^{-1}$ . HRMS calculated for  $\text{C}_{19}\text{H}_{32}\text{NaO}_2\text{Si}^+$  343.2064 Found 343.2084.

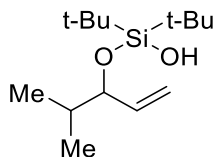

di-*tert*-butyl((4-methylpent-1-en-3-yl)oxy)silanol

**Compound 33:** Synthesized using protocol A; Purified using a gradient of 0 to 40% DCM in hexanes; (colorless oil, 54% yield);  $^1\text{H}$  NMR (400 MHz,  $\text{CDCl}_3$ )  $\delta$  5.77 (ddd,  $J = 17.4$ , 10.4, 7.2 Hz, 1H), 5.19 – 4.93 (m, 2H), 4.12 (ddt,  $J = 7.1$ , 4.9, 1.1 Hz, 1H), 1.69 (qd,  $J = 6.8$ , 4.8 Hz, 1H), 0.96 (s, 9H), 0.93 (s, 9H), 0.82 (dd,  $J = 6.9$ , 1.7 Hz, 6H).  $^{13}\text{C}$  NMR (101 MHz,  $\text{CDCl}_3$ )  $\delta$  139.8, 115.3, 81.5, 37.5, 27.6, 27.5, 20.7, 20.4, 18.0, 17.4. IR 1530, 1241, 1024, 829  $\text{cm}^{-1}$ . HRMS calculated for  $\text{C}_{14}\text{H}_{31}\text{O}_2\text{Si}^+$  259.2088 Found 259.2049.

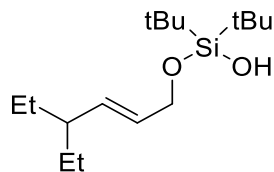

**Compound 34:** Synthesized using protocol A; Purified using a gradient of 0 to 40% DCM in hexanes; (colorless oil, 15% yield);  $^1\text{H}$  NMR (400 MHz,  $\text{CDCl}_3$ )  $\delta$  5.61 – 5.49 (m, 1H), 5.42 (ddt,  $J$  = 15.3, 8.6, 1.4 Hz, 1H), 4.33 (dd,  $J$  = 5.4, 1.4 Hz, 2H), 1.93 (s, 1H), 1.80 (dtd,  $J$  = 13.5, 8.7, 5.0 Hz, 1H), 1.51 – 1.36 (m, 2H), 1.33 – 1.17 (m, 2H), 1.05 (s, 18H), 0.86 (t,  $J$  = 7.4 Hz, 6H).  $^{13}\text{C}$  NMR (101 MHz,  $\text{CDCl}_3$ )  $\delta$  135.4, 129.4, 64.2, 45.7, 27.5, 27.4, 20.4, 11.6. IR 2857, 1468, 1206, 805  $\text{cm}^{-1}$ . HRMS calculated for  $\text{C}_{16}\text{H}_{34}\text{NaO}_2\text{Si}^+$  309.2220 Found 309.2209.

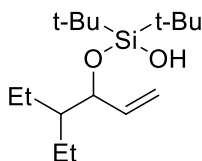

di-*tert*-butyl((4-ethylhex-1-en-3-yl)oxy)silanol

**Compound 35:** synthesized using protocol A; purified using a gradient of 0 to 40% DCM in hexanes; (colorless oil, 58% yield);  $^1\text{H}$  NMR (400 MHz,  $\text{CDCl}_3$ )  $\delta$  5.78 (ddd,  $J$  = 17.4, 10.4, 7.2 Hz, 1H), 5.19 – 4.96 (m, 2H), 4.44 – 4.25 (m, 1H), 1.59 – 1.48 (m, 1H), 1.35 – 1.18 (m, 3H), 1.11 – 0.99 (m, 1H), 0.94 (d,  $J$  = 11.8 Hz, 18H), 0.84 (td,  $J$  = 7.2, 5.2 Hz, 6H).  $^{13}\text{C}$  NMR (101 MHz,  $\text{CDCl}_3$ )  $\delta$  139.9, 114.9, 76.1, 48.6, 27.59, 27.50, 22.2, 21.6, 20.6, 20.4, 12.27, 12.19. IR 3373, 2942, 1471, 1030, 820  $\text{cm}^{-1}$ . HRMS calculated for  $\text{C}_{16}\text{H}_{34}\text{NaO}_2\text{Si}^+$  309.2220 Found 309.2222.

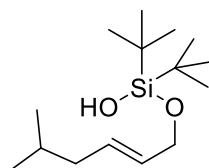

(*E*)-di-*tert*-butyl((5-methylhex-2-en-1-yl)oxy)silanol

**Compound 36:** synthesized using protocol A; purified using a gradient of 0 to 40% DCM in hexanes; (Colorless oil, 30%);  $^1\text{H}$  NMR (400 MHz, Chloroform-*d*)  $\delta$  5.72 – 5.61 (m, 1H), 5.61 – 5.51 (m, 1H), 4.30 (dd,  $J$  = 5.2, 1.2 Hz, 2H), 1.92 (td,  $J$  = 6.8, 1.1 Hz, 2H), 1.62 (tq,  $J$  = 13.1, 6.6 Hz, 2H), 1.02 (s, 18H), 0.88 (d,  $J$  = 6.6 Hz, 6H);  $^{13}\text{C}$  NMR (101 MHz, Chloroform-*d*)  $\delta$  130.4, 130.0, 64.1, 41.5, 28.3, 27.4, 22.2, 20.4; IR 2933, 1472, 1099, 825  $\text{cm}^{-1}$ ; HRMS calculated for  $\text{C}_{15}\text{H}_{31}\text{O}_2\text{Si}^-$  271.2093 Found 271.2156.

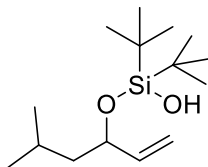

di-*tert*-butyl((5-methylhex-1-en-3-yl)oxy)silanol

**Compound 37:** synthesized using protocol A; purified using a gradient of 0 to 40% DCM in hexanes; (Colorless oil, 56%);  $^1\text{H}$  NMR (400 MHz, Chloroform-*d*)  $\delta$  5.84 (ddd,  $J = 17.4, 10.3, 7.2$  Hz, 1H), 5.24 – 5.02 (m, 2H), 4.42 (td,  $J = 7.2, 6.2$  Hz, 1H), 1.71 (d,  $J = 3.5$  Hz, 1H), 1.69 – 1.63 (m, 1H), 1.49 (ddd,  $J = 13.8, 7.6, 6.4$  Hz, 1H), 1.35 (dt,  $J = 13.4, 6.7$  Hz, 1H), 1.04 (s, 9H), 1.00 (s, 9H), 0.93 (d,  $J = 6.8$  Hz, 3H), 0.91 (d,  $J = 6.6$  Hz, 3H);  $^{13}\text{C}$  NMR (101 MHz, Chloroform-*d*)  $\delta$  142.4, 113.9, 73.2, 47.5, 27.5, 27.4, 24.2, 23.1, 22.6, 20.5, 20.2; IR 2858, 1470, 1064, 826, 644  $\text{cm}^{-1}$ ; HRMS calculated for  $\text{C}_{15}\text{H}_{31}\text{O}_2\text{Si}^-$  271.2093 Found 271.2154.

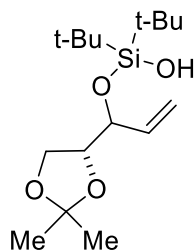

di-*tert*-butyl((1-((*R*)-2,2-dimethyl-1,3-dioxolan-4-yl)allyl)oxy)silanol

**Compound 40:** synthesized using protocol B; single diastereomer, relative stereochemistry unassigned; purified using a gradient of 0 to 20% EtOAc:hexanes; (colorless oil, 50% yield);  $^1\text{H}$  NMR (400 MHz,  $\text{CDCl}_3$ )  $\delta$  5.75 (ddd,  $J = 17.1, 10.5, 4.8$  Hz, 1H), 5.37 (dt,  $J = 17.1, 1.8$  Hz, 1H), 5.15 (dt,  $J = 10.5, 1.8$  Hz, 1H), 4.71 (ddt,  $J = 5.0, 3.5, 1.8$  Hz, 1H), 4.06 (ddd,  $J = 7.6, 6.8, 3.3$  Hz, 1H), 3.87 (t,  $J = 7.7$  Hz, 1H), 3.79 (dd,  $J = 7.8, 6.8$  Hz, 1H), 1.39 (s, 3H), 1.31 – 1.24 (m, 3H), 0.99 (s, 9H), 0.95 (s, 9H).  $^{13}\text{C}$  NMR (101 MHz,  $\text{CDCl}_3$ )  $\delta$  136.5, 116.3, 109.1, 78.2, 71.6, 63.8, 27.66, 27.60, 26.1, 24.7, 21.0, 20.4. IR 2890, 1477, 1074, 841  $\text{cm}^{-1}$ . HRMS calculated for  $\text{C}_{16}\text{H}_{32}\text{NaO}_4\text{Si}^+$  339.1962 Found 339.1947.

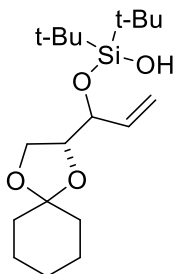

((1-((*R*)-1,4-dioxaspiro[4.5]decan-2-yl)allyl)oxy)di-*tert*-butylsilanol

**Compound 41:** Synthesized using protocol B; single diastereomer, relative stereochemistry unassigned; purified using a gradient of 0 to 20% EtOAc in Hexanes; (colorless oil, 51% yield);  $^1\text{H}$  NMR (400 MHz,  $\text{CDCl}_3$ )  $\delta$  5.74 (ddd,  $J = 17.0, 10.5, 4.6$  Hz, 1H), 5.36 (dt,  $J = 17.1, 1.8$  Hz, 1H), 5.14 (dt,  $J = 10.5, 1.8$  Hz, 1H), 4.75 (ddt,  $J = 5.0, 3.4, 1.8$  Hz, 1H), 4.06 (ddd,  $J = 7.8, 6.8,$



3.1 Hz, 1H), 3.84 (t,  $J = 7.7$  Hz, 1H), 3.77 (dd,  $J = 7.8, 6.8$  Hz, 1H), 1.76 – 1.43 (m, 8H), 1.40 – 1.24 (m, 2H), 0.98 (s, 9H), 0.96 (s, 9H).  $^{13}\text{C}$  NMR (101 MHz,  $\text{CDCl}_3$ )  $\delta$  136.5, 116.2, 109.7, 77.7, 71.5, 63.3, 35.7, 34.0, 27.69, 27.62, 25.1, 24.0, 23.6, 21.1, 20.4. IR 2850, 1154, 1008, 821  $\text{cm}^{-1}$ . HRMS calculated for  $\text{C}_{19}\text{H}_{35}\text{O}_4\text{Si}^-$  355.2310 Found 355.2305.

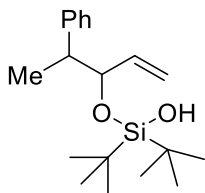

di-*tert*-butyl((4-phenylpent-1-en-3-yl)oxy)silanol

**Compound 42:** synthesized using protocol A; single diastereomer, relative stereochemistry unassigned; purified using a gradient of 0 to 50% DCM:hexanes; (colorless oil, 75% yield);  $^1\text{H}$  NMR (400 MHz,  $\text{CDCl}_3$ )  $\delta$  7.18 (ttt,  $J = 17.9, 7.2, 1.3$  Hz, 5H), 5.72 (ddd,  $J = 17.2, 10.4, 6.8$  Hz, 1H), 5.16 – 5.06 (m, 2H), 4.39 (tt,  $J = 6.8, 1.1$  Hz, 1H), 2.80 (p,  $J = 7.0$  Hz, 1H), 1.17 (d,  $J = 7.1$  Hz, 3H), 0.88 (s, 9H), 0.83 (s, 9H).  $^{13}\text{C}$  NMR (101 MHz,  $\text{CDCl}_3$ )  $\delta$  144.0, 139.6, 128.4, 128.0, 126.3, 115.7, 79.4, 46.8, 27.51, 27.49, 20.6, 20.4, 16.0. IR 2895, 1464, 1072, 821  $\text{cm}^{-1}$ . HRMS calculated for  $\text{C}_{19}\text{H}_{32}\text{NaO}_2\text{Si}^+$  343.2064 Found 343.2042.

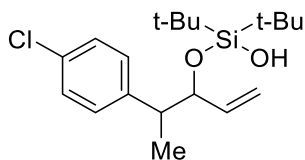

di-*tert*-butyl((4-(4-chlorophenyl)pent-1-en-3-yl)oxy)silanol

**Compound 43:** synthesized using protocol A; single diastereomer, relative stereochemistry unassigned; purified using a gradient of 0 to 20% EtOAc:hexanes; (colorless oil, 90% yield);  $^1\text{H}$  NMR (400 MHz,  $\text{CDCl}_3$ )  $\delta$  7.23 – 7.15 (m, 2H), 7.14 – 7.03 (m, 2H), 5.66 (ddd,  $J = 17.4, 10.4, 7.1$  Hz, 1H), 5.12 – 4.99 (m, 2H), 4.35 (ddt,  $J = 7.1, 6.1, 1.0$  Hz, 1H), 2.80 (p,  $J = 7.0$  Hz, 1H), 1.17 (t,  $J = 6.7$  Hz, 3H), 0.88 (s, 9H), 0.85 (s, 9H).  $^{13}\text{C}$  NMR (101 MHz,  $\text{CDCl}_3$ )  $\delta$  142.1, 139.4, 131.9, 129.8, 128.0, 116.0, 79.2, 46.1, 27.4, 20.6, 20.3, 15.8. IR 2943, 2866, 1489, 829  $\text{cm}^{-1}$ . HRMS calculated for  $\text{C}_{19}\text{H}_{32}\text{ClO}_2\text{Si}^+$  355.1855 Found 355.1821.

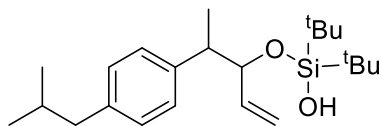

( $\pm$ ) di-*tert*-butyl((4-(4-isobutylphenyl)pent-1-en-3-yl)oxy)silanol

**Compound 44:** synthesized using protocol A; single diastereomer, relative stereochemistry unassigned; (Colorless oil, 91% yield);  $^1\text{H}$  NMR (400 MHz, Chloroform- $d$ )  $\delta$  7.15 (d,  $J = 8.2$  Hz, 2H), 7.08 (d,  $J = 8.0$  Hz, 2H), 5.81 (ddd,  $J = 17.3, 10.4, 6.9$  Hz, 1H), 5.24 – 5.09 (m, 2H), 4.50 – 4.39 (m, 1H), 2.84 (p,  $J = 7.1$  Hz, 1H), 2.45 (d,  $J = 7.1$  Hz, 2H), 1.84 (dt,  $J = 13.5, 6.8$  Hz, 1H), 1.22 (d,  $J = 7.1$  Hz, 3H), 0.96 (s, 9H), 0.90 (d,  $J = 6.8$  Hz, 6H), 0.89 (s, 9H);  $^{13}\text{C}$  NMR (101 MHz, Chloroform- $d$ )  $\delta$  141.2, 139.9, 139.6, 128.7, 128.1, 115.6, 79.5, 46.3, 45.0, 30.2, 27.4, 22.35, 22.33,

20.5, 20.4, 16.1; IR 2932, 1275, 764, 826, 645  $\text{cm}^{-1}$ ; HRMS calculated for  $\text{C}_{23}\text{H}_{39}\text{O}_2\text{Si}^-$  375.2719 found 375.2737.

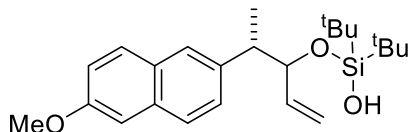

(±) di-*tert*-butyl((4-(6-methoxynaphthalen-2-yl)pent-1-en-3-yl)oxy)silanol

**Compound 45:** synthesized using protocol A; Single diastereomer, absolute stereochemistry unassigned; purified using a gradient of 0 to 40% DCM in hexanes; (Colorless oil, 74% yield);  $^1\text{H}$  NMR (400 MHz, Chloroform-*d*)  $\delta$  7.69 (d,  $J$  = 8.4 Hz, 2H), 7.61 (d,  $J$  = 1.7 Hz, 1H), 7.39 (dd,  $J$  = 8.5, 1.8 Hz, 1H), 7.15 (d,  $J$  = 2.5 Hz, 1H), 7.12 (s, 1H), 5.82 (ddd,  $J$  = 17.2, 10.4, 6.8 Hz, 1H), 5.24 – 5.09 (m, 2H), 4.65 – 4.53 (m, 1H), 3.93 (s, 3H), 3.05 (p,  $J$  = 7.0 Hz, 1H), 1.35 (d,  $J$  = 7.1 Hz, 3H), 0.98 (s, 9H), 0.91 (s, 9H);  $^{13}\text{C}$  NMR (101 MHz, Chloroform-*d*)  $\delta$  157.2, 139.5, 138.9, 133.3, 129.0, 128.8, 127.4, 126.8, 126.3, 118.6, 115.6, 105.5, 79.2, 55.2, 46.6, 27.48, 27.44, 20.5, 20.4, 15.9; IR 2933, 1261, 750, 650  $\text{cm}^{-1}$ ; HRMS calculated for  $\text{C}_{24}\text{H}_{35}\text{O}_3\text{Si}^-$  399.2355 found 399.2313.

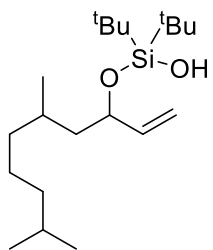

(±) di-*tert*-butyl((-5,9-dimethyldec-1-en-3-yl)oxy)silanol

**Compound 46 (*dr* = 1:1):** synthesized using protocol A; purified using a gradient of 0 to 40% DCM in hexanes.; (Colorless oil, 66% yield);  $^1\text{H}$  NMR (400 MHz, Chloroform-*d*)  $\delta$  5.84 (dddd,  $J$  = 18.6, 17.5, 10.3, 7.3 Hz, 1H), 5.23 – 5.12 (m, 1H), 5.06 (ddd,  $J$  = 10.8, 5.2, 1.6 Hz, 1H), 4.44 (ddd,  $J$  = 13.1, 7.2, 5.7 Hz, 1H), 1.67 – 1.37 (m, 4H), 1.30 (dtt,  $J$  = 11.4, 4.4, 2.9 Hz, 2H), 1.25 – 1.19 (m, 1H), 1.19 – 1.08 (m, 3H), 1.04 (d,  $J$  = 0.9 Hz, 9H), 1.00 (d,  $J$  = 0.9 Hz, 9H), 0.93 – 0.89 (m, 3H), 0.88 (s, 3H), 0.86 (s, 3H);  $^{13}\text{C}$  NMR (101 MHz, Chloroform-*d*)  $\delta$  142.7, 142.2, 114.1, 113.8, 73.2, 73.0, 45.9, 45.7, 39.29, 39.20, 37.8, 37.3, 29.0, 28.7, 27.9, 27.58, 27.53, 27.48, 27.45, 24.66, 24.46, 22.68, 22.66, 22.60, 20.1, 19.8; IR 2929, 1470, 1070, 826, 644  $\text{cm}^{-1}$ ; HRMS calculated for  $\text{C}_{20}\text{H}_{41}\text{O}_2\text{Si}^-$  341.2876 found 341.2909.

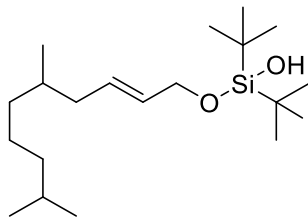

(*E*)-di-*tert*-butyl((5,9-dimethyldec-2-en-1-yl)oxy)silanol

**Compound 46 isomer:** synthesized using protocol A; purified using a gradient of 0 to 40% DCM in hexanes ; (Colorless oil, 22% yield);  $^1\text{H}$  NMR (400 MHz, Chloroform-*d*)  $\delta$  5.75 – 5.50 (m, 2H), 4.31 (dd,  $J$  = 5.2, 1.2 Hz, 2H), 2.10 – 1.96 (m, 1H), 1.88 (dtd,  $J$  = 13.9, 7.2, 1.1 Hz, 1H), 1.51 (dt,  $J$  = 13.2, 6.6 Hz, 2H), 1.33 – 1.24 (m, 3H), 1.18 – 1.08 (m, 3H), 1.03 (s, 18H), 0.93 – 0.79 (m, 9H);  $^{13}\text{C}$  NMR (101 MHz, Chloroform-*d*)  $\delta$  130.4, 129.9, 64.1, 39.6, 39.2, 36.7, 33.0, 27.9, 27.4, 24.7, 22.6, 22.5, 20.4, 19.5; IR 2930, 1469, 1104, 826  $\text{cm}^{-1}$ ; HRMS calculated for  $\text{C}_{20}\text{H}_{41}\text{O}_2\text{Si}^-$  341.2876 found 341.2876.

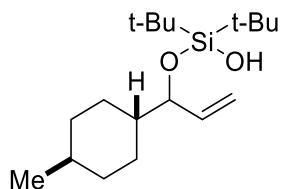

di-*tert*-butyl((4-methylcyclohexyl)allyl)oxy)silanol

**Compound 47:** synthesized using Protocol A; purified using a gradient of 0 to 50% DCM in hexanes; (colorless oil, 70% yield);  $^1\text{H}$  NMR (400 MHz,  $\text{CDCl}_3$ )  $\delta$  5.78 (ddd,  $J = 17.5, 10.4, 7.3$  Hz, 1H), 5.15 – 4.94 (m, 2H), 4.10 (ddd,  $J = 7.3, 5.1, 1.2$  Hz, 1H), 1.81 – 1.57 (m, 5H), 1.29 (tdt,  $J = 11.9, 5.1, 3.2$  Hz, 1H), 0.94 (d,  $J = 13.4$  Hz, 20H), 0.88 – 0.73 (m, 5H).  $^{13}\text{C}$  NMR (101 MHz,  $\text{CDCl}_3$ )  $\delta$  140.6, 114.9, 79.0, 44.4, 35.08, 35.06, 32.9, 28.3, 28.1, 27.6, 27.5, 22.6, 20.7, 20.4. IR 2864, 1460, 1066, 832  $\text{cm}^{-1}$ . HRMS calculated for  $\text{C}_{18}\text{H}_{35}\text{O}_2\text{Si}^-$  311.2412 Found 311.2430.

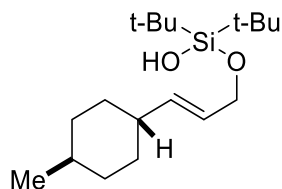

di-*tert*-butyl(((*E*)-3-(4-methylcyclohexyl)allyl)oxy)silanol

**Compound 47 isomer:** synthesized using Protocol A; purified using a gradient of 0 to 50% DCM:hexanes; (colorless oil, 30% yield);  $^1\text{H}$  NMR (400 MHz,  $\text{CDCl}_3$ )  $\delta$  5.65 (ddt,  $J = 15.5, 6.3, 1.2$  Hz, 1H), 5.55 (dtd,  $J = 15.5, 5.2, 1.0$  Hz, 1H), 4.31 (dt,  $J = 5.1, 1.1$  Hz, 2H), 1.96 – 1.84 (m, 1H), 1.81 – 1.66 (m, 4H), 1.38 – 1.25 (m, 1H), 1.05 (m, 22H), 0.90 (d,  $J = 6.5$  Hz, 3H).  $^{13}\text{C}$  NMR (101 MHz,  $\text{CDCl}_3$ )  $\delta$  137.4, 126.8, 64.3, 40.0, 34.9, 32.8, 32.3, 27.4, 22.7, 20.4. IR 2889, 1484, 1030, 866  $\text{cm}^{-1}$ . HRMS calculated for  $\text{C}_{18}\text{H}_{35}\text{O}_2\text{Si}^-$  311.2412 found 311.2466.

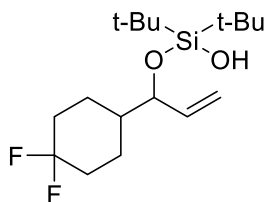

di-*tert*-butyl((1-(4,4-difluorocyclohexyl)allyl)oxy)silanol

**Compound 48:** synthesized using Protocol A; purified using a gradient of 0 to 50% DCM:hexanes; (colorless oil, 77% yield);  $^1\text{H}$  NMR (400 MHz,  $\text{CDCl}_3$ )  $\delta$  5.76 (ddd,  $J = 17.5, 10.4, 7.4$  Hz, 1H), 5.17 – 5.01 (m, 2H), 4.20 – 4.11 (m, 1H), 2.11 – 1.98 (m, 2H), 1.84 – 1.69 (m, 3H), 1.69 – 1.49 (m, 2H), 1.49 – 1.37 (m, 1H), 1.37 – 1.12 (m, 1H), 0.95 (s, 9H), 0.93 (s, 9H).  $^{13}\text{C}$  NMR (101 MHz,  $\text{CDCl}_3$ )  $\delta$  139.7, 123.7 (t,  $J = 240$  Hz), 115.9, 77.8 (d,  $J = 2.5$  Hz), 42.8 (d,  $J = 1.6$  Hz), 33.5 (dd,  $J = 25.7, 22.4$  Hz), 27.6, 27.5, 24.4 (dd,  $J = 35.8, 10.0$  Hz), 20.7, 20.4. IR 2849, 1365, 1094, 835  $\text{cm}^{-1}$ . HRMS calculated for  $\text{C}_{17}\text{H}_{31}\text{F}_2\text{O}_2\text{Si}^-$  333.2067 Found 333.2104.

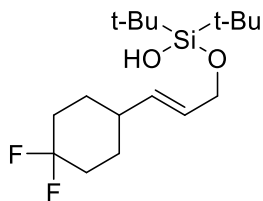

(*E*)-di-*tert*-butyl((3-(4,4-difluorocyclohexyl)allyl)oxy)silanol

**Compound 48 isomer:** synthesized using protocol A; colorless oil;  $^1\text{H}$  NMR (400 MHz,  $\text{CDCl}_3$ )  $\delta$  5.87 – 5.46 (m, 2H), 4.34 (ddd,  $J$  = 3.6, 2.6, 1.3 Hz, 2H), 2.15 – 2.05 (m, 3H), 1.90 – 1.76 (m, 2H), 1.71 (dd,  $J$  = 13.3, 4.5 Hz, 2H), 1.48 (dt,  $J$  = 17.4, 12.4 Hz, 2H), 1.05 (s, 18H).  $^{13}\text{C}$  NMR (101 MHz,  $\text{CDCl}_3$ )  $\delta$  133.7, 128.5, 123.4 (t,  $J$  = 230 Hz), 63.9, 37.9, 33.1 (dd,  $J$  = 25.3, 22.8 Hz), 28.7 (d,  $J$  = 9.3 Hz), 27.4, 20.4. IR 2878, 1447, 1100, 829  $\text{cm}^{-1}$ . HRMS calculated for  $\text{C}_{17}\text{H}_{33}\text{F}_2\text{O}_2\text{Si}^+$  335.2212 Found 335.2166.

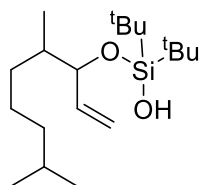

( $\pm$ )di-*tert*-butyl((4,8-dimethylnon-1-en-3-yl)oxy)silanol

**Compound 49 (*dr* = ~2:1):** synthesized using protocol A; purified using a gradient of 0 to 40% DCM:hexanes; (Colorless oil, 48%);  $^1\text{H}$  NMR (400 MHz, Chloroform-*d*)  $\delta$  5.77 (dddd,  $J$  = 17.3, 11.9, 10.4, 7.1 Hz, 1H), 5.15 – 5.00 (m, 2H), 4.26 – 4.16 (m, 1H), 1.74 (s, 1H), 1.58 (dddp,  $J$  = 11.1, 6.6, 4.3, 2.1 Hz, 1H), 1.51 – 1.40 (m, 2H), 1.34 – 1.22 (m, 2H), 1.17 – 1.03 (m, 3H), 0.96 (s, 9H), 0.93 (s, 9H), 0.80 (d,  $J$  = 6.5 Hz, 9H);  $^{13}\text{C}$  NMR (101 MHz, Chloroform-*d*)  $\delta$  140.2, 139.3, 115.3, 114.9, 78.6, 78.1, 39.9, 39.7, 39.30, 39.27, 32.9, 31.9, 27.9, 27.61, 27.57, 27.50, 27.48, 25.22, 25.09, 22.72, 22.67, 22.59, 22.53, 20.73, 20.66, 20.47, 20.44, 14.9, 14.2; IR 2858, 1470, 1075, 826, 644  $\text{cm}^{-1}$ ; HRMS calculated for  $\text{C}_{19}\text{H}_{39}\text{O}_2\text{Si}^-$  327.2719 found 327.2708.

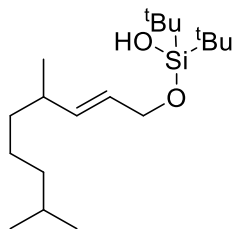

(*E*)-di-*tert*-butyl((4,8-dimethylnon-2-en-1-yl)oxy)silanol

**Compound 49 isomer:** synthesized using protocol A; purified using a gradient of 0 to 40% DCM:hexanes; (Colorless oil, 19%);  $^1\text{H}$  NMR (400 MHz, Chloroform-*d*)  $\delta$  5.59 – 5.47 (m, 2H), 4.34 – 4.27 (m, 2H), 2.18 – 2.07 (m, 1H), 1.52 (dt,  $J$  = 13.3, 6.6 Hz, 1H), 1.28 – 1.23 (m, 5H), 1.17 – 1.12 (m, 2H), 1.03 (s, 18H), 0.98 (d,  $J$  = 6.7 Hz, 3H), 0.86 (dd,  $J$  = 6.6, 0.8 Hz, 6H);  $^{13}\text{C}$  NMR (101 MHz, Chloroform-*d*)  $\delta$  137.3, 127.4, 64.2, 39.1, 37.1, 36.2, 27.9, 27.4, 25.0, 22.65, 22.62, 20.5; IR 2930, 1469, 1103, 826  $\text{cm}^{-1}$ ; HRMS calculated for  $\text{C}_{19}\text{H}_{39}\text{O}_2\text{Si}^-$  327.2719 found 327.2708.

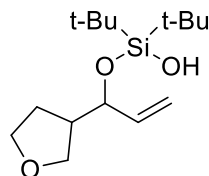

di-*tert*-butyl((1-(tetrahydrofuran-3-yl)allyl)oxy)silanol

**Compound 50:** synthesized using protocol A; single diastereomer, relative stereochemistry unassigned; purified using a gradient of 0 to 30% EtOAc:hexanes; (light yellow semi-solid, 80% yield);  $^1\text{H}$  NMR (400 MHz,  $\text{CDCl}_3$ )  $\delta$  5.78 (ddd,  $J = 17.4, 10.3, 7.3$  Hz, 1H), 5.23 – 4.99 (m, 2H), 4.23 (ddt,  $J = 8.3, 7.3, 1.0$  Hz, 1H), 3.82 – 3.74 (m, 2H), 3.74 – 3.61 (m, 2H), 2.38 – 2.25 (m, 1H), 1.79 (dddd,  $J = 12.4, 8.6, 7.4, 4.8$  Hz, 1H), 1.62 (dq,  $J = 12.6, 7.7$  Hz, 1H), 1.01 – 0.87 (m, 18H).  $^{13}\text{C}$  NMR (101 MHz,  $\text{CDCl}_3$ )  $\delta$  140.3, 115.6, 76.6, 70.3, 68.2, 46.2, 28.3, 27.6, 27.4, 20.7, 20.4. IR 2849, 1471, 1065, 829  $\text{cm}^{-1}$ . HRMS calculated for  $\text{C}_{15}\text{H}_{29}\text{O}_3\text{Si}^-$  285.1891 Found 285.1921.

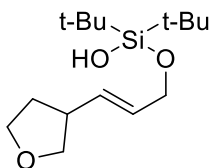

(*E*)-di-*tert*-butyl((3-(tetrahydrofuran-3-yl)allyl)oxy)silanol

**Compound 50 isomer:** synthesized using protocol A; purified using a gradient of 0 to 30% EtOAc:hexanes; (white semi-solid, 20% yield);  $^1\text{H}$  NMR (400 MHz,  $\text{CDCl}_3$ )  $\delta$  5.70 – 5.53 (m, 2H), 4.29 (d,  $J = 3.5$  Hz, 2H), 3.95 – 3.82 (m, 2H), 3.78 (qd,  $J = 7.7, 1.9$  Hz, 1H), 3.41 (t,  $J = 8.0$  Hz, 1H), 2.92 – 2.76 (m, 1H), 2.07 (dtd,  $J = 12.2, 7.6, 4.5$  Hz, 1H), 1.69 (dq,  $J = 12.2, 8.0$  Hz, 1H), 1.01 (s, 18H).  $^{13}\text{C}$  NMR (101 MHz,  $\text{CDCl}_3$ )  $\delta$  130.6, 130.3, 130.2, 129.9, 72.8, 68.1, 63.8, 63.6, 42.2, 33.1, 33.0, 27.8, 27.4, 21.2, 20.5. IR 2855, 1465, 1068, 829  $\text{cm}^{-1}$ . HRMS calculated for  $\text{C}_{15}\text{H}_{29}\text{O}_3\text{Si}^-$  285.1891 Found 285.1870.

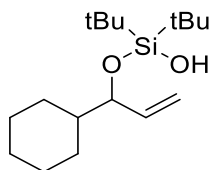

di-*tert*-butyl((1-cyclohexylallyl)oxy)silanol

**Compound 51:** synthesized using protocol A; Purified using a gradient of 0 to 0.1% acetone/DCM; (colorless oil, 67% isolated yield);  $^1\text{H}$  NMR (400 MHz,  $\text{CDCl}_3$ )  $\delta$  5.78 (ddd,  $J = 17.5, 10.4, 7.3$  Hz, 1H), 5.18 – 4.84 (m, 2H), 4.19 – 3.94 (m, 1H), 1.78 – 1.52 (m, 6H), 1.34 (tdt,  $J = 11.7, 5.2, 3.1$  Hz, 1H), 1.22 – 1.00 (m, 4H), 0.96 (s, 9H), 0.93 (s, 9H).  $^{13}\text{C}$  NMR (101 MHz,  $\text{CDCl}_3$ )  $\delta$  140.6, 115.0, 79.1, 44.7, 28.5, 28.2, 27.6, 27.5, 26.7, 26.36, 26.33, 20.7, 20.4. IR 1512, 1159, 853, 494  $\text{cm}^{-1}$ . HRMS calculated for  $\text{C}_{17}\text{H}_{33}\text{O}_2\text{Si}^-$  297.2255 Found 297.2245.

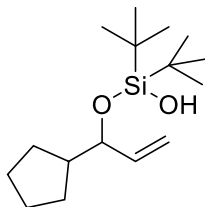

di-*tert*-butyl((1-cyclopentylallyl)oxy)silanol

**Compound 52:** synthesized using protocol A; purified using a gradient of 0-40% DCM:hexanes.; (Colorless oil, 57%);  $^1\text{H}$  NMR (400 MHz, Chloroform-*d*)  $\delta$  5.88 (ddd,  $J = 17.5, 10.3, 7.5$  Hz, 1H), 5.24 – 5.04 (m, 2H), 4.31 – 4.20 (m, 1H), 2.06 – 1.93 (m, 1H), 1.80 – 1.69 (m, 2H), 1.66 – 1.38 (m, 6H), 1.37 – 1.29 (m, 1H), 1.04 (s, 9H), 1.01 (s, 9H);  $^{13}\text{C}$  NMR (101 MHz, Chloroform-*d*)  $\delta$  141.4, 114.6, 78.3, 46.7, 28.3, 28.2, 27.6, 27.5, 25.6, 25.5, 20.8, 20.3; IR 2858, 1472, 1066, 825, 644  $\text{cm}^{-1}$ ; HRMS calculated for  $\text{C}_{16}\text{H}_{31}\text{O}_2\text{Si}^-$  283.2093 found 283.2114.

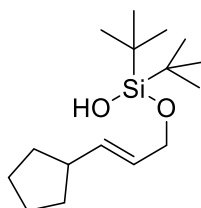

(*E*)-di-*tert*-butyl((3-cyclopentylallyl)oxy)silanol

**Compound 52 isomer:** synthesized using protocol A; purified using a gradient of 0-40% DCM:hexanes.; (Colorless oil, 10%);  $^1\text{H}$  NMR (400 MHz, Chloroform-*d*)  $\delta$  5.72 – 5.60 (m, 1H), 5.60 – 5.51 (m, 1H), 4.30 (dt,  $J = 5.3, 1.0$  Hz, 2H), 2.44 (q,  $J = 7.9$  Hz, 1H), 1.83 – 1.74 (m, 2H), 1.69 – 1.60 (m, 3H), 1.59 – 1.53 (m, 2H), 1.40 – 1.23 (m, 2H), 1.03 (s, 18H);  $^{13}\text{C}$  NMR (101 MHz, Chloroform-*d*)  $\delta$  135.9, 127.4, 64.2, 42.8, 32.9, 27.4, 25.0, 20.4. IR 2934, 1472, 1064, 825  $\text{cm}^{-1}$ ; HRMS calculated for  $\text{C}_{16}\text{H}_{31}\text{O}_2\text{Si}^-$  283.2093 found 283.2163.

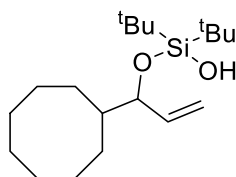

di-*tert*-butyl((1-cyclooctylallyl)oxy)silanol

**Compound 53:** synthesized using protocol A; purified using a gradient of 0-40% DCM:hexanes.; (Colorless oil, 68%);  $^1\text{H}$  NMR (400 MHz, Chloroform-*d*)  $\delta$  5.84 (ddd,  $J = 17.3, 10.4, 6.9$  Hz, 1H), 5.23 – 5.06 (m, 2H), 4.22 (ddt,  $J = 6.9, 4.8, 1.1$  Hz, 1H), 1.79 – 1.64 (m, 5H), 1.63 – 1.53 (m, 4H), 1.53 – 1.38 (m, 5H), 1.31-1.18 (m, 2H), 1.04 (s, 9H), 1.01 (s, 9H);  $^{13}\text{C}$  NMR (101 MHz, Chloroform-*d*)  $\delta$  139.9, 115.1, 79.6, 44.2, 29.3, 28.1, 27.6, 27.5, 26.77, 26.68, 26.60, 26.44, 26.14, 20.6, 20.4; IR 2928, 1472, 1246, 826, 738, 644  $\text{cm}^{-1}$ ; HRMS calculated for  $\text{C}_{19}\text{H}_{39}\text{O}_2\text{Si}^+$  327.2719 found 327.2703.

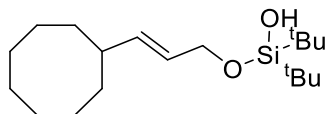

(*E*)-di-*tert*-butyl((3-cyclooctylallyl)oxy)silanol

**Compound 53 isomer:** synthesized using protocol A; purified using a gradient of 0-40% DCM:hexanes.; (Colorless oil, 16%);  $^1\text{H}$  NMR (400 MHz, Chloroform-*d*)  $\delta$  5.59 (ddt,  $J = 15.4$ , 7.1, 1.4 Hz, 1H), 5.42 (dtd,  $J = 15.4$ , 5.5, 1.2 Hz, 1H), 4.22 (dt,  $J = 5.5$ , 1.1 Hz, 2H), 2.21 – 2.08 (m, 1H), 1.60 (m, 4H), 1.54 – 1.29 (m, 10H), 0.95 (s, 18H);  $^{13}\text{C}$  NMR (101 MHz, Chloroform-*d*)  $\delta$  138.2, 126.3, 64.4, 40.3, 31.7, 29.7, 27.4, 25.9, 25.0, 20.4; IR 2922, 1471, 1099, 826  $\text{cm}^{-1}$ ; HRMS calculated for  $\text{C}_{19}\text{H}_{39}\text{O}_2\text{Si}^+$  327.2719 found 327.2706.

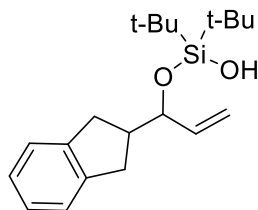

di-*tert*-butyl((1-(2,3-dihydro-1*H*-inden-2-yl)allyl)oxy)silanol

**Compound 54:** synthesized using protocol A; purified using a gradient of 0 to 50% DCM:hexanes; (colorless oil, 71% yield);  $^1\text{H}$  NMR (400 MHz,  $\text{CDCl}_3$ )  $\delta$  7.16 – 6.88 (m, 4H), 5.80 (ddd,  $J = 17.4$ , 10.3, 7.3 Hz, 1H), 5.26 – 5.13 (m, 1H), 5.05 (ddd,  $J = 10.3$ , 1.8, 0.9 Hz, 1H), 4.37 (ddt,  $J = 7.3$ , 6.3, 1.0 Hz, 1H), 3.03 – 2.70 (m, 4H), 2.65 – 2.46 (m, 1H), 0.95 (s, 9H), 0.93 (s, 9H).  $^{13}\text{C}$  NMR (101 MHz,  $\text{CDCl}_3$ )  $\delta$  143.17, 143.13, 140.4, 126.1, 126.0, 124.4, 124.3, 115.4, 77.7, 46.1, 35.1, 34.9, 27.6, 27.5, 20.7, 20.4. IR 2949, 2860, 1477, 1086  $\text{cm}^{-1}$ . HRMS calculated for  $\text{C}_{20}\text{H}_{31}\text{O}_2\text{Si}^+$  331.2099 Found 331.2130.

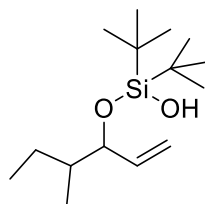

( $\pm$ )-di-*tert*-butyl(-4-methylhex-1-en-3-yl)oxy)silanol

**Compound 55 (dr = ~1.5:1):** synthesized using protocol A; purified using a gradient of 0-40% DCM:hexanes; (Colorless oil, 51% yield);  $^1\text{H}$  NMR (400 MHz, Chloroform-*d*)  $\delta$  5.85 (dddd,  $J = 17.4$ , 12.6, 10.4, 7.1 Hz, 1H), 5.24 – 5.08 (m, 2H), 4.30 (dddt,  $J = 8.9$ , 6.7, 4.2, 1.1 Hz, 1H), 1.69 – 1.52 (m, 1H), 1.52 – 1.39 (m, 1H), 1.20 – 1.06 (m, 2H), 1.04 (s, 9H), 1.01 (s, 9H), 0.94 – 0.86 (m, 6H);  $^{13}\text{C}$  NMR (101 MHz, Chloroform-*d*)  $\delta$  140.2, 139.3, 115.3, 114.9, 78.5, 77.9, 41.8, 41.6, 27.60, 27.57, 27.50, 27.48, 25.3, 24.5, 20.7, 20.6, 20.48, 20.44, 14.4, 13.8, 12.0, 11.9; IR 2963, 1472, 1072, 826, 644  $\text{cm}^{-1}$ ; HRMS calculated for  $\text{C}_{15}\text{H}_{31}\text{O}_2\text{Si}^+$  271.2093 found 271.2119.

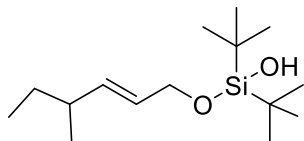

(*E*)-di-*tert*-butyl((4-methylhex-2-en-1-yl)oxy)silanol

**Compound 55 isomer:** synthesized using protocol A; purified using a gradient of 0-40% DCM:hexanes; (Colorless oil, 25% yield);  $^1\text{H}$  NMR (400 MHz, Chloroform-*d*)  $\delta$  5.61 – 5.48 (m, 2H), 4.35 – 4.25 (m, 2H), 2.10 – 1.99 (m, 1H), 1.32 (p,  $J = 7.3$  Hz, 2H), 1.03 (s, 18H), 0.98 (d,  $J = 6.7$  Hz, 3H), 0.87 (t,  $J = 7.4$  Hz, 3H);  $^{13}\text{C}$  NMR (101 MHz, Chloroform-*d*)  $\delta$  137.0, 127.6, 64.2, 37.8, 29.6, 27.4, 20.4, 19.9, 11.6; IR 2962, 1472, 1089, 825  $\text{cm}^{-1}$ ; HRMS calculated for  $\text{C}_{15}\text{H}_{31}\text{O}_2\text{Si}^-$  271.2093 found 271.2102.

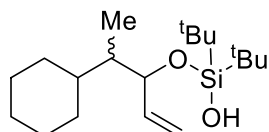

( $\pm$ )-di-*tert*-butyl((4-cyclohexylpent-1-en-3-yl)oxy)silanol

**Compound 56 (*dr* = 2.5:1):** synthesized using protocol A; purified using a gradient of 0-40% DCM:hexanes; (Colorless oil, 34% yield);  $^1\text{H}$  NMR (400 MHz, Chloroform-*d*)  $\delta$  5.79 (dddd,  $J = 33.6, 17.4, 10.4, 7.3$  Hz, 1H), 5.17 – 5.00 (m, 2H), 4.44 – 4.25 (m, 1H), 1.71 – 1.54 (m, 5H), 1.38 (qd,  $J = 7.0, 5.5$  Hz, 1H), 1.29 – 1.23 (m, 1H), 1.16 – 0.99 (m, 5H), 0.96 (d,  $J = 1.8$  Hz, 9H), 0.93 (s, 9H), 0.82 (d,  $J = 6.9$  Hz, 2H), 0.72 (d,  $J = 6.9$  Hz, 2H);  $^{13}\text{C}$  NMR (101 MHz, Chloroform-*d*)  $\delta$  142.0, 139.6, 115.3, 114.7, 75.6, 45.2, 45.0, 38.6, 38.4, 32.3, 31.8, 29.7, 29.3, 28.8, 27.68, 27.56, 27.51, 27.48, 26.72, 26.62, 26.52, 20.88, 20.64, 20.40, 11.1, 10.8. IR 2857, 1472, 1066, 827, 764, 645  $\text{cm}^{-1}$ ; HRMS calculated for  $\text{C}_{19}\text{H}_{39}\text{O}_2\text{Si}^+$  327.2719 found 327.2703.

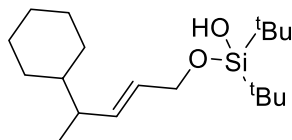

(*E*)-di-*tert*-butyl((4-cyclohexylpent-2-en-1-yl)oxy)silanol

**Compound 56 isomer:** synthesized using protocol A; purified using a gradient of 0-40% DCM:hexanes; (Colorless oil, 42% yield);  $^1\text{H}$  NMR (400 MHz, Chloroform-*d*)  $\delta$  5.65 – 5.45 (m, 2H), 4.33 (dd,  $J = 5.4, 1.1$  Hz, 2H), 1.99 (q,  $J = 6.8$  Hz, 1H), 1.78 – 1.62 (m, 7H), 1.29 – 1.12 (m, 5H), 1.05 (s, 18H), 0.98 (d,  $J = 6.9$  Hz, 3H);  $^{13}\text{C}$  NMR (101 MHz, Chloroform-*d*)  $\delta$  135.9, 128.2, 64.3, 43.1, 41.8, 30.3, 27.5, 27.4, 26.6, 20.4, 17.4; IR 2926, 1472, 1096, 826  $\text{cm}^{-1}$ ; HRMS calculated for  $\text{C}_{19}\text{H}_{39}\text{O}_2\text{Si}^+$  327.2719 found 327.2703.

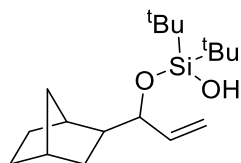

((1-((1*S*,4*R*)-bicyclo[2.2.1]heptan-2-yl)allyl)oxy)di-*tert*-butylsilanol



**Compound 57 (Mixture of diastereomers):** synthesized using protocol A; purified using a gradient of 0-40% DCM:hexanes; (Colorless oil, 72% yield);  $^1\text{H}$  NMR (400 MHz, Chloroform-*d*)  $\delta$  5.85 (ddt,  $J = 17.4, 10.3, 8.3$  Hz, 0.8H), 5.76 – 5.66 (m, 0.2 H), 5.25 – 5.02 (m, 2H), 4.25 – 4.08 (m, 0.8H), 3.98 – 3.88 (m, 0.2H), 2.48 – 2.37 (m, 0.6H), 2.26 – 2.17 (m, 0.6H), 2.16-2.12 (m, 0.4H), 2.11 – 2.02 (m, 0.4H), 1.91 – 1.76 (m, 2H), 1.75-1.65 (m, 0.5H), 1.55-1.45 (m, 2H), 1.44-1.38 (m, 0.4H), 1.37-1.25 (m, 2.4H), 1.24-1.10 (m, 2H), 1.05 (s, 2H), 1.04 (s, 3.6H), 1.03 (s, 3H), 1.02 (s, 3.5H), 1.00 (s, 2H), 0.99 (s, 3H), 0.95-0.8 (m, 0.4H) 0.59 (ddd,  $J = 12.2, 6.1, 2.3$  Hz, 1H);  $^{13}\text{C}$  NMR (101 MHz, Chloroform-*d*)  $\delta$  142.3, 115.2, 114.8, 114.2, 78.2, 47.9, 47.8, 39.8, 39.7, 38.6, 38.3, 37.8, 37.1, 36.7, 36.5, 35.3, 35.1, 32.8, 30.5, 30.1, 28.8, 27.67, 27.65, 27.55, 27.51, 27.48, 23.1, 22.7, 20.7, 20.3; IR 2946, 1472, 1070, 825, 544  $\text{cm}^{-1}$ ; HRMS calculated for  $\text{C}_{18}\text{H}_{33}\text{O}_2\text{Si}^-$  309.2250 found 309.2209.

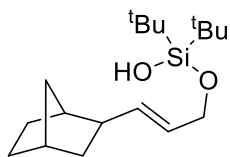

(((*E*)-3-((1*S*,4*R*)-bicyclo[2.2.1]heptan-2-yl)allyl)oxy)di-*tert*-butylsilanol

**Compound 57 isomer (*dr* = 5:1):** synthesized using protocol A; purified using a gradient of 0-40% DCM:hexanes; (Colorless oil, 8% yield);  $^1\text{H}$  NMR (400 MHz, Chloroform-*d*)  $\delta$  5.72 (ddt,  $J = 15.3, 7.4, 1.4$  Hz, 0.8H), 5.62 – 5.43 (m, 1H), 5.50 (dtd,  $J = 15.2, 5.3, 0.9$  Hz, 0.2H), 4.35 (dt,  $J = 5.3, 1.1$  Hz, 1.6H), 4.31 (dt,  $J = 5.3, 1.1$  Hz, 0.4H), 2.55 – 2.44 (m, 1H), 2.26 – 2.03 (m, 2H), 1.86 (s, 1H), 1.82 – 1.70 (m, 1H), 1.51 (m, 2H), 1.41 – 1.23 (m, 3H), 1.19 – 1.09 (m, 1H), 1.06 (s, 13H), 1.05 (s, 5H), 0.92 (m, 1H);  $^{13}\text{C}$  NMR (101 MHz, Chloroform-*d*)  $\delta$  136.8, 134.4, 129.0, 126.6, 64.2, 44.4, 42.7, 42.4, 42.2, 39.9, 37.7, 37.3, 36.6, 35.9, 35.6, 30.2, 29.7, 29.0, 27.4, 23.0, 20.4; IR 2947, 1473, 1116, 827  $\text{cm}^{-1}$ ; HRMS calculated for  $\text{C}_{18}\text{H}_{33}\text{O}_2\text{Si}^-$  309.2250 found 309.2219.

## V. Procedure for dihydroxylation

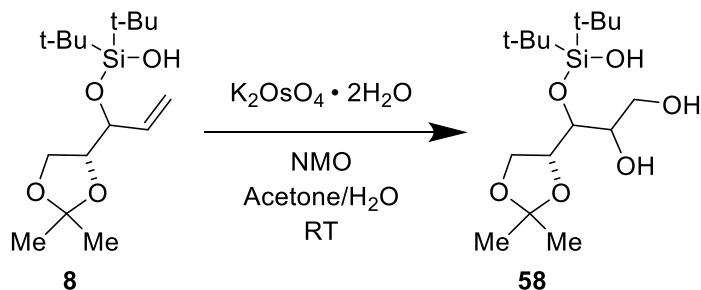

**8** (33.4 mg, 0.106 mmol) was dissolved in 1 mL of Acetone and 0.1 mL of  $\text{H}_2\text{O}$  and transferred to a 10 mL round-bottom flask with magnetic stir-bar. 5 mg of  $\text{K}_2\text{OsO}_4 \cdot 2\text{H}_2\text{O}$  (0.014 mmol, 0.12 equiv.) was added followed by 31 mg of NMO (0.229 mmol, 2.2 equiv.). The mixture was stirred for 40 h upon which it was transferred to a separatory funnel with EtOAc and diluted with additional  $\text{H}_2\text{O}$ . The organic layer was separated, and the water layer was extracted twice with EtOAc. The organic fractions were combined, dried over  $\text{MgSO}_4$ , and concentrated under reduced pressure. The resulting residue was purified by chromatography on silica gel (gradient of 1 to 6% MeOH in  $\text{CH}_2\text{Cl}_2$ ) to yield 15 mg of **58** as a single diastereomer (40% yield).

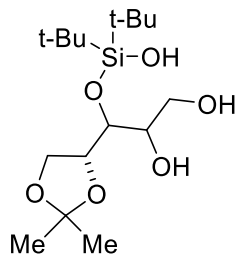

3-((di-*tert*-butyl(hydroxy)silyl)oxy)-3-((*R*)-2,2-dimethyl-1,3-dioxolan-4-yl)propane-1,2-diol

**Compound 58:** single diastereomer, relative stereochemistry unassigned; purified using a gradient of 0 to 5% MeOH in DCM; (colorless oil, 40% yield);  $^1\text{H}$  NMR (400 MHz,  $\text{CDCl}_3$ )  $\delta$  4.19 (dd,  $J$  = 6.2, 3.4 Hz, 1H), 4.06 (q,  $J$  = 6.3 Hz, 1H), 4.04 – 3.98 (m, 1H), 3.98 – 3.92 (m, 1H), 3.92 – 3.85 (m, 1H), 3.71 (d,  $J$  = 5.4 Hz, 2H), 1.38 (s, 3H), 1.28 (s, 3H), 0.99 (s, 9H), 0.96 (s, 9H).  $^{13}\text{C}$  NMR (101 MHz,  $\text{CDCl}_3$ )  $\delta$  109.23, 75.97, 75.13, 73.46, 66.43, 62.28, 27.95, 27.59, 26.52, 25.13, 21.08, 20.68. IR 3396, 2943, 2855, 1383, 1077  $\text{cm}^{-1}$ . HRMS calculated for  $\text{C}_{16}\text{H}_{33}\text{O}_6\text{Si}^-$  349.2052 Found 349.2057.  $[\alpha]_{\text{D}} = +12.57$  ( $c$  = 0.56,  $\text{CHCl}_3$ )

## VI. Crystal Structure Data for 18 (CCDC Number: 2052702)

Crystals grown from EtOAc/pentane.

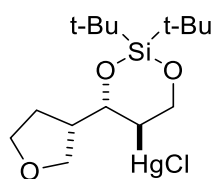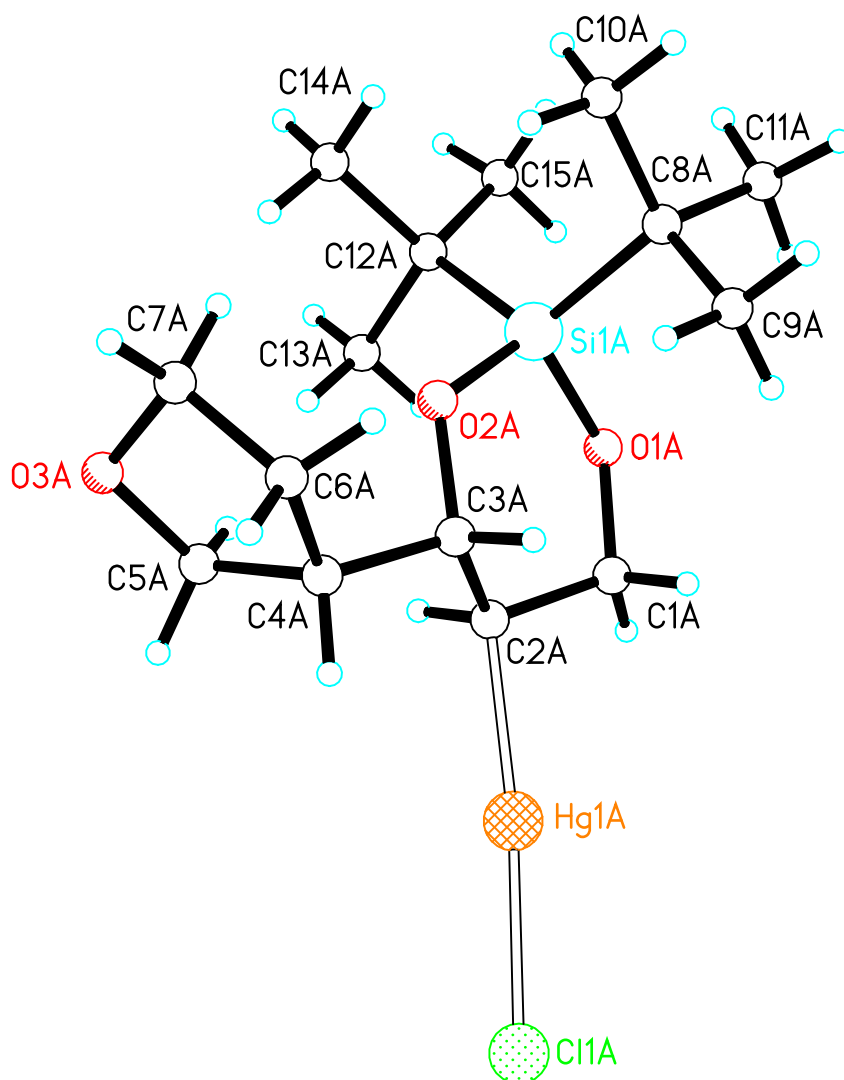

Table S1. Crystal data and structure refinement for HgCl(C<sub>15</sub>H<sub>29</sub>O<sub>3</sub>Si).

|                                   |                                                                                                |                 |
|-----------------------------------|------------------------------------------------------------------------------------------------|-----------------|
| Identification code               | q20l                                                                                           |                 |
| Empirical formula                 | C <sub>30</sub> H <sub>58</sub> Cl <sub>2</sub> Hg <sub>2</sub> O <sub>6</sub> Si <sub>2</sub> |                 |
| Formula weight                    | 1043.02                                                                                        |                 |
| Temperature                       | 200(2) K                                                                                       |                 |
| Wavelength                        | 1.54178 Å                                                                                      |                 |
| Crystal system                    | Triclinic                                                                                      |                 |
| Space group                       | P-1                                                                                            |                 |
| Unit cell dimensions              | a = 8.9987(4) Å                                                                                | α = 80.030(2)°. |
|                                   | b = 11.7133(5) Å                                                                               | β = 89.554(2)°. |
|                                   | c = 18.4226(8) Å                                                                               | γ = 86.392(3)°. |
| Volume                            | 1908.70(14) Å <sup>3</sup>                                                                     |                 |
| Z                                 | 2                                                                                              |                 |
| Density (calculated)              | 1.815 Mg/m <sup>3</sup>                                                                        |                 |
| Absorption coefficient            | 16.407 mm <sup>-1</sup>                                                                        |                 |
| F(000)                            | 1016                                                                                           |                 |
| Crystal size                      | 0.098 x 0.032 x 0.023 mm <sup>3</sup>                                                          |                 |
| Theta range for data collection   | 2.435 to 70.344°.                                                                              |                 |
| Index ranges                      | -10 ≤ h ≤ 10, -13 ≤ k ≤ 13, -21 ≤ l ≤ 21                                                       |                 |
| Reflections collected             | 24512                                                                                          |                 |
| Independent reflections           | 6719 [R(int) = 0.0575]                                                                         |                 |
| Completeness to theta = 66.000°   | 96.3 %                                                                                         |                 |
| Absorption correction             | Numerical face-indexed                                                                         |                 |
| Max. and min. transmission        | 0.3912 and 0.0621                                                                              |                 |
| Refinement method                 | Full-matrix least-squares on F <sup>2</sup>                                                    |                 |
| Data / restraints / parameters    | 6719 / 0 / 391                                                                                 |                 |
| Goodness-of-fit on F <sup>2</sup> | 1.052                                                                                          |                 |
| Final R indices [I > 2σ(I)]       | R1 = 0.0536, wR2 = 0.1457                                                                      |                 |
| R indices (all data)              | R1 = 0.0612, wR2 = 0.1560                                                                      |                 |
| Extinction coefficient            | n/a                                                                                            |                 |
| Largest diff. peak and hole       | 3.396 and -4.154 e.Å <sup>-3</sup>                                                             |                 |

Table S2. Atomic coordinates ( $\times 10^4$ ) and equivalent isotropic displacement parameters ( $\text{\AA}^2 \times 10^3$ ) for HgCl(C<sub>15</sub>H<sub>29</sub>O<sub>3</sub>Si). U(eq) is defined as one third of the trace of the orthogonalized  $U^{ij}$  tensor.

|        | x        | y         | z       | U(eq)  |
|--------|----------|-----------|---------|--------|
| Hg(1A) | 1943(1)  | -941(1)   | 5481(1) | 37(1)  |
| Cl(1A) | 1162(2)  | -1277(2)  | 4335(1) | 42(1)  |
| Si(1A) | 3261(2)  | -269(2)   | 8044(1) | 33(1)  |
| O(1A)  | 3079(8)  | -1512(5)  | 7771(3) | 47(2)  |
| O(2A)  | 3105(6)  | 735(5)    | 7298(3) | 34(1)  |
| O(3A)  | 4818(9)  | 2821(7)   | 6032(5) | 67(2)  |
| C(1A)  | 2424(12) | -1588(8)  | 7077(5) | 46(2)  |
| C(2A)  | 2863(9)  | -618(7)   | 6466(4) | 33(2)  |
| C(3A)  | 2394(9)  | 574(7)    | 6626(4) | 34(2)  |
| C(4A)  | 2799(9)  | 1604(7)   | 6036(4) | 36(2)  |
| C(5A)  | 4475(10) | 1686(8)   | 5909(5) | 44(2)  |
| C(6A)  | 2301(11) | 2775(8)   | 6253(5) | 47(2)  |
| C(7A)  | 3702(12) | 3223(9)   | 6500(6) | 52(2)  |
| C(8A)  | 1719(11) | -12(10)   | 8707(5) | 52(2)  |
| C(9A)  | 274(14)  | 120(20)   | 8273(8) | 112(7) |
| C(10A) | 1907(17) | 1090(12)  | 9025(8) | 80(4)  |
| C(11A) | 1636(19) | -1028(14) | 9348(8) | 98(5)  |
| C(12A) | 5219(11) | -277(9)   | 8392(6) | 50(2)  |
| C(13A) | 6260(13) | -747(13)  | 7839(7) | 73(4)  |
| C(14A) | 5635(13) | 955(12)   | 8468(8) | 75(4)  |
| C(15A) | 5489(17) | -1073(12) | 9141(7) | 84(4)  |
| Hg(1B) | 7265(1)  | 3910(1)   | 5461(1) | 38(1)  |
| Cl(1B) | 6484(3)  | 3589(2)   | 4314(1) | 46(1)  |
| Si(1B) | 8444(2)  | 4687(2)   | 8018(1) | 34(1)  |
| O(1B)  | 8582(9)  | 3438(6)   | 7732(4) | 56(2)  |
| O(2B)  | 7996(6)  | 5679(5)   | 7284(3) | 36(1)  |
| O(3B)  | 9318(10) | 7981(7)   | 5935(5) | 68(2)  |
| C(1B)  | 7932(12) | 3271(8)   | 7051(5) | 48(2)  |
| C(2B)  | 8116(10) | 4302(7)   | 6443(4) | 33(2)  |
| C(3B)  | 7378(9)  | 5435(7)   | 6616(4) | 33(2)  |
| C(4B)  | 7558(9)  | 6515(7)   | 6029(5) | 36(2)  |

|        |           |          |         |        |
|--------|-----------|----------|---------|--------|
| C(5B)  | 9196(10)  | 6787(8)  | 5860(5) | 41(2)  |
| C(6B)  | 6867(11)  | 7623(8)  | 6269(5) | 46(2)  |
| C(7B)  | 8215(12)  | 8243(8)  | 6452(6) | 50(2)  |
| C(8B)  | 6905(11)  | 4672(10) | 8721(5) | 52(2)  |
| C(9B)  | 5462(14)  | 4570(19) | 8328(8) | 107(7) |
| C(10B) | 6843(17)  | 5768(13) | 9067(8) | 86(4)  |
| C(11B) | 7142(16)  | 3616(13) | 9342(7) | 83(4)  |
| C(12B) | 10330(10) | 5001(10) | 8318(5) | 50(2)  |
| C(13B) | 11464(12) | 4710(17) | 7731(7) | 100(6) |
| C(14B) | 10406(17) | 6283(13) | 8395(8) | 88(5)  |
| C(15B) | 10857(13) | 4274(12) | 9052(6) | 68(3)  |

---

Table S3. Bond lengths [ $\text{\AA}$ ] and angles [ $^\circ$ ] for HgCl(C15H29O3Si).

|               |           |               |           |
|---------------|-----------|---------------|-----------|
| Hg(1A)-C(2A)  | 2.103(8)  | C(9A)-H(9AC)  | 0.9800    |
| Hg(1A)-Cl(1A) | 2.335(2)  | C(10A)-H(10A) | 0.9800    |
| Si(1A)-O(1A)  | 1.638(6)  | C(10A)-H(10B) | 0.9800    |
| Si(1A)-O(2A)  | 1.646(6)  | C(10A)-H(10C) | 0.9800    |
| Si(1A)-C(12A) | 1.879(10) | C(11A)-H(11A) | 0.9800    |
| Si(1A)-C(8A)  | 1.886(10) | C(11A)-H(11B) | 0.9800    |
| O(1A)-C(1A)   | 1.432(10) | C(11A)-H(11C) | 0.9800    |
| O(2A)-C(3A)   | 1.445(9)  | C(12A)-C(13A) | 1.527(14) |
| O(3A)-C(7A)   | 1.429(12) | C(12A)-C(15A) | 1.537(16) |
| O(3A)-C(5A)   | 1.440(11) | C(12A)-C(14A) | 1.543(15) |
| C(1A)-C(2A)   | 1.523(12) | C(13A)-H(13A) | 0.9800    |
| C(1A)-H(1AA)  | 0.9900    | C(13A)-H(13B) | 0.9800    |
| C(1A)-H(1AB)  | 0.9900    | C(13A)-H(13C) | 0.9800    |
| C(2A)-C(3A)   | 1.510(11) | C(14A)-H(14A) | 0.9800    |
| C(2A)-H(2AA)  | 1.0000    | C(14A)-H(14B) | 0.9800    |
| C(3A)-C(4A)   | 1.538(11) | C(14A)-H(14C) | 0.9800    |
| C(3A)-H(3AA)  | 1.0000    | C(15A)-H(15A) | 0.9800    |
| C(4A)-C(5A)   | 1.530(11) | C(15A)-H(15B) | 0.9800    |
| C(4A)-C(6A)   | 1.533(13) | C(15A)-H(15C) | 0.9800    |
| C(4A)-H(4AA)  | 1.0000    | Hg(1B)-C(2B)  | 2.102(8)  |
| C(5A)-H(5AA)  | 0.9900    | Hg(1B)-Cl(1B) | 2.332(2)  |
| C(5A)-H(5AB)  | 0.9900    | Si(1B)-O(1B)  | 1.637(7)  |
| C(6A)-C(7A)   | 1.499(13) | Si(1B)-O(2B)  | 1.657(6)  |
| C(6A)-H(6AA)  | 0.9900    | Si(1B)-C(12B) | 1.867(9)  |
| C(6A)-H(6AB)  | 0.9900    | Si(1B)-C(8B)  | 1.887(10) |
| C(7A)-H(7AA)  | 0.9900    | O(1B)-C(1B)   | 1.436(10) |
| C(7A)-H(7AB)  | 0.9900    | O(2B)-C(3B)   | 1.435(9)  |
| C(8A)-C(9A)   | 1.517(17) | O(3B)-C(7B)   | 1.426(12) |
| C(8A)-C(10A)  | 1.526(15) | O(3B)-C(5B)   | 1.441(12) |
| C(8A)-C(11A)  | 1.529(16) | C(1B)-C(2B)   | 1.515(12) |
| C(9A)-H(9AA)  | 0.9800    | C(1B)-H(1BA)  | 0.9900    |
| C(9A)-H(9AB)  | 0.9800    | C(1B)-H(1BB)  | 0.9900    |
|               |           | C(2B)-C(3B)   | 1.529(11) |
|               |           | C(2B)-H(2BA)  | 1.0000    |
|               |           | C(3B)-C(4B)   | 1.532(11) |
|               |           | C(3B)-H(3BA)  | 1.0000    |

|                     |           |                     |          |
|---------------------|-----------|---------------------|----------|
| C(4B)-C(6B)         | 1.536(12) | O(1A)-Si(1A)-O(2A)  | 106.2(3) |
| C(4B)-C(5B)         | 1.545(11) | O(1A)-Si(1A)-C(12A) | 107.5(4) |
| C(4B)-H(4BA)        | 1.0000    | O(2A)-Si(1A)-C(12A) | 106.8(4) |
| C(5B)-H(5BA)        | 0.9900    | O(1A)-Si(1A)-C(8A)  | 109.5(4) |
| C(5B)-H(5BB)        | 0.9900    | O(2A)-Si(1A)-C(8A)  | 109.7(4) |
| C(6B)-C(7B)         | 1.522(13) | C(12A)-Si(1A)-C(8A) | 116.6(5) |
| C(6B)-H(6BA)        | 0.9900    | C(1A)-O(1A)-Si(1A)  | 122.4(6) |
| C(6B)-H(6BB)        | 0.9900    | C(3A)-O(2A)-Si(1A)  | 123.8(5) |
| C(7B)-H(7BA)        | 0.9900    | C(7A)-O(3A)-C(5A)   | 108.5(7) |
| C(7B)-H(7BB)        | 0.9900    | O(1A)-C(1A)-C(2A)   | 112.3(7) |
| C(8B)-C(9B)         | 1.513(15) | O(1A)-C(1A)-H(1AA)  | 109.1    |
| C(8B)-C(10B)        | 1.527(17) | C(2A)-C(1A)-H(1AA)  | 109.1    |
| C(8B)-C(11B)        | 1.538(16) | O(1A)-C(1A)-H(1AB)  | 109.1    |
| C(9B)-H(9BA)        | 0.9800    | C(2A)-C(1A)-H(1AB)  | 109.1    |
| C(9B)-H(9BB)        | 0.9800    | H(1AA)-C(1A)-H(1AB) | 107.9    |
| C(9B)-H(9BC)        | 0.9800    | C(3A)-C(2A)-C(1A)   | 112.5(7) |
| C(10B)-H(10D)       | 0.9800    | C(3A)-C(2A)-Hg(1A)  | 112.8(6) |
| C(10B)-H(10E)       | 0.9800    | C(1A)-C(2A)-Hg(1A)  | 107.0(5) |
| C(10B)-H(10F)       | 0.9800    | C(3A)-C(2A)-H(2AA)  | 108.1    |
| C(11B)-H(11D)       | 0.9800    | C(1A)-C(2A)-H(2AA)  | 108.1    |
| C(11B)-H(11E)       | 0.9800    | Hg(1A)-C(2A)-H(2AA) | 108.1    |
| C(11B)-H(11F)       | 0.9800    | O(2A)-C(3A)-C(2A)   | 109.2(7) |
| C(12B)-C(15B)       | 1.529(14) | O(2A)-C(3A)-C(4A)   | 105.9(6) |
| C(12B)-C(14B)       | 1.538(17) | C(2A)-C(3A)-C(4A)   | 115.9(7) |
| C(12B)-C(13B)       | 1.547(15) | O(2A)-C(3A)-H(3AA)  | 108.6    |
| C(13B)-H(13D)       | 0.9800    | C(2A)-C(3A)-H(3AA)  | 108.6    |
| C(13B)-H(13E)       | 0.9800    | C(4A)-C(3A)-H(3AA)  | 108.6    |
| C(13B)-H(13F)       | 0.9800    | C(5A)-C(4A)-C(6A)   | 103.7(7) |
| C(14B)-H(14D)       | 0.9800    | C(5A)-C(4A)-C(3A)   | 114.0(7) |
| C(14B)-H(14E)       | 0.9800    | C(6A)-C(4A)-C(3A)   | 112.1(7) |
| C(14B)-H(14F)       | 0.9800    | C(5A)-C(4A)-H(4AA)  | 109.0    |
| C(15B)-H(15D)       | 0.9800    | C(6A)-C(4A)-H(4AA)  | 109.0    |
| C(15B)-H(15E)       | 0.9800    | C(3A)-C(4A)-H(4AA)  | 109.0    |
| C(15B)-H(15F)       | 0.9800    | O(3A)-C(5A)-C(4A)   | 106.3(8) |
|                     |           | O(3A)-C(5A)-H(5AA)  | 110.5    |
| C(2A)-Hg(1A)-Cl(1A) | 174.2(2)  | C(4A)-C(5A)-H(5AA)  | 110.5    |



|                      |           |                      |           |
|----------------------|-----------|----------------------|-----------|
| O(3A)-C(5A)-H(5AB)   | 110.5     | C(8A)-C(11A)-H(11C)  | 109.5     |
| C(4A)-C(5A)-H(5AB)   | 110.5     | H(11A)-C(11A)-H(11C) | 109.5     |
| H(5AA)-C(5A)-H(5AB)  | 108.7     | H(11B)-C(11A)-H(11C) | 109.5     |
| C(7A)-C(6A)-C(4A)    | 104.5(8)  | C(13A)-C(12A)-C(15A) | 107.0(10) |
| C(7A)-C(6A)-H(6AA)   | 110.8     | C(13A)-C(12A)-C(14A) | 109.4(10) |
| C(4A)-C(6A)-H(6AA)   | 110.8     | C(15A)-C(12A)-C(14A) | 108.1(10) |
| C(7A)-C(6A)-H(6AB)   | 110.8     | C(13A)-C(12A)-Si(1A) | 107.7(7)  |
| C(4A)-C(6A)-H(6AB)   | 110.8     | C(15A)-C(12A)-Si(1A) | 113.1(9)  |
| H(6AA)-C(6A)-H(6AB)  | 108.9     | C(14A)-C(12A)-Si(1A) | 111.4(7)  |
| O(3A)-C(7A)-C(6A)    | 103.6(8)  | C(12A)-C(13A)-H(13A) | 109.5     |
| O(3A)-C(7A)-H(7AA)   | 111.0     | C(12A)-C(13A)-H(13B) | 109.5     |
| C(6A)-C(7A)-H(7AA)   | 111.0     | H(13A)-C(13A)-H(13B) | 109.5     |
| O(3A)-C(7A)-H(7AB)   | 111.0     | C(12A)-C(13A)-H(13C) | 109.5     |
| C(6A)-C(7A)-H(7AB)   | 111.0     | H(13A)-C(13A)-H(13C) | 109.5     |
| H(7AA)-C(7A)-H(7AB)  | 109.0     | H(13B)-C(13A)-H(13C) | 109.5     |
| C(9A)-C(8A)-C(10A)   | 109.1(12) | C(12A)-C(14A)-H(14A) | 109.5     |
| C(9A)-C(8A)-C(11A)   | 108.9(12) | C(12A)-C(14A)-H(14B) | 109.5     |
| C(10A)-C(8A)-C(11A)  | 108.3(11) | H(14A)-C(14A)-H(14B) | 109.5     |
| C(9A)-C(8A)-Si(1A)   | 106.8(7)  | C(12A)-C(14A)-H(14C) | 109.5     |
| C(10A)-C(8A)-Si(1A)  | 111.5(7)  | H(14A)-C(14A)-H(14C) | 109.5     |
| C(11A)-C(8A)-Si(1A)  | 112.2(9)  | H(14B)-C(14A)-H(14C) | 109.5     |
| C(8A)-C(9A)-H(9AA)   | 109.5     | C(12A)-C(15A)-H(15A) | 109.5     |
| C(8A)-C(9A)-H(9AB)   | 109.5     | C(12A)-C(15A)-H(15B) | 109.5     |
| H(9AA)-C(9A)-H(9AB)  | 109.5     | H(15A)-C(15A)-H(15B) | 109.5     |
| C(8A)-C(9A)-H(9AC)   | 109.5     | C(12A)-C(15A)-H(15C) | 109.5     |
| H(9AA)-C(9A)-H(9AC)  | 109.5     | H(15A)-C(15A)-H(15C) | 109.5     |
| H(9AB)-C(9A)-H(9AC)  | 109.5     | H(15B)-C(15A)-H(15C) | 109.5     |
| C(8A)-C(10A)-H(10A)  | 109.5     | C(2B)-Hg(1B)-Cl(1B)  | 174.6(2)  |
| C(8A)-C(10A)-H(10B)  | 109.5     | O(1B)-Si(1B)-O(2B)   | 106.1(3)  |
| H(10A)-C(10A)-H(10B) | 109.5     | O(1B)-Si(1B)-C(12B)  | 108.2(5)  |
| C(8A)-C(10A)-H(10C)  | 109.5     | O(2B)-Si(1B)-C(12B)  | 106.6(4)  |
| H(10A)-C(10A)-H(10C) | 109.5     | O(1B)-Si(1B)-C(8B)   | 109.3(5)  |
| H(10B)-C(10A)-H(10C) | 109.5     | O(2B)-Si(1B)-C(8B)   | 109.4(4)  |
| C(8A)-C(11A)-H(11A)  | 109.5     | C(12B)-Si(1B)-C(8B)  | 116.7(4)  |
| C(8A)-C(11A)-H(11B)  | 109.5     | C(1B)-O(1B)-Si(1B)   | 122.6(6)  |
| H(11A)-C(11A)-H(11B) | 109.5     | C(3B)-O(2B)-Si(1B)   | 124.7(5)  |

|                     |          |
|---------------------|----------|
| C(7B)-O(3B)-C(5B)   | 107.1(7) |
| O(1B)-C(1B)-C(2B)   | 111.7(7) |
| O(1B)-C(1B)-H(1BA)  | 109.3    |
| C(2B)-C(1B)-H(1BA)  | 109.3    |
| O(1B)-C(1B)-H(1BB)  | 109.3    |
| C(2B)-C(1B)-H(1BB)  | 109.3    |
| H(1BA)-C(1B)-H(1BB) | 107.9    |
| C(1B)-C(2B)-C(3B)   | 113.2(7) |
| C(1B)-C(2B)-Hg(1B)  | 108.3(5) |
| C(3B)-C(2B)-Hg(1B)  | 111.1(6) |
| C(1B)-C(2B)-H(2BA)  | 108.0    |
| C(3B)-C(2B)-H(2BA)  | 108.0    |
| Hg(1B)-C(2B)-H(2BA) | 108.0    |
| O(2B)-C(3B)-C(2B)   | 109.5(6) |
| O(2B)-C(3B)-C(4B)   | 106.4(6) |
| C(2B)-C(3B)-C(4B)   | 115.7(7) |
| O(2B)-C(3B)-H(3BA)  | 108.4    |
| C(2B)-C(3B)-H(3BA)  | 108.4    |
| C(4B)-C(3B)-H(3BA)  | 108.4    |
| C(3B)-C(4B)-C(6B)   | 112.1(7) |
| C(3B)-C(4B)-C(5B)   | 113.9(7) |
| C(6B)-C(4B)-C(5B)   | 104.0(7) |
| C(3B)-C(4B)-H(4BA)  | 108.9    |
| C(6B)-C(4B)-H(4BA)  | 108.9    |
| C(5B)-C(4B)-H(4BA)  | 108.9    |
| O(3B)-C(5B)-C(4B)   | 106.4(7) |
| O(3B)-C(5B)-H(5BA)  | 110.4    |
| C(4B)-C(5B)-H(5BA)  | 110.4    |
| O(3B)-C(5B)-H(5BB)  | 110.4    |
| C(4B)-C(5B)-H(5BB)  | 110.4    |
| H(5BA)-C(5B)-H(5BB) | 108.6    |
| C(7B)-C(6B)-C(4B)   | 103.4(7) |
| C(7B)-C(6B)-H(6BA)  | 111.1    |
| C(4B)-C(6B)-H(6BA)  | 111.1    |
| C(7B)-C(6B)-H(6BB)  | 111.1    |
| C(4B)-C(6B)-H(6BB)  | 111.1    |

|                      |           |
|----------------------|-----------|
| H(6BA)-C(6B)-H(6BB)  | 109.0     |
| O(3B)-C(7B)-C(6B)    | 104.3(8)  |
| O(3B)-C(7B)-H(7BA)   | 110.9     |
| C(6B)-C(7B)-H(7BA)   | 110.9     |
| O(3B)-C(7B)-H(7BB)   | 110.9     |
| C(6B)-C(7B)-H(7BB)   | 110.9     |
| H(7BA)-C(7B)-H(7BB)  | 108.9     |
| C(9B)-C(8B)-C(10B)   | 111.0(13) |
| C(9B)-C(8B)-C(11B)   | 108.5(11) |
| C(10B)-C(8B)-C(11B)  | 108.1(10) |
| C(9B)-C(8B)-Si(1B)   | 107.2(8)  |
| C(10B)-C(8B)-Si(1B)  | 111.3(8)  |
| C(11B)-C(8B)-Si(1B)  | 110.7(8)  |
| C(8B)-C(9B)-H(9BA)   | 109.5     |
| C(8B)-C(9B)-H(9BB)   | 109.5     |
| H(9BA)-C(9B)-H(9BB)  | 109.5     |
| C(8B)-C(9B)-H(9BC)   | 109.5     |
| H(9BA)-C(9B)-H(9BC)  | 109.5     |
| H(9BB)-C(9B)-H(9BC)  | 109.5     |
| C(8B)-C(10B)-H(10D)  | 109.5     |
| C(8B)-C(10B)-H(10E)  | 109.5     |
| H(10D)-C(10B)-H(10E) | 109.5     |
| C(8B)-C(10B)-H(10F)  | 109.5     |
| H(10D)-C(10B)-H(10F) | 109.5     |
| H(10E)-C(10B)-H(10F) | 109.5     |
| C(8B)-C(11B)-H(11D)  | 109.5     |
| C(8B)-C(11B)-H(11E)  | 109.5     |
| H(11D)-C(11B)-H(11E) | 109.5     |
| C(8B)-C(11B)-H(11F)  | 109.5     |
| H(11D)-C(11B)-H(11F) | 109.5     |
| H(11E)-C(11B)-H(11F) | 109.5     |
| C(15B)-C(12B)-C(14B) | 106.9(9)  |
| C(15B)-C(12B)-C(13B) | 106.3(10) |
| C(14B)-C(12B)-C(13B) | 109.4(12) |
| C(15B)-C(12B)-Si(1B) | 114.5(8)  |
| C(14B)-C(12B)-Si(1B) | 111.7(8)  |

|                      |          |
|----------------------|----------|
| C(13B)-C(12B)-Si(1B) | 107.8(7) |
| C(12B)-C(13B)-H(13D) | 109.5    |
| C(12B)-C(13B)-H(13E) | 109.5    |
| H(13D)-C(13B)-H(13E) | 109.5    |
| C(12B)-C(13B)-H(13F) | 109.5    |
| H(13D)-C(13B)-H(13F) | 109.5    |
| H(13E)-C(13B)-H(13F) | 109.5    |
| C(12B)-C(14B)-H(14D) | 109.5    |
| C(12B)-C(14B)-H(14E) | 109.5    |
| H(14D)-C(14B)-H(14E) | 109.5    |
| C(12B)-C(14B)-H(14F) | 109.5    |
| H(14D)-C(14B)-H(14F) | 109.5    |

|                      |       |
|----------------------|-------|
| H(14E)-C(14B)-H(14F) | 109.5 |
| C(12B)-C(15B)-H(15D) | 109.5 |
| C(12B)-C(15B)-H(15E) | 109.5 |
| H(15D)-C(15B)-H(15E) | 109.5 |
| C(12B)-C(15B)-H(15F) | 109.5 |
| H(15D)-C(15B)-H(15F) | 109.5 |
| H(15E)-C(15B)-H(15F) | 109.5 |

---

Symmetry transformations used to generate  
equivalent atoms:

Table S4. Anisotropic displacement parameters ( $\text{\AA}^2 \times 10^3$ ) for HgCl(C<sub>15</sub>H<sub>29</sub>O<sub>3</sub>Si). The anisotropic displacement factor exponent takes the form:  $-2\pi^2 [h^2 a^{*2} U^{11} + \dots + 2 h k a^* b^* U^{12}]$

|        | U <sup>11</sup> | U <sup>22</sup> | U <sup>33</sup> | U <sup>23</sup> | U <sup>13</sup> | U <sup>12</sup> |
|--------|-----------------|-----------------|-----------------|-----------------|-----------------|-----------------|
| Hg(1A) | 33(1)           | 38(1)           | 42(1)           | -12(1)          | -3(1)           | -11(1)          |
| Cl(1A) | 42(1)           | 42(1)           | 43(1)           | -8(1)           | -7(1)           | -7(1)           |
| Si(1A) | 28(1)           | 35(1)           | 38(1)           | -10(1)          | -2(1)           | -4(1)           |
| O(1A)  | 62(4)           | 38(3)           | 41(3)           | -9(3)           | -12(3)          | -5(3)           |
| O(2A)  | 36(3)           | 33(3)           | 35(3)           | -8(2)           | -2(2)           | -7(2)           |
| O(3A)  | 62(5)           | 65(5)           | 83(5)           | -37(4)          | 27(4)           | -30(4)          |
| C(1A)  | 59(6)           | 43(5)           | 38(4)           | -12(4)          | -3(4)           | -17(4)          |
| C(2A)  | 34(4)           | 36(4)           | 31(4)           | -7(3)           | -1(3)           | -5(3)           |
| C(3A)  | 26(4)           | 35(4)           | 41(4)           | -9(3)           | -3(3)           | -6(3)           |
| C(4A)  | 32(4)           | 41(5)           | 36(4)           | -6(3)           | -3(3)           | -4(3)           |
| C(5A)  | 40(5)           | 44(5)           | 51(5)           | -11(4)          | 7(4)            | -16(4)          |
| C(6A)  | 44(5)           | 44(5)           | 50(5)           | -2(4)           | -1(4)           | -1(4)           |
| C(7A)  | 57(6)           | 39(5)           | 61(6)           | -15(4)          | 5(5)            | -7(4)           |
| C(8A)  | 43(5)           | 62(6)           | 51(5)           | -13(5)          | 9(4)            | -8(5)           |
| C(9A)  | 34(7)           | 220(20)         | 87(10)          | -48(12)         | 17(6)           | -12(10)         |
| C(10A) | 90(10)          | 69(8)           | 90(9)           | -34(7)          | 43(8)           | -15(7)          |
| C(11A) | 118(13)         | 93(11)          | 76(9)           | 5(8)            | 50(9)           | -22(9)          |
| C(12A) | 38(5)           | 55(6)           | 60(6)           | -26(5)          | -13(4)          | 6(4)            |
| C(13A) | 44(6)           | 114(11)         | 67(7)           | -37(7)          | -6(5)           | 2(7)            |
| C(14A) | 44(6)           | 78(8)           | 115(10)         | -43(8)          | -25(6)          | -9(6)           |
| C(15A) | 96(11)          | 88(9)           | 66(7)           | -25(7)          | -38(7)          | 39(8)           |
| Hg(1B) | 38(1)           | 36(1)           | 43(1)           | -12(1)          | -4(1)           | -11(1)          |
| Cl(1B) | 52(1)           | 45(1)           | 44(1)           | -10(1)          | -8(1)           | -6(1)           |
| Si(1B) | 30(1)           | 34(1)           | 39(1)           | -10(1)          | -4(1)           | -3(1)           |
| O(1B)  | 83(5)           | 36(3)           | 49(4)           | -11(3)          | -20(3)          | 4(3)            |
| O(2B)  | 33(3)           | 37(3)           | 40(3)           | -9(2)           | -3(2)           | -4(2)           |
| O(3B)  | 73(5)           | 58(4)           | 85(5)           | -36(4)          | 35(4)           | -36(4)          |
| C(1B)  | 70(7)           | 33(5)           | 41(5)           | -7(4)           | -14(4)          | -10(4)          |
| C(2B)  | 38(4)           | 30(4)           | 35(4)           | -9(3)           | 0(3)            | -14(3)          |
| C(3B)  | 24(4)           | 36(4)           | 41(4)           | -13(3)          | -4(3)           | 0(3)            |
| C(4B)  | 31(4)           | 37(4)           | 41(4)           | -7(3)           | 2(3)            | -6(3)           |

|        |        |         |         |         |        |         |
|--------|--------|---------|---------|---------|--------|---------|
| C(5B)  | 33(5)  | 45(5)   | 47(5)   | -7(4)   | 7(3)   | -14(4)  |
| C(6B)  | 47(6)  | 37(5)   | 53(5)   | -9(4)   | -6(4)  | 12(4)   |
| C(7B)  | 55(6)  | 38(5)   | 60(6)   | -14(4)  | 11(4)  | -10(4)  |
| C(8B)  | 42(5)  | 63(6)   | 50(5)   | -5(4)   | 3(4)   | -13(5)  |
| C(9B)  | 38(7)  | 210(20) | 68(8)   | -11(10) | 3(5)   | -30(10) |
| C(10B) | 86(10) | 88(10)  | 84(9)   | -25(8)  | 35(8)  | 9(8)    |
| C(11B) | 79(9)  | 100(10) | 62(7)   | 12(7)   | 18(6)  | -22(8)  |
| C(12B) | 27(5)  | 75(7)   | 51(5)   | -19(5)  | -9(4)  | 0(4)    |
| C(13B) | 19(5)  | 220(20) | 71(8)   | -53(10) | -10(5) | 10(8)   |
| C(14B) | 83(10) | 86(10)  | 101(10) | -17(8)  | -31(8) | -42(8)  |
| C(15B) | 54(7)  | 88(9)   | 59(6)   | -15(6)  | -18(5) | 20(6)   |

---

Table S5. Hydrogen coordinates ( $\times 10^4$ ) and isotropic displacement parameters ( $\text{\AA}^2 \times 10^{-3}$ ) for HgCl(C<sub>15</sub>H<sub>29</sub>O<sub>3</sub>Si).

|        | x    | y     | z    | U(eq) |
|--------|------|-------|------|-------|
| H(1AA) | 1326 | -1551 | 7126 | 55    |
| H(1AB) | 2740 | -2347 | 6940 | 55    |
| H(2AA) | 3972 | -674  | 6419 | 40    |
| H(3AA) | 1291 | 621   | 6699 | 40    |
| H(4AA) | 2309 | 1543  | 5561 | 43    |
| H(5AA) | 5040 | 1075  | 6256 | 53    |
| H(5AB) | 4734 | 1587  | 5399 | 53    |
| H(6AA) | 1852 | 3314  | 5827 | 56    |
| H(6AB) | 1564 | 2672  | 6658 | 56    |
| H(7AA) | 3629 | 4082  | 6432 | 62    |
| H(7AB) | 3918 | 2904  | 7024 | 62    |
| H(9AA) | -561 | 258   | 8599 | 167   |
| H(9AB) | 141  | -586  | 8072 | 167   |
| H(9AC) | 308  | 784   | 7868 | 167   |
| H(10A) | 1045 | 1236  | 9331 | 120   |
| H(10B) | 1983 | 1749  | 8621 | 120   |
| H(10C) | 2815 | 993   | 9325 | 120   |
| H(11A) | 702  | -942  | 9616 | 146   |
| H(11B) | 2479 | -1034 | 9682 | 146   |
| H(11C) | 1673 | -1759 | 9156 | 146   |
| H(13A) | 7288 | -794  | 8018 | 109   |
| H(13B) | 6177 | -226  | 7362 | 109   |
| H(13C) | 5983 | -1523 | 7782 | 109   |
| H(14A) | 6633 | 914   | 8684 | 113   |
| H(14B) | 4912 | 1285  | 8787 | 113   |
| H(14C) | 5626 | 1447  | 7980 | 113   |
| H(15A) | 6529 | -1053 | 9290 | 125   |
| H(15B) | 5280 | -1870 | 9098 | 125   |
| H(15C) | 4831 | -804  | 9511 | 125   |
| H(1BA) | 6859 | 3151  | 7127 | 57    |

|        |       |      |      |     |
|--------|-------|------|------|-----|
| H(1BB) | 8410  | 2564 | 6901 | 57  |
| H(2BA) | 9205  | 4405 | 6373 | 40  |
| H(3BA) | 6290  | 5332 | 6693 | 40  |
| H(4BA) | 7063  | 6407 | 5563 | 43  |
| H(5BA) | 9873  | 6269 | 6210 | 49  |
| H(5BB) | 9459  | 6675 | 5353 | 49  |
| H(6BA) | 6273  | 8104 | 5865 | 55  |
| H(6BB) | 6223  | 7433 | 6706 | 55  |
| H(7BA) | 7980  | 9091 | 6394 | 60  |
| H(7BB) | 8557  | 7949 | 6964 | 60  |
| H(9BA) | 4648  | 4489 | 8685 | 161 |
| H(9BB) | 5550  | 3886 | 8086 | 161 |
| H(9BC) | 5255  | 5268 | 7956 | 161 |
| H(10D) | 5929  | 5808 | 9357 | 129 |
| H(10E) | 6852  | 6453 | 8678 | 129 |
| H(10F) | 7710  | 5746 | 9390 | 129 |
| H(11D) | 6210  | 3486 | 9614 | 124 |
| H(11E) | 7918  | 3763 | 9679 | 124 |
| H(11F) | 7448  | 2927 | 9130 | 124 |
| H(13D) | 12431 | 4995 | 7828 | 150 |
| H(13E) | 11110 | 5084 | 7240 | 150 |
| H(13F) | 11568 | 3867 | 7753 | 150 |
| H(14D) | 11407 | 6415 | 8556 | 132 |
| H(14E) | 9675  | 6473 | 8760 | 132 |
| H(14F) | 10184 | 6778 | 7918 | 132 |
| H(15D) | 11863 | 4472 | 9163 | 101 |
| H(15E) | 10869 | 3447 | 9018 | 101 |
| H(15F) | 10178 | 4435 | 9445 | 101 |

---

Table S6. Torsion angles [°] for  
HgCl(C<sub>15</sub>H<sub>29</sub>O<sub>3</sub>Si).

|                            |           |
|----------------------------|-----------|
| O(2A)-Si(1A)-O(1A)-C(1A)   | -118.5(8) |
| C(8A)-Si(1A)-O(1A)-C(1A)   | 99.9(8)   |
| O(1A)-Si(1A)-O(2A)-C(3A)   | 21.1(7)   |
| C(12A)-Si(1A)-O(2A)-C(3A)  | 135.6(6)  |
| C(8A)-Si(1A)-O(2A)-C(3A)   | -97.1(7)  |
| Si(1A)-O(1A)-C(1A)-C(2A)   | 38.5(11)  |
| O(1A)-C(1A)-C(2A)-C(3A)    | -59.8(10) |
| O(1A)-C(1A)-C(2A)-Hg(1A)   | 175.7(6)  |
| Si(1A)-O(2A)-C(3A)-C(2A)   | -42.5(8)  |
| Si(1A)-O(2A)-C(3A)-C(4A)   | -168.0(5) |
| C(1A)-C(2A)-C(3A)-O(2A)    | 60.4(9)   |
| Hg(1A)-C(2A)-C(3A)-O(2A)   | -178.4(5) |
| C(1A)-C(2A)-C(3A)-C(4A)    | 179.8(7)  |
| Hg(1A)-C(2A)-C(3A)-C(4A)   | -59.0(8)  |
| O(2A)-C(3A)-C(4A)-C(5A)    | 59.5(9)   |
| C(2A)-C(3A)-C(4A)-C(5A)    | -61.7(10) |
| O(2A)-C(3A)-C(4A)-C(6A)    | -57.9(8)  |
| C(2A)-C(3A)-C(4A)-C(6A)    | -179.1(7) |
| C(7A)-O(3A)-C(5A)-C(4A)    | 23.7(11)  |
| C(6A)-C(4A)-C(5A)-O(3A)    | -1.3(10)  |
| C(3A)-C(4A)-C(5A)-O(3A)    | -123.4(8) |
| C(5A)-C(4A)-C(6A)-C(7A)    | -20.0(9)  |
| C(3A)-C(4A)-C(6A)-C(7A)    | 103.4(8)  |
| C(5A)-O(3A)-C(7A)-C(6A)    | -36.6(11) |
| C(4A)-C(6A)-C(7A)-O(3A)    | 34.4(10)  |
| O(1A)-Si(1A)-C(8A)-C(9A)   | -65.4(11) |
| O(2A)-Si(1A)-C(8A)-C(9A)   | 50.7(11)  |
| C(12A)-Si(1A)-C(8A)-C(9A)  | 172.3(10) |
| O(1A)-Si(1A)-C(8A)-C(10A)  | 175.5(9)  |
| O(2A)-Si(1A)-C(8A)-C(10A)  | -68.4(10) |
| C(12A)-Si(1A)-C(8A)-C(10A) | 53.2(11)  |
| O(1A)-Si(1A)-C(8A)-C(11A)  | 53.8(10)  |

|                            |           |
|----------------------------|-----------|
| O(2A)-Si(1A)-C(8A)-C(11A)  | 170.0(9)  |
| C(12A)-Si(1A)-C(8A)-C(11A) | -68.5(11) |
| O(1A)-Si(1A)-C(12A)-C(13A) | 44.9(9)   |
| O(2A)-Si(1A)-C(12A)-C(13A) | -68.7(9)  |
| C(8A)-Si(1A)-C(12A)-C(13A) | 168.2(8)  |
| O(1A)-Si(1A)-C(12A)-C(15A) | -73.1(8)  |
| O(2A)-Si(1A)-C(12A)-C(15A) | 173.2(7)  |
| C(8A)-Si(1A)-C(12A)-C(15A) | 50.2(9)   |
| O(1A)-Si(1A)-C(12A)-C(14A) | 164.9(8)  |
| O(2A)-Si(1A)-C(12A)-C(14A) | 51.2(9)   |
| C(8A)-Si(1A)-C(12A)-C(14A) | -71.8(10) |
| O(2B)-Si(1B)-O(1B)-C(1B)   | -18.8(9)  |
| C(12B)-Si(1B)-O(1B)-C(1B)  | -132.9(8) |
| C(8B)-Si(1B)-O(1B)-C(1B)   | 99.1(8)   |
| O(1B)-Si(1B)-O(2B)-C(3B)   | 18.7(7)   |
| C(12B)-Si(1B)-O(2B)-C(3B)  | 133.8(6)  |
| C(8B)-Si(1B)-O(2B)-C(3B)   | -99.1(7)  |
| Si(1B)-O(1B)-C(1B)-C(2B)   | 40.3(12)  |
| O(1B)-C(1B)-C(2B)-C(3B)    | -60.4(11) |
| O(1B)-C(1B)-C(2B)-Hg(1B)   | 176.0(7)  |
| Si(1B)-O(2B)-C(3B)-C(2B)   | -38.6(8)  |
| Si(1B)-O(2B)-C(3B)-C(4B)   | -164.2(5) |
| C(1B)-C(2B)-C(3B)-O(2B)    | 58.5(9)   |
| Hg(1B)-C(2B)-C(3B)-O(2B)   | -179.4(5) |
| C(1B)-C(2B)-C(3B)-C(4B)    | 178.6(7)  |
| Hg(1B)-C(2B)-C(3B)-C(4B)   | -59.3(8)  |
| O(2B)-C(3B)-C(4B)-C(6B)    | -54.7(9)  |
| C(2B)-C(3B)-C(4B)-C(6B)    | -176.5(7) |
| O(2B)-C(3B)-C(4B)-C(5B)    | 63.0(8)   |
| C(2B)-C(3B)-C(4B)-C(5B)    | -58.8(9)  |
| C(7B)-O(3B)-C(5B)-C(4B)    | 27.8(11)  |
| C(3B)-C(4B)-C(5B)-O(3B)    | -127.4(8) |
| C(6B)-C(4B)-C(5B)-O(3B)    | -5.1(9)   |
| C(3B)-C(4B)-C(6B)-C(7B)    | 106.0(8)  |
| C(5B)-C(4B)-C(6B)-C(7B)    | -17.5(9)  |
| C(5B)-O(3B)-C(7B)-C(6B)    | -39.4(11) |



|                            |           |                            |           |
|----------------------------|-----------|----------------------------|-----------|
| C(4B)-C(6B)-C(7B)-O(3B)    | 34.7(10)  | C(8B)-Si(1B)-C(12B)-C(15B) | 49.8(10)  |
| O(1B)-Si(1B)-C(8B)-C(9B)   | -64.6(11) | O(1B)-Si(1B)-C(12B)-C(14B) | 164.4(8)  |
| O(2B)-Si(1B)-C(8B)-C(9B)   | 51.2(11)  | O(2B)-Si(1B)-C(12B)-C(14B) | 50.7(9)   |
| C(12B)-Si(1B)-C(8B)-C(9B)  | 172.3(11) | C(8B)-Si(1B)-C(12B)-C(14B) | -71.9(10) |
| O(1B)-Si(1B)-C(8B)-C(10B)  | 173.8(9)  | O(1B)-Si(1B)-C(12B)-C(13B) | 44.2(10)  |
| O(2B)-Si(1B)-C(8B)-C(10B)  | -70.4(10) | O(2B)-Si(1B)-C(12B)-C(13B) | -69.5(10) |
| C(12B)-Si(1B)-C(8B)-C(10B) | 50.7(11)  | C(8B)-Si(1B)-C(12B)-C(13B) | 167.9(9)  |
| O(1B)-Si(1B)-C(8B)-C(11B)  | 53.6(9)   |                            |           |
| O(2B)-Si(1B)-C(8B)-C(11B)  | 169.4(8)  |                            |           |
| C(12B)-Si(1B)-C(8B)-C(11B) | -69.5(10) |                            |           |
| O(1B)-Si(1B)-C(12B)-C(15B) | -73.9(8)  |                            |           |
| O(2B)-Si(1B)-C(12B)-C(15B) | 172.4(7)  |                            |           |

---

Symmetry transformations used to generate  
equivalent atoms:

Table S7. Hydrogen bonds for HgCl(C<sub>15</sub>H<sub>29</sub>O<sub>3</sub>Si) [ $\text{\AA}$  and  $^\circ$ ].

| D-H...A                 | d(D-H) | d(H...A) | d(D...A)  | <(DHA) |
|-------------------------|--------|----------|-----------|--------|
| C(3A)-H(3AA)...Cl(1A)#1 | 1.00   | 2.90     | 3.647(8)  | 131.7  |
| C(7A)-H(7AA)...Cl(1B)#2 | 0.99   | 2.83     | 3.768(11) | 158.5  |
| C(1B)-H(1BB)...Cl(1A)#3 | 0.99   | 2.95     | 3.799(10) | 144.4  |
| C(7B)-H(7BA)...Cl(1A)#2 | 0.99   | 2.83     | 3.674(10) | 143.9  |

Symmetry transformations used to generate equivalent atoms:

#1 -x,-y,-z+1   #2 -x+1,-y+1,-z+1   #3 -x+1,-y,-z+1

## VII: Computational Procedures and Results

Calculations were performed at home on a desktop gaming PC running Windows 10 with an Intel® Core™ i7-8700K CPU @ 3.70 GHz (6 CPUs) and 16 GB of RAM. The ORCA DFT package<sup>1,2</sup> was used for all DFT calculations. Calculation inputs were prepared using Avogadro<sup>3</sup>, and when multiple conformers were possible, a systematic rotor search was performed to identify the lowest energy conformer as a starting point. DFT outputs were analyzed and visualized using Chemcraft<sup>4</sup>. DFT calculations were performed using the B3LYP<sup>5,6</sup> functional with the RIJCOSX approximation and D3BJ<sup>7,8</sup> dispersion correction using the def2-TZVP<sup>9</sup> basis set and def2/J<sup>10</sup> auxiliary basis set for RIJCOSX. For calculations involving mercury, the DEF2-ECP was automatically applied by ORCA, replacing 60 core electrons.<sup>11</sup> The SMD solvation module<sup>12</sup> was used to model implicit water solvation. The larger solvent accessible surface (SAS) was used instead of the default smaller solvent excluded surface (SES) on account of geometry convergence issues with the latter. For cationic mercuronium species, the chloride counterion was not explicitly modeled.

### Example ORCA Input card for a groundstate opt-freq job:

```
! RKS RIJCOSX B3LYP D3BJ def2-TZVP def2/J      #Level of theory
! Grid5 FinalGrid6 GridX7 tightSCF slowconv     #Tight grids lead to best results
! OPT FREQ
! pal6                                           #6 CPUs used on local machine
%maxcore 2048                                   #2GB RAM allocated per CPU
! CPCM(Water)                                   #Implicit water solvation
%cpcm
smd true SMDsolvent "water"
surfacetype gepol_sas                           #Solvent accessible surface (SAS) used
end

* xyz 0 1
#Atomic coordinates go here
*
```

<sup>1</sup> Neese, F. The ORCA program system. Wiley Interdiscip. Rev.: Comput. Mol. Sci. **2012**, 2, 73–78.

<sup>2</sup> Neese, F. Software update: the ORCA program system, version 4.0. Wiley Interdiscip. Rev.: Comput. Mol. Sci. **2017**, 8, e1327.

<sup>3</sup> Hanwell, M. D.; Curtis, D. E.; Lonie, D. C.; Vandermeersch, T.; Zurek, E.; Hutchinson, G. R. Avogadro: an advanced semantic chemical editor, visualization, and analysis platform. *Journal of Cheminformatics* **2012**, 4:17.

<sup>4</sup> <https://www.chemcraftprog.com>

<sup>5</sup> Becke, A. D. A new mixing of Hartree–Fock and local density-functional theories. *J. Chem. Phys.* **1993**, 98, 5648–5653.

<sup>6</sup> Lee, C.; Yang, W.; Parr, R. G. Development of the Colle-Salvetti correlation-energy formula into a functional of the electron density. *Phys. Rev. B* **1988**, 37, 785–789.

<sup>7</sup> Grimme, S.; Ehrlich, S.; Goerigk, L. Effect of the damping function in dispersion corrected density functional theory. *J. Comput. Chem.* **2011**, 32, 1456–1465.

<sup>8</sup> Grimme, S.; Antony, J.; Ehrlich, S.; Krieg, H. A consistent and accurate ab initio parametrization of density functional dispersion correction (DFT-D) for the 94 elements H–Pu. *J. Chem. Phys.* **2010**, 132, 154104.

<sup>9</sup> Weigend, F.; Ahlrichs, R. Balanced basis sets of split valence, triple zeta valence and quadruple zeta valence quality for H to Rn: Design and assessment of accuracy. *Phys. Chem. Chem. Phys.* **2005**, 7, 3297–3305.

<sup>10</sup> Weigend, F. Accurate Coulomb-fitting basis sets for H to Rn. *Phys. Chem. Chem. Phys.* **2006**, 8, 1057–1065.

<sup>11</sup> Andraw, D.; Haeussermann, U.; Dolg, M.; Stoll, H.; Preuss, H. Energy-adjusted *ab initio* pseudopotentials for the second and third row transition elements. *Theor. Chim. Acta*, **1990**, 77, 123–141.

<sup>12</sup> Marenich, A. V.; Cramer, C. J.; Truhlar, D. G. Universal Solvation Model Based on Solute Electron Density and on a Continuum Model of the Solvent Defined by the Bulk Dielectric Constant and Atomic Surface Tensions. *J. Phys. Chem. B*, **2009**, 113, 6378–6396.

### HCl

Level of theory: B3LYP D3BJ RIJCOSX  
def2/TZVP SMD H2O (SAS)

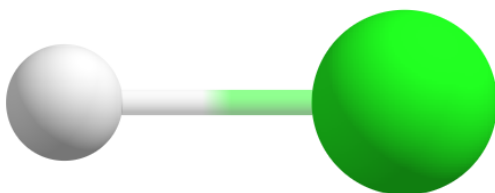

Electronic Energy (Hartree): -460.765563  
Gibbs Free Energy (Hartree): -460.776775  
Negative Frequencies (cm<sup>-1</sup>): None  
Molecular Dipole (Debye): 1.30  
Coordinates (Charge 0, Multiplicity 1):  
H -7.49248 0.50985 0.00000  
Cl -6.21134 0.56348 0.00000

### HgCl<sub>2</sub>

Level of theory: B3LYP D3BJ RIJCOSX  
def2/TZVP SMD H2O (SAS)

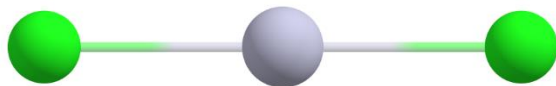

Electronic Energy (Hartree): -1073.868082  
Gibbs Free Energy (Hartree): -1073.892515  
Negative Frequencies (cm<sup>-1</sup>): None  
Molecular Dipole (Debye): 0.00  
Coordinates (Charge 0, Multiplicity 1):  
Cl 0.00000 0.00000 -2.28629  
Hg 0.00000 0.00000 0.00000  
Cl 0.00000 0.00000 2.28629

### (E)-2-buten-1-ol

Level of theory: B3LYP D3BJ RIJCOSX  
def2/TZVP SMD H2O (SAS)

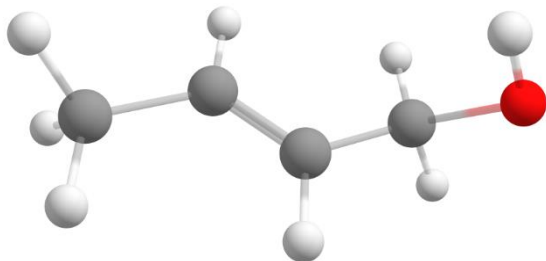

Electronic Energy (Hartree): -232.399713  
Gibbs Free Energy (Hartree): -232.316197  
Negative Frequencies (cm<sup>-1</sup>): None

Molecular Dipole (Debye): 2.34

Coordinates (Charge 0, Multiplicity 1):

|   |           |         |          |
|---|-----------|---------|----------|
| C | -9.88860  | 4.12688 | -1.66922 |
| C | -6.93634  | 2.54293 | 0.32562  |
| O | -6.44475  | 1.25241 | -0.05782 |
| H | -7.20325  | 0.73302 | -0.34847 |
| C | -7.75553  | 3.17726 | -0.74947 |
| C | -9.03707  | 3.50351 | -0.61326 |
| H | -10.27177 | 5.09791 | -1.34175 |
| H | -9.33579  | 4.27501 | -2.59777 |
| H | -10.76273 | 3.50585 | -1.88583 |
| H | -6.04105  | 3.13296 | 0.53450  |
| H | -7.51593  | 2.47686 | 1.25417  |
| H | -7.24939  | 3.34820 | -1.69655 |
| H | -9.52066  | 3.31382 | 0.34299  |

### (R)-3-Buten-2-ol

Level of theory: B3LYP D3BJ RIJCOSX  
def2/TZVP SMD H2O (SAS)

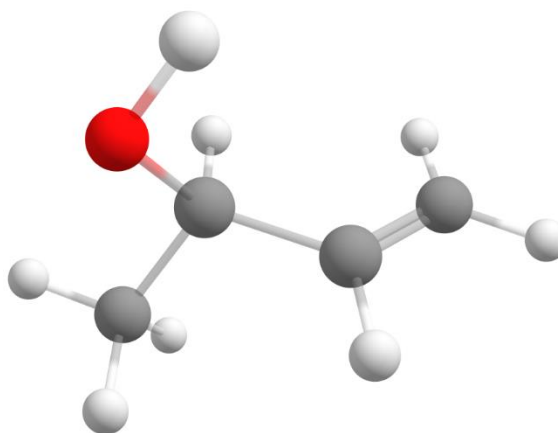

Electronic Energy (Hartree): -232.399350  
Gibbs Free Energy (Hartree): -232.315705  
Negative Frequencies (cm<sup>-1</sup>): None  
Molecular Dipole (Debye): 1.61

Coordinates (Charge 0, Multiplicity 1):

|   |           |          |          |
|---|-----------|----------|----------|
| O | -7.66265  | -1.01086 | 0.07424  |
| C | -8.12187  | -3.28977 | -0.38280 |
| C | -9.38108  | -2.26548 | 2.80438  |
| H | -7.65891  | -0.32263 | 0.74910  |
| C | -9.27950  | -2.09474 | 1.49329  |
| C | -8.00665  | -2.24983 | 0.71643  |
| H | -8.32827  | -4.27284 | 0.04191  |
| H | -8.92913  | -3.03139 | -1.07075 |
| H | -7.19130  | -3.34308 | -0.94950 |
| H | -10.32144 | -2.13791 | 3.32560  |
| H | -8.52382  | -2.54586 | 3.40691  |
| H | -10.14901 | -1.80842 | 0.90710  |
| H | -7.20320  | -2.53965 | 1.40555  |

**(E)-4-methylpent-2-en-1-ol**

Level of theory: B3LYP D3BJ RIJCOSX  
def2/TZVP SMD H2O (SAS)

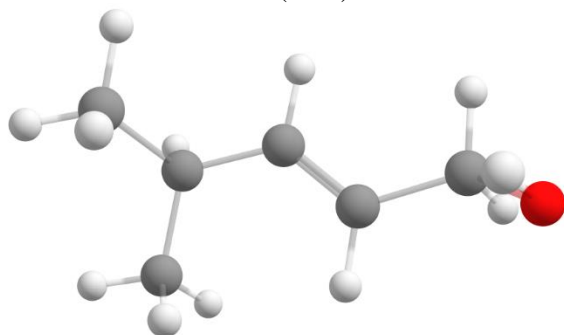

Electronic Energy (Hartree): -311.006746

Gibbs Free Energy (Hartree): -310.869951

Negative Frequencies (cm<sup>-1</sup>): None

Molecular Dipole (Debye): 2.43

Coordinates (Charge 0, Multiplicity 1):

|   |           |         |          |
|---|-----------|---------|----------|
| C | -9.02855  | 5.09646 | -0.17725 |
| C | -9.34797  | 1.47277 | -1.63555 |
| O | -8.98213  | 0.35682 | -0.81368 |
| H | -8.24284  | 0.63940 | -0.26300 |
| C | -9.59387  | 2.70713 | -0.83108 |
| C | -8.88041  | 3.82168 | -0.95920 |
| C | -10.16848 | 5.07931 | 0.83572  |
| C | -7.69612  | 5.44809 | 0.49901  |
| H | -9.23687  | 5.89073 | -0.90630 |
| H | -10.25672 | 1.15444 | -2.15146 |
| H | -8.58081  | 1.66130 | -2.39597 |
| H | -10.39085 | 2.63845 | -0.09778 |
| H | -8.08501  | 3.83565 | -1.70293 |
| H | -10.24225 | 6.04441 | 1.33992  |
| H | -11.13017 | 4.87867 | 0.36054  |
| H | -10.00543 | 4.31859 | 1.60295  |
| H | -7.75554  | 6.41915 | 0.99446  |
| H | -6.87963  | 5.49101 | -0.22465 |
| H | -7.43701  | 4.69931 | 1.25138  |

**(R)-4-methylpent-1-en-3-ol**

Level of theory: B3LYP D3BJ RIJCOSX  
def2/TZVP SMD H2O (SAS)

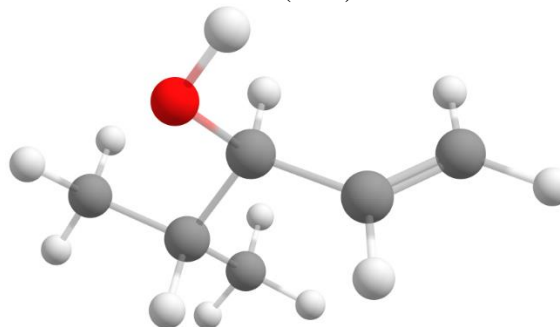

Electronic Energy (Hartree): -311.006503

Gibbs Free Energy (Hartree): -310.869977

Negative Frequencies (cm<sup>-1</sup>): None

Molecular Dipole (Debye): 1.53

Coordinates (Charge 0, Multiplicity 1):

|   |          |          |          |
|---|----------|----------|----------|
| O | -5.70623 | -0.28706 | 0.36927  |
| C | -6.78241 | -2.42326 | 0.31385  |
| C | -4.00264 | -2.27956 | 2.59899  |
| H | -4.93498 | 0.19937  | 0.68033  |
| C | -5.15118 | -1.79784 | 2.14392  |
| C | -5.50143 | -1.67268 | 0.69258  |
| C | -7.12123 | -2.21437 | -1.16097 |
| C | -6.65992 | -3.91101 | 0.63894  |
| H | -7.58959 | -1.99594 | 0.91955  |
| H | -3.78723 | -2.33700 | 3.65855  |
| H | -3.23376 | -2.64108 | 1.92492  |
| H | -5.90771 | -1.43803 | 2.83660  |
| H | -4.67462 | -2.07219 | 0.08837  |
| H | -8.05436 | -2.72101 | -1.41607 |
| H | -7.22900 | -1.15766 | -1.39984 |
| H | -6.33545 | -2.62699 | -1.80058 |
| H | -7.57391 | -4.43865 | 0.36071  |
| H | -6.48010 | -4.08602 | 1.70001  |
| H | -5.83447 | -4.36567 | 0.08391  |

**Methyl substrate – Neutral SM (1)**

Level of theory: B3LYP D3BJ RIJCOSX

def2/TZVP SMD H2O (SAS)

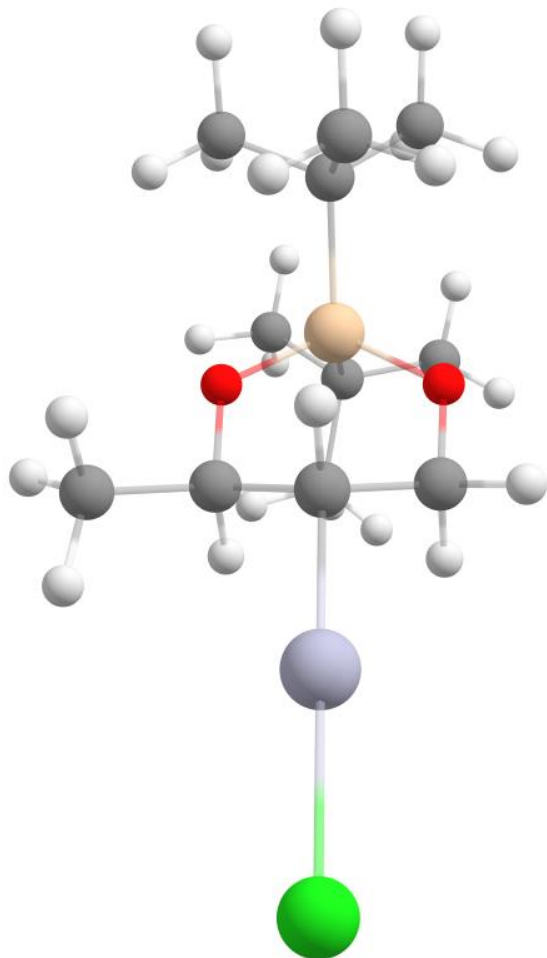

|   |          |          |          |
|---|----------|----------|----------|
| H | -1.25959 | 0.19263  | 0.00633  |
| C | 2.42229  | -2.00161 | 2.64213  |
| C | 0.95697  | -1.27070 | 4.52304  |
| C | 3.09720  | -0.04713 | 4.04761  |
| C | -0.50356 | 2.60591  | 1.68365  |
| C | 1.67327  | 2.98806  | 2.84011  |
| C | -0.26997 | 2.02325  | 4.10044  |
| H | 3.11459  | -1.71751 | 1.84838  |
| H | 1.60479  | -2.57001 | 2.19390  |
| H | 2.95257  | -2.67484 | 3.32377  |
| H | 3.77843  | 0.35322  | 3.29349  |
| H | 3.67175  | -0.73839 | 4.67352  |
| H | 2.78085  | 0.77772  | 4.68793  |
| H | 0.08493  | -1.77945 | 4.10880  |
| H | 0.60012  | -0.45945 | 5.15808  |
| H | 1.48077  | -1.98246 | 5.17022  |
| H | -0.03667 | 2.65808  | 0.69744  |
| H | -0.80703 | 3.62421  | 1.94882  |
| H | -1.41075 | 2.00496  | 1.60177  |
| H | -1.11439 | 1.33038  | 4.09747  |
| H | -0.66385 | 3.01798  | 4.33593  |
| H | 0.39524  | 1.74038  | 4.91763  |
| H | 2.22115  | 3.02854  | 1.89720  |
| H | 2.37428  | 2.68555  | 3.61870  |
| H | 1.34387  | 4.00544  | 3.07778  |
| H | -2.22337 | -1.97540 | -0.65334 |
| H | -2.52707 | -1.69394 | 1.06123  |
| H | -1.24846 | -2.81113 | 0.57128  |

Electronic Energy (Hartree): -1525.935219

Gibbs Free Energy (Hartree): -1525.628521

Negative Frequencies (cm<sup>-1</sup>): None

Molecular Dipole (Debye): 3.04

Coordinates (Charge 0, Multiplicity 1):

|    |          |          |          |
|----|----------|----------|----------|
| Hg | -0.03506 | -1.37049 | -2.53174 |
| Cl | -0.58460 | -1.87400 | -4.75003 |
| Si | 0.97942  | 0.31910  | 2.18189  |
| O  | 1.92306  | 0.49527  | 0.83047  |
| O  | -0.35843 | -0.53638 | 1.70733  |
| C  | -0.75569 | -0.72150 | 0.34395  |
| C  | 0.48561  | -0.95193 | -0.52187 |
| C  | 1.45933  | 0.22159  | -0.48707 |
| C  | 0.45840  | 2.05181  | 2.75007  |
| C  | 1.90367  | -0.77783 | 3.41688  |
| C  | -1.74528 | -1.87129 | 0.32292  |
| H  | 0.99357  | -1.85346 | -0.17058 |
| H  | 2.33949  | 0.00862  | -1.09629 |
| H  | 0.98661  | 1.12210  | -0.89559 |

**Methyl Substrate – Internal Alkene Product  
(26)**

Level of theory: B3LYP D3BJ RIJCOSX  
def2/TZVP SMD H2O (SAS)

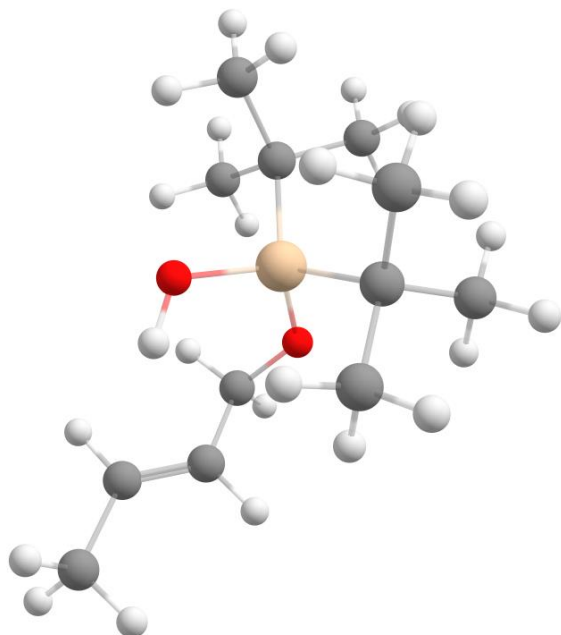

|   |          |          |          |
|---|----------|----------|----------|
| H | -9.58870 | 3.33942  | 0.24001  |
| H | -6.82157 | -0.19484 | -3.99789 |
| H | -6.90597 | 1.17904  | -2.89682 |
| H | -8.27329 | 0.06717  | -3.03550 |
| H | -6.76060 | -2.52925 | -3.14731 |
| H | -6.55520 | -2.89361 | -1.43900 |
| H | -8.11189 | -2.31215 | -2.03609 |
| H | -7.12011 | -0.83656 | 3.43434  |
| H | -6.51971 | 0.58262  | 2.57811  |
| H | -8.23520 | 0.15681  | 2.49676  |
| H | -7.81112 | -2.88356 | 2.25007  |
| H | -7.75023 | -3.02344 | 0.49651  |
| H | -8.95924 | -1.98699 | 1.25092  |
| H | -5.27375 | -2.38239 | 0.59616  |
| H | -4.76910 | -0.85897 | 1.33305  |
| H | -5.35370 | -2.18141 | 2.34166  |
| H | -4.68670 | 0.34623  | -1.86105 |
| H | -4.54623 | -1.31351 | -1.28610 |
| H | -4.71762 | -0.99644 | -3.00893 |

Electronic Energy (Hartree): -912.848375

Gibbs Free Energy (Hartree): -912.531882

Negative Frequencies (cm<sup>-1</sup>): None

Molecular Dipole (Debye): 2.17

Coordinates (Charge 0, Multiplicity 1):

|    |           |          |          |
|----|-----------|----------|----------|
| O  | -8.83096  | 0.19218  | -0.30482 |
| C  | -9.81970  | 4.24897  | -1.75372 |
| C  | -6.98953  | 2.59210  | 0.36769  |
| O  | -6.39953  | 1.37176  | -0.07325 |
| Si | -7.19316  | -0.07286 | -0.25305 |
| C  | -6.57496  | -0.75385 | -1.91287 |
| C  | -6.94260  | -1.14186 | 1.29157  |
| C  | -7.75231  | 3.25725  | -0.73499 |
| C  | -9.04240  | 3.57327  | -0.67181 |
| C  | -7.18317  | 0.12980  | -3.01644 |
| C  | -7.02991  | -2.20219 | -2.13699 |
| C  | -7.22229  | -0.25029 | 2.51468  |
| C  | -7.92371  | -2.32375 | 1.31487  |
| C  | -5.50321  | -1.66599 | 1.38656  |
| C  | -5.04456  | -0.67264 | -2.01445 |
| H  | -9.10823  | 0.96059  | -0.81453 |
| H  | -10.21284 | 5.21053  | -1.41106 |
| H  | -9.20706  | 4.42806  | -2.63806 |
| H  | -10.68529 | 3.65020  | -2.05163 |
| H  | -6.16595  | 3.23176  | 0.69727  |
| H  | -7.64258  | 2.42716  | 1.22972  |
| H  | -7.18473  | 3.47643  | -1.63573 |

**Methyl Substrate – Terminal Alkene Product  
(27)**

Level of theory: B3LYP D3BJ RIJCOSX  
def2/TZVP SMD H2O (SAS)

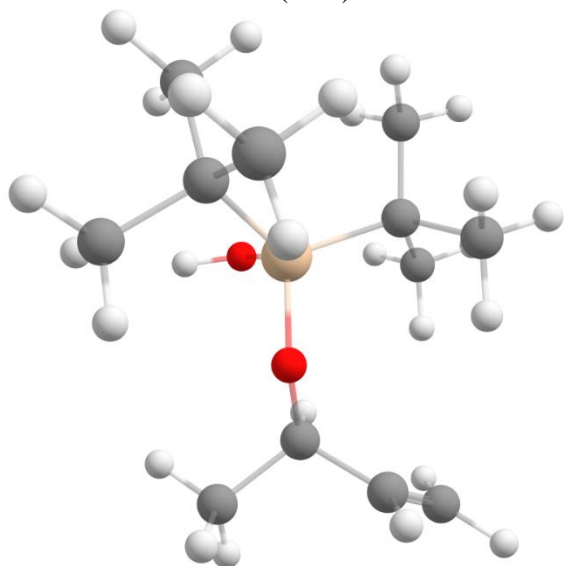

|   |          |          |          |
|---|----------|----------|----------|
| H | -7.35691 | -0.57023 | 3.13667  |
| H | -8.60592 | 2.19349  | 2.86223  |
| H | -8.70170 | 2.30139  | 1.10775  |
| H | -9.12617 | 0.79536  | 1.92011  |
| H | -6.41679 | 0.43043  | -3.45362 |
| H | -5.61151 | -0.68063 | -2.35723 |
| H | -7.37191 | -0.68112 | -2.46179 |
| H | -7.77908 | 2.32519  | -2.63864 |
| H | -7.86237 | 2.75228  | -0.93435 |
| H | -8.72968 | 1.33413  | -1.53059 |
| H | -5.31967 | 2.75190  | -0.77517 |
| H | -4.39371 | 1.34403  | -1.28106 |
| H | -5.21917 | 2.33631  | -2.48169 |
| H | -6.28269 | 3.12784  | 1.14357  |
| H | -6.16453 | 2.91023  | 2.88387  |
| H | -4.99527 | 2.12617  | 1.82180  |

Electronic Energy (Hartree): -912.846245

Gibbs Free Energy (Hartree): -912.530497

Negative Frequencies (cm<sup>-1</sup>): None

Molecular Dipole (Debye): 1.17

Coordinates (Charge 0, Multiplicity 1):

|    |           |          |          |
|----|-----------|----------|----------|
| O  | -7.89236  | -0.93656 | 0.07691  |
| C  | -8.11966  | -3.28644 | -0.30692 |
| C  | -9.53000  | -2.43674 | 2.78097  |
| O  | -5.23801  | -0.64139 | 0.59642  |
| Si | -6.66935  | 0.14899  | 0.29796  |
| C  | -6.97202  | 1.17538  | 1.86411  |
| C  | -6.56430  | 1.04349  | -1.37472 |
| C  | -9.38982  | -2.11527 | 1.50356  |
| C  | -8.09971  | -2.18361 | 0.74264  |
| C  | -6.68656  | 0.28912  | 3.09026  |
| C  | -8.43531  | 1.63911  | 1.93281  |
| C  | -6.49132  | -0.03909 | -2.46716 |
| C  | -7.80682  | 1.90941  | -1.62534 |
| C  | -5.30389  | 1.91582  | -1.47381 |
| C  | -6.04751  | 2.40001  | 1.92155  |
| H  | -8.27289  | -4.26060 | 0.15998  |
| H  | -8.92407  | -3.11328 | -1.02413 |
| H  | -7.17400  | -3.30554 | -0.85100 |
| H  | -10.49021 | -2.38641 | 3.27853  |
| H  | -8.68941  | -2.76994 | 3.37956  |
| H  | -4.83049  | -1.10159 | -0.14141 |
| H  | -10.24433 | -1.77824 | 0.92346  |
| H  | -7.27895  | -2.37419 | 1.44181  |
| H  | -6.84481  | 0.86882  | 4.00640  |
| H  | -5.66017  | -0.07818 | 3.09802  |



**Isopropyl Substrate – Neutral SM (4)**

Level of theory: B3LYP D3BJ RIJCOSX

def2/TZVP SMD H2O (SAS)

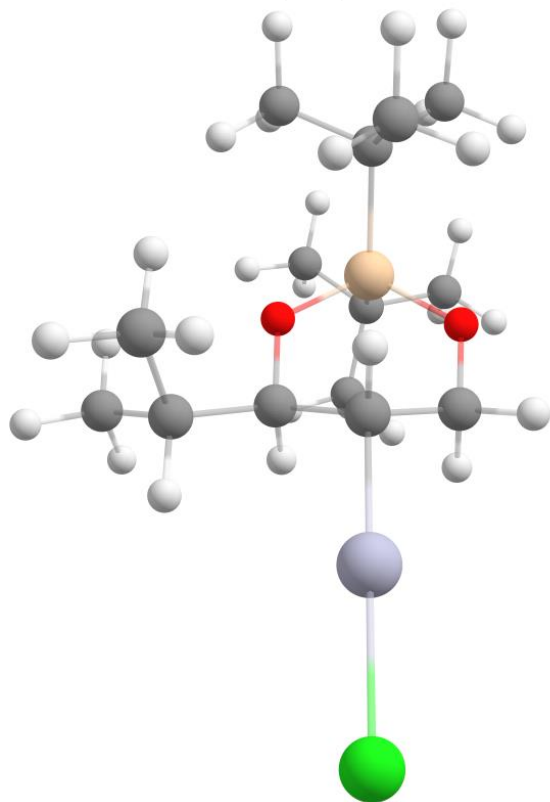

Electronic Energy (Hartree): -1604.544340

Gibbs Free Energy (Hartree): -1604.183764

Negative Frequencies (cm<sup>-1</sup>): None

Molecular Dipole (Debye): 3.22

Coordinates (Charge 0, Multiplicity 1):

|    |          |          |          |
|----|----------|----------|----------|
| Hg | -0.05238 | -1.42501 | -2.54001 |
| Cl | -0.60992 | -1.96279 | -4.74876 |
| Si | 0.96287  | 0.31561  | 2.15115  |
| O  | 1.90114  | 0.49601  | 0.79683  |
| O  | -0.38022 | -0.52865 | 1.67707  |
| C  | -0.77568 | -0.70725 | 0.31404  |
| C  | 0.46737  | -0.97017 | -0.53808 |
| C  | 1.44122  | 0.20383  | -0.51880 |
| C  | 0.44661  | 2.04533  | 2.73038  |
| C  | 1.88174  | -0.79419 | 3.37920  |
| C  | -1.85176 | -1.80113 | 0.27893  |
| C  | -1.32142 | -3.16654 | 0.71042  |
| C  | -3.05119 | -1.38595 | 1.12860  |
| H  | 0.97991  | -1.86011 | -0.17110 |
| H  | 2.32342  | -0.01844 | -1.12165 |
| H  | 0.97036  | 1.09913  | -0.94047 |
| H  | -2.19240 | -1.87232 | -0.76156 |
| H  | -2.12093 | -3.90872 | 0.68908  |
| H  | -0.52486 | -3.53192 | 0.05981  |

|   |          |          |          |
|---|----------|----------|----------|
| H | -0.93271 | -3.12283 | 1.72869  |
| H | -3.44367 | -0.41574 | 0.81552  |
| H | -2.77034 | -1.31089 | 2.17948  |
| H | -3.85766 | -2.11594 | 1.04217  |
| H | -1.23999 | 0.22452  | -0.03444 |
| C | 2.40943  | -2.00821 | 2.59534  |
| C | 0.92668  | -1.30104 | 4.47168  |
| C | 3.06833  | -0.06840 | 4.02814  |
| C | -0.51351 | 2.60592  | 1.66582  |
| C | 1.66200  | 2.97958  | 2.82842  |
| C | -0.28449 | 2.00666  | 4.07881  |
| H | 3.10799  | -1.71383 | 1.81093  |
| H | 1.59834  | -2.57425 | 2.13311  |
| H | 2.93528  | -2.68768 | 3.27420  |
| H | 3.75376  | 0.34374  | 3.28427  |
| H | 3.64072  | -0.76586 | 4.64908  |
| H | 2.74474  | 0.74712  | 4.67664  |
| H | 0.06229  | -1.81260 | 4.04490  |
| H | 0.55655  | -0.49706 | 5.10828  |
| H | 1.44757  | -2.01409 | 5.11969  |
| H | -0.04549 | 2.66183  | 0.68040  |
| H | -0.81611 | 3.62319  | 1.93572  |
| H | -1.42099 | 2.00613  | 1.58025  |
| H | -1.13069 | 1.31610  | 4.06736  |
| H | -0.67663 | 3.00018  | 4.32209  |
| H | 0.37790  | 1.71488  | 4.89508  |
| H | 2.21262  | 3.02381  | 1.88724  |
| H | 2.36022  | 2.67262  | 3.60769  |
| H | 1.33326  | 3.99632  | 3.06959  |

**Isopropyl Substrate – Internal Alkene  
Product (32)**

Level of theory: B3LYP D3BJ RIJCOSX  
def2/TZVP SMD H2O (SAS)

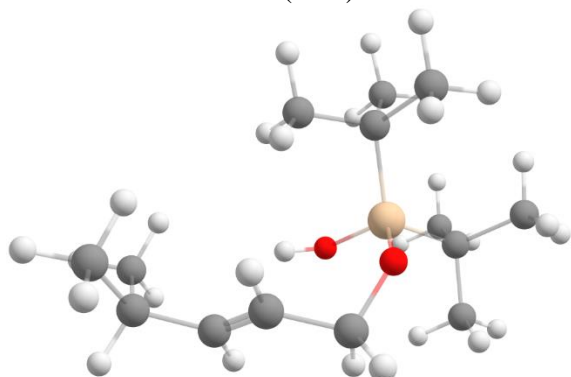

Electronic Energy (Hartree): -991.456758

Gibbs Free Energy (Hartree): -991.086458

Negative Frequencies (cm<sup>-1</sup>): None

Molecular Dipole (Debye): 2.34

Coordinates (Charge 0, Multiplicity 1):

|    |           |          |          |
|----|-----------|----------|----------|
| O  | -7.06922  | 0.74742  | -1.05139 |
| C  | -8.59109  | 4.69287  | -0.10669 |
| C  | -10.02454 | 1.41329  | -1.71399 |
| O  | -9.73261  | 0.19082  | -1.03958 |
| Si | -8.21580  | -0.41504 | -0.75224 |
| C  | -8.21715  | -0.88697 | 1.08682  |
| C  | -7.83948  | -1.77308 | -2.01797 |
| C  | -9.81669  | 2.58101  | -0.80076 |
| C  | -8.92229  | 3.54073  | -1.01390 |
| C  | -6.98180  | -1.71667 | 1.46138  |
| C  | -9.48970  | -1.66196 | 1.45945  |
| C  | -8.68782  | -3.02660 | -1.76383 |
| C  | -8.19639  | -1.20934 | -3.40509 |
| C  | -6.35019  | -2.14840 | -2.01157 |
| C  | -8.19187  | 0.42317  | 1.89402  |
| C  | -9.48908  | 4.79843  | 1.12113  |
| C  | -7.11308  | 4.60552  | 0.30246  |
| H  | -7.25068  | 1.61696  | -0.68049 |
| H  | -8.70909  | 5.61090  | -0.69586 |
| H  | -11.06949 | 1.35148  | -2.02924 |
| H  | -9.41248  | 1.52209  | -2.61414 |
| H  | -10.42651 | 2.58245  | 0.09625  |
| H  | -8.32814  | 3.49259  | -1.92557 |
| H  | -6.94925  | -1.87540 | 2.54492  |
| H  | -6.05193  | -1.21953 | 1.17655  |
| H  | -6.99300  | -2.70224 | 0.99337  |
| H  | -10.38917 | -1.09658 | 1.21273  |
| H  | -9.55233  | -2.62446 | 0.95004  |
| H  | -9.50438  | -1.86294 | 2.53652  |
| H  | -8.53817  | -3.75182 | -2.57117 |

|   |           |          |          |
|---|-----------|----------|----------|
| H | -8.41621  | -3.52405 | -0.83129 |
| H | -9.75504  | -2.79743 | -1.72494 |
| H | -7.97369  | -1.95264 | -4.17827 |
| H | -7.62043  | -0.31148 | -3.63781 |
| H | -9.25708  | -0.96371 | -3.48203 |
| H | -5.71628  | -1.27820 | -2.18728 |
| H | -6.04023  | -2.60120 | -1.06911 |
| H | -6.14532  | -2.87669 | -2.80418 |
| H | -7.27407  | 0.99066  | 1.72418  |
| H | -9.03811  | 1.06905  | 1.65222  |
| H | -8.24289  | 0.20364  | 2.96570  |
| H | -9.21853  | 5.67304  | 1.71491  |
| H | -10.54078 | 4.89495  | 0.84672  |
| H | -9.38633  | 3.92119  | 1.76443  |
| H | -6.81371  | 5.48363  | 0.87760  |
| H | -6.45760  | 4.53873  | -0.56827 |
| H | -6.93837  | 3.72472  | 0.92662  |

**Isopropyl Substrate – Terminal Alkene  
Product (33)**

Level of theory: B3LYP D3BJ RIJCOSX  
def2/TZVP SMD H2O (SAS)

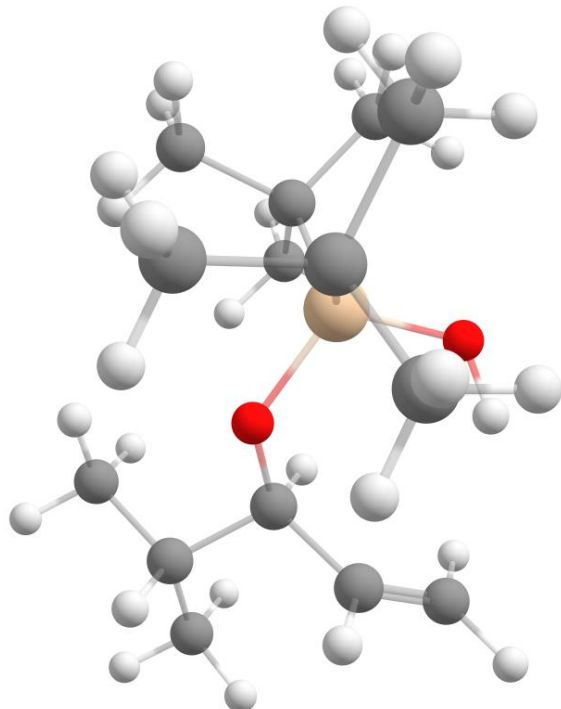

Electronic Energy (Hartree): -991.457734

Gibbs Free Energy (Hartree): -991.087273

Negative Frequencies (cm<sup>-1</sup>): None

Molecular Dipole (Debye): 1.87

Coordinates (Charge 0, Multiplicity 1):

|    |          |          |          |
|----|----------|----------|----------|
| O  | -5.69151 | -0.29578 | 0.45786  |
| C  | -6.79604 | -2.42769 | 0.34661  |
| C  | -4.00479 | -2.43576 | 2.57893  |
| O  | -3.11643 | 0.38334  | 0.99498  |
| Si | -4.53265 | 0.87561  | 0.28669  |
| C  | -5.26323 | 2.36654  | 1.20619  |
| C  | -4.07920 | 1.10299  | -1.53971 |
| C  | -5.12678 | -1.87048 | 2.15285  |
| C  | -5.50043 | -1.68773 | 0.70952  |
| C  | -5.23749 | 2.02461  | 2.70638  |
| C  | -6.72061 | 2.61734  | 0.79087  |
| C  | -3.79326 | -0.29131 | -2.12497 |
| C  | -5.22592 | 1.74306  | -2.33348 |
| C  | -2.81069 | 1.95767  | -1.68758 |
| C  | -4.43806 | 3.63997  | 0.97866  |
| C  | -7.19293 | -2.15847 | -1.10271 |
| C  | -6.66246 | -3.92731 | 0.60512  |
| H  | -7.57914 | -2.02463 | 0.99855  |
| H  | -3.78794 | -2.54543 | 3.63411  |
| H  | -3.26793 | -2.82482 | 1.88481  |

|   |          |          |          |
|---|----------|----------|----------|
| H | -3.20982 | -0.14231 | 1.79669  |
| H | -5.85163 | -1.48933 | 2.86694  |
| H | -4.69025 | -2.07513 | 0.08006  |
| H | -5.68273 | 2.84144  | 3.28430  |
| H | -4.21983 | 1.88143  | 3.07548  |
| H | -5.80846 | 1.12039  | 2.92642  |
| H | -7.14561 | 3.43087  | 1.38938  |
| H | -6.80935 | 2.90684  | -0.25697 |
| H | -7.33860 | 1.73192  | 0.94469  |
| H | -3.47147 | -0.19761 | -3.16791 |
| H | -2.99755 | -0.80447 | -1.58153 |
| H | -4.67981 | -0.92598 | -2.11495 |
| H | -4.97883 | 1.76336  | -3.40058 |
| H | -5.41213 | 2.77373  | -2.02760 |
| H | -6.15970 | 1.18657  | -2.22624 |
| H | -2.95440 | 2.98040  | -1.33785 |
| H | -1.97312 | 1.53078  | -1.13428 |
| H | -2.52057 | 2.01320  | -2.74274 |
| H | -4.49848 | 3.98842  | -0.05358 |
| H | -4.81362 | 4.44984  | 1.61377  |
| H | -3.38367 | 3.49512  | 1.22415  |
| H | -8.14723 | -2.63626 | -1.33302 |
| H | -7.29248 | -1.09168 | -1.29644 |
| H | -6.44843 | -2.56456 | -1.79315 |
| H | -7.58521 | -4.44477 | 0.33737  |
| H | -6.44628 | -4.14718 | 1.65077  |
| H | -5.85710 | -4.35708 | 0.00274  |

**Isopropyl Substrate – Protonated SM  
(towards terminal alkene product) (59)**

Level of theory: B3LYP D3BJ RIJCOSX  
def2/TZVP SMD H2O (SAS)

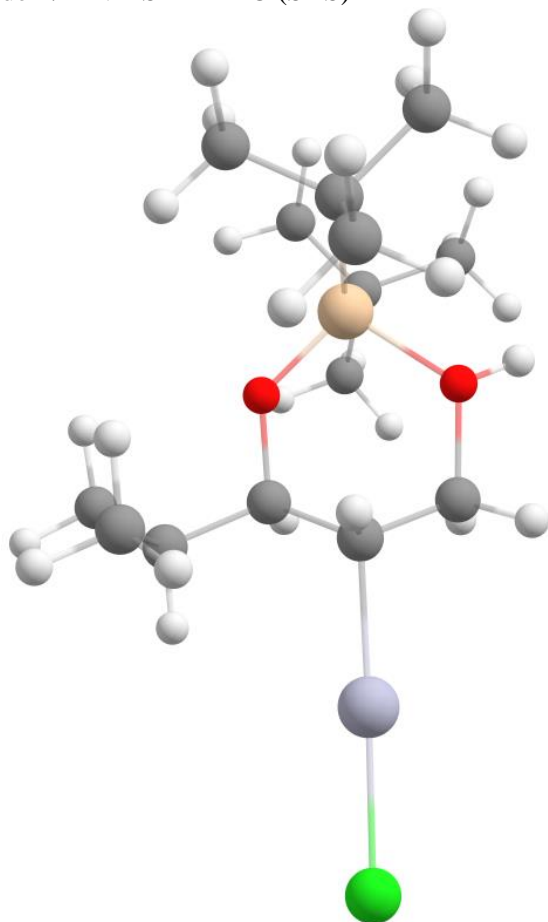

Electronic Energy (Hartree): -1604.931457

Gibbs Free Energy (Hartree): -1604.559848

Negative Frequencies (cm<sup>-1</sup>): None

Molecular Dipole (Debye): 12.46

Coordinates (Charge +1, Multiplicity 1):

|    |          |          |          |
|----|----------|----------|----------|
| Hg | 0.01496  | -1.41474 | -2.58982 |
| Cl | -0.55616 | -1.98933 | -4.74852 |
| Si | 0.88087  | 0.29838  | 2.30006  |
| O  | 1.93248  | 0.51543  | 0.82498  |
| O  | -0.31956 | -0.56253 | 1.64135  |
| C  | -0.72804 | -0.70517 | 0.26667  |
| C  | 0.52111  | -0.94914 | -0.57611 |
| C  | 1.45159  | 0.22322  | -0.59799 |
| C  | 0.42135  | 2.06374  | 2.74211  |
| C  | 1.87369  | -0.78920 | 3.45316  |
| C  | -1.79503 | -1.80223 | 0.20947  |
| C  | -1.25659 | -3.17688 | 0.59902  |
| C  | -2.99585 | -1.41316 | 1.06888  |
| H  | 1.05052  | -1.83177 | -0.21803 |

|   |          |          |          |
|---|----------|----------|----------|
| H | 2.37171  | 0.03859  | -1.14263 |
| H | 0.98315  | 1.14610  | -0.93168 |
| H | -2.13560 | -1.84093 | -0.83250 |
| H | -2.05197 | -3.92008 | 0.54352  |
| H | -0.45329 | -3.52047 | -0.05516 |
| H | -0.88140 | -3.17145 | 1.62314  |
| H | -3.38487 | -0.43110 | 0.79214  |
| H | -2.72687 | -1.38626 | 2.12511  |
| H | -3.80218 | -2.13640 | 0.94618  |
| H | -1.19040 | 0.23714  | -0.04408 |
| H | 2.55226  | 1.26128  | 0.83522  |
| C | -0.61103 | 2.56772  | 1.71828  |
| C | 1.65024  | 2.98899  | 2.71919  |
| C | -0.20956 | 2.08729  | 4.14596  |
| C | 2.39887  | -1.99669 | 2.65632  |
| C | 0.92716  | -1.29887 | 4.55833  |
| C | 3.05443  | -0.03581 | 4.08306  |
| H | -0.21765 | 2.58532  | 0.69893  |
| H | -0.89529 | 3.59458  | 1.96122  |
| H | -1.52018 | 1.96584  | 1.72401  |
| H | -1.06526 | 1.41404  | 4.22688  |
| H | -0.56996 | 3.09573  | 4.36481  |
| H | 0.50676  | 1.82427  | 4.92462  |
| H | 2.07076  | 3.10762  | 1.71521  |
| H | 2.44563  | 2.66141  | 3.38852  |
| H | 1.35700  | 3.99304  | 3.03560  |
| H | 0.07299  | -1.83910 | 4.14712  |
| H | 0.54856  | -0.49531 | 5.19014  |
| H | 1.47224  | -1.99093 | 5.20553  |
| H | 3.74609  | 0.35955  | 3.33533  |
| H | 3.62790  | -0.72024 | 4.71339  |
| H | 2.73009  | 0.78883  | 4.71836  |
| H | 3.10425  | -1.70636 | 1.87641  |
| H | 1.59003  | -2.56685 | 2.19737  |
| H | 2.92710  | -2.67184 | 3.33409  |

**Isopropyl Substrate – Mercuronium  
Rearrangement Transition State (towards  
terminal alkene product) (60)**

Level of theory: B3LYP D3BJ RIJCOSX  
def2/TZVP SMD H2O (SAS)

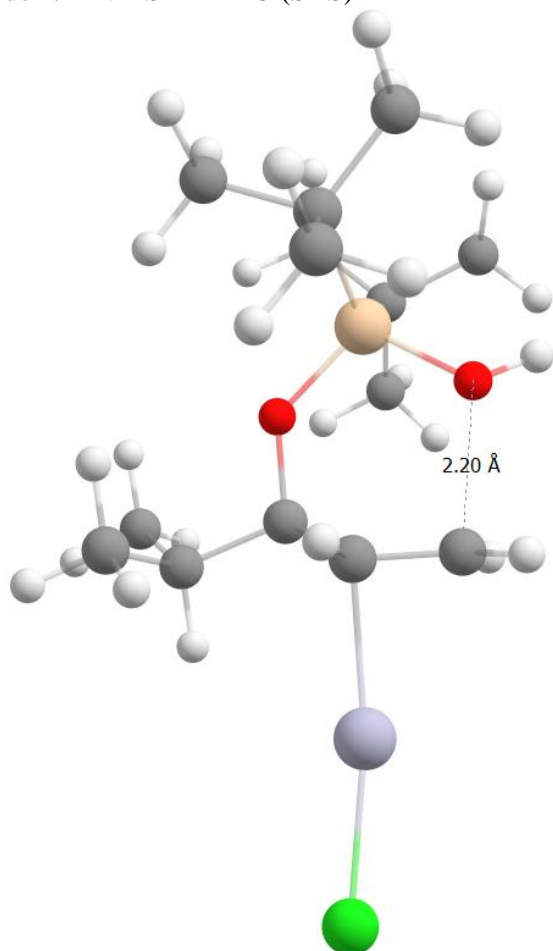

Electronic Energy (Hartree): -1604.918103  
Gibbs Free Energy (Hartree): -1604.550816  
Negative Frequencies (cm<sup>-1</sup>): -181.51  
Molecular Dipole (Debye): 5.64

Coordinates (Charge +1, Multiplicity 1):

|    |          |          |          |
|----|----------|----------|----------|
| Hg | 0.04839  | -1.42500 | -2.96579 |
| Cl | -0.63072 | -2.03164 | -5.06076 |
| Si | 0.80430  | 0.29977  | 2.07075  |
| O  | 1.92849  | 0.63402  | 0.83999  |
| O  | -0.33996 | -0.62466 | 1.30955  |
| C  | -0.74975 | -0.69859 | -0.03982 |
| C  | 0.50731  | -1.07416 | -0.81998 |
| C  | 1.38687  | -0.05593 | -1.17905 |
| C  | 0.08650  | 1.95125  | 2.63438  |
| C  | 1.61111  | -0.85656 | 3.31552  |
| C  | -1.91069 | -1.68966 | -0.16270 |
| C  | -1.52808 | -3.10395 | 0.26718  |

|   |          |          |          |
|---|----------|----------|----------|
| C | -3.11610 | -1.17505 | 0.61988  |
| H | 0.96347  | -2.01671 | -0.52972 |
| H | 2.41438  | -0.26612 | -1.44338 |
| H | 1.02557  | 0.94559  | -1.36609 |
| H | -2.18785 | -1.70673 | -1.22690 |
| H | -2.38636 | -3.76890 | 0.17360  |
| H | -0.72808 | -3.53322 | -0.33960 |
| H | -1.20651 | -3.11797 | 1.30873  |
| H | -3.41067 | -0.17621 | 0.29228  |
| H | -2.89378 | -1.13338 | 1.68645  |
| H | -3.97170 | -1.83567 | 0.48022  |
| H | -1.09223 | 0.28345  | -0.38469 |
| H | 2.44765  | 1.44253  | 0.90516  |
| C | -0.85293 | 2.46921  | 1.53099  |
| C | 1.20700  | 2.98140  | 2.85786  |
| C | -0.71860 | 1.78928  | 3.93293  |
| C | 2.29070  | -1.98859 | 2.52321  |
| C | 0.55769  | -1.47718 | 4.24818  |
| C | 2.67013  | -0.11603 | 4.14592  |
| H | -0.34366 | 2.58790  | 0.57109  |
| H | -1.24090 | 3.45406  | 1.80582  |
| H | -1.71169 | 1.81174  | 1.38759  |
| H | -1.49736 | 1.02924  | 3.84419  |
| H | -1.21287 | 2.73327  | 4.18039  |
| H | -0.08343 | 1.52662  | 4.77931  |
| H | 1.74110  | 3.22391  | 1.93469  |
| H | 1.93966  | 2.65636  | 3.59754  |
| H | 0.77913  | 3.92118  | 3.21806  |
| H | -0.22495 | -1.99363 | 3.69018  |
| H | 0.08007  | -0.73802 | 4.89062  |
| H | 1.03566  | -2.21361 | 4.90103  |
| H | 3.43557  | 0.35028  | 3.52108  |
| H | 3.18275  | -0.82069 | 4.80709  |
| H | 2.23170  | 0.65645  | 4.77942  |
| H | 3.05289  | -1.61489 | 1.83790  |
| H | 1.56661  | -2.57161 | 1.95040  |
| H | 2.78164  | -2.67780 | 3.21595  |

**Isopropyl Substrate – Protonated SM  
(towards internal alkene product)**

Level of theory: B3LYP D3BJ RIJCOSX  
def2/TZVP SMD H2O (SAS)

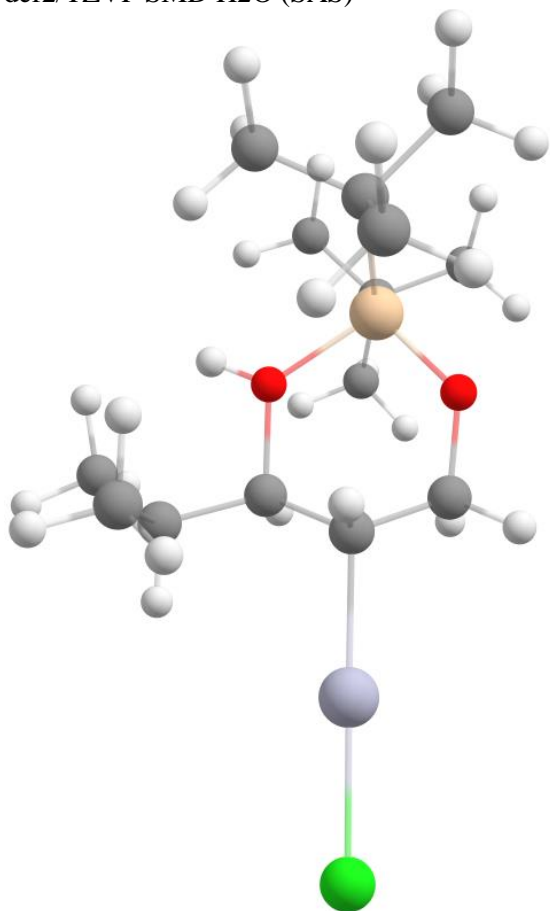

Electronic Energy (Hartree): -1604.931954

Gibbs Free Energy (Hartree): -1604.560381

Negative Frequencies (cm<sup>-1</sup>): None

Molecular Dipole (Debye): 11.63

Coordinates (Charge +1, Multiplicity 1):

|    |          |          |          |
|----|----------|----------|----------|
| Hg | -0.08159 | -1.43216 | -2.57997 |
| Cl | -0.58994 | -1.95251 | -4.76842 |
| Si | 1.09563  | 0.38871  | 2.21053  |
| O  | 1.87546  | 0.43268  | 0.79053  |
| O  | -0.37900 | -0.52038 | 1.69210  |
| C  | -0.82727 | -0.73471 | 0.22956  |
| C  | 0.42760  | -0.98204 | -0.56438 |
| C  | 1.39534  | 0.19117  | -0.53452 |
| C  | 0.47565  | 2.07717  | 2.73852  |
| C  | 1.90581  | -0.78991 | 3.42231  |
| C  | -1.88914 | -1.82893 | 0.27925  |
| C  | -1.32946 | -3.21203 | 0.60274  |
| C  | -3.02747 | -1.44580 | 1.22891  |
| H  | 0.93328  | -1.87648 | -0.20114 |

|   |          |          |          |
|---|----------|----------|----------|
| H | 2.27297  | -0.01507 | -1.14406 |
| H | 0.92753  | 1.10291  | -0.91407 |
| H | -2.31199 | -1.84619 | -0.73039 |
| H | -2.13772 | -3.94196 | 0.62563  |
| H | -0.60667 | -3.55549 | -0.13682 |
| H | -0.84565 | -3.23129 | 1.58114  |
| H | -3.39281 | -0.43290 | 1.05050  |
| H | -2.74553 | -1.53961 | 2.28527  |
| H | -3.86877 | -2.12474 | 1.09972  |
| H | -1.27828 | 0.22057  | -0.03661 |
| H | -1.14353 | -0.57796 | 2.28734  |
| C | 2.46343  | -1.98562 | 2.63091  |
| C | 0.88573  | -1.30601 | 4.45283  |
| C | 3.05839  | -0.07684 | 4.15106  |
| C | -0.45903 | 2.62321  | 1.64395  |
| C | 1.69228  | 3.01546  | 2.86091  |
| C | -0.27952 | 2.03014  | 4.07457  |
| H | 3.21197  | -1.68147 | 1.89979  |
| H | 1.67821  | -2.53406 | 2.10596  |
| H | 2.93603  | -2.68829 | 3.32180  |
| H | 3.79318  | 0.33809  | 3.45840  |
| H | 3.58253  | -0.79351 | 4.78867  |
| H | 2.70356  | 0.72805  | 4.79571  |
| H | 0.07958  | -1.87931 | 3.98812  |
| H | 0.44128  | -0.51039 | 5.05011  |
| H | 1.38644  | -1.98584 | 5.14675  |
| H | 0.02543  | 2.66762  | 0.66713  |
| H | -0.75810 | 3.64324  | 1.89723  |
| H | -1.37932 | 2.04267  | 1.54955  |
| H | -1.13555 | 1.34960  | 4.05537  |
| H | -0.67448 | 3.02256  | 4.30664  |
| H | 0.36465  | 1.73781  | 4.90362  |
| H | 2.25338  | 3.08011  | 1.92741  |
| H | 2.38021  | 2.70613  | 3.64788  |
| H | 1.34778  | 4.02294  | 3.10859  |



**Isopropyl Substrate – Mercuronium  
Rearrangement Transition State (towards  
internal alkene product)**

Level of theory: B3LYP D3BJ RIJCOSX  
def2/TZVP SMD H2O (SAS)

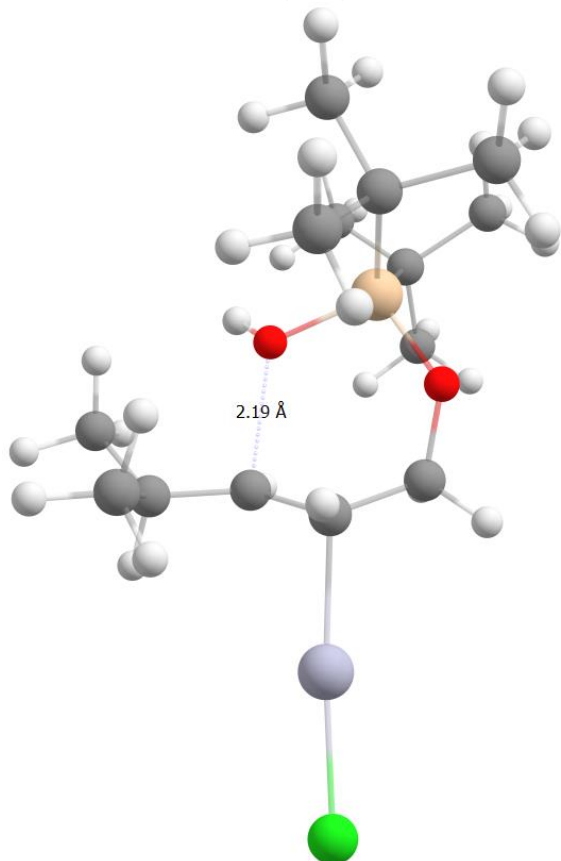

Electronic Energy (Hartree): -1604.923855  
Gibbs Free Energy (Hartree): -1604.554830  
Negative Frequencies (cm<sup>-1</sup>): -77.07  
Molecular Dipole (Debye): 6.93

Coordinates (Charge +1, Multiplicity 1):

|    |          |          |          |
|----|----------|----------|----------|
| Hg | -0.22550 | -1.25925 | -2.98588 |
| Cl | -0.47768 | -1.59836 | -5.23539 |
| Si | 0.86083  | 0.45254  | 2.01596  |
| O  | 1.62401  | 0.36203  | 0.55379  |
| O  | -0.62901 | -0.31074 | 1.69664  |
| C  | -1.12626 | -0.89803 | -0.35575 |
| C  | 0.20031  | -0.94494 | -0.86727 |
| C  | 1.05777  | 0.31366  | -0.73556 |
| C  | 0.46356  | 2.23276  | 2.50107  |
| C  | 1.85894  | -0.63532 | 3.18155  |
| C  | -1.99624 | -2.07629 | -0.09843 |
| C  | -1.25015 | -3.38851 | 0.11575  |
| C  | -3.05044 | -1.81674 | 0.98602  |
| H  | 0.74765  | -1.84950 | -0.61067 |
| H  | 1.88804  | 0.29305  | -1.44001 |

|   |          |          |          |
|---|----------|----------|----------|
| H | 0.45986  | 1.20459  | -0.94752 |
| H | -2.56683 | -2.14457 | -1.04057 |
| H | -1.96465 | -4.19275 | 0.28357  |
| H | -0.64261 | -3.67471 | -0.74372 |
| H | -0.60134 | -3.32752 | 0.98990  |
| H | -3.51345 | -0.83464 | 0.87994  |
| H | -2.60974 | -1.90257 | 1.97801  |
| H | -3.84029 | -2.56174 | 0.91010  |
| H | -1.63668 | 0.05730  | -0.41911 |
| H | -1.39843 | 0.00885  | 2.17994  |
| C | 1.72277  | -2.09052 | 2.69856  |
| C | 1.33772  | -0.53940 | 4.62326  |
| C | 3.34425  | -0.23732 | 3.13830  |
| C | -0.03226 | 2.97867  | 1.24949  |
| C | 1.71683  | 2.94427  | 3.03476  |
| C | -0.64072 | 2.27527  | 3.57095  |
| H | -1.59084 | 1.86877  | 3.21055  |
| H | -0.84304 | 3.31280  | 3.85144  |
| H | -0.37013 | 1.74066  | 4.48151  |
| H | 0.74261  | 3.05130  | 0.48516  |
| H | -0.32014 | 3.99934  | 1.51653  |
| H | -0.91398 | 2.50954  | 0.80493  |
| H | 2.54432  | 2.90747  | 2.32358  |
| H | 2.06145  | 2.51952  | 3.97801  |
| H | 1.49231  | 3.99911  | 3.21817  |
| H | 2.06912  | -2.21466 | 1.67058  |
| H | 0.69360  | -2.44581 | 2.76466  |
| H | 2.33480  | -2.74445 | 3.32594  |
| H | 3.75076  | -0.29948 | 2.12811  |
| H | 3.92288  | -0.91672 | 3.77125  |
| H | 3.51585  | 0.77370  | 3.50828  |
| H | 0.27781  | -0.79322 | 4.70018  |
| H | 1.48072  | 0.45420  | 5.04945  |
| H | 1.88171  | -1.24315 | 5.25986  |

# VIII. NMR Spectra

Compound 5 ( $^1\text{H}$  NMR: 400 MHz,  $^{13}\text{C}$  NMR: 100 MHz)

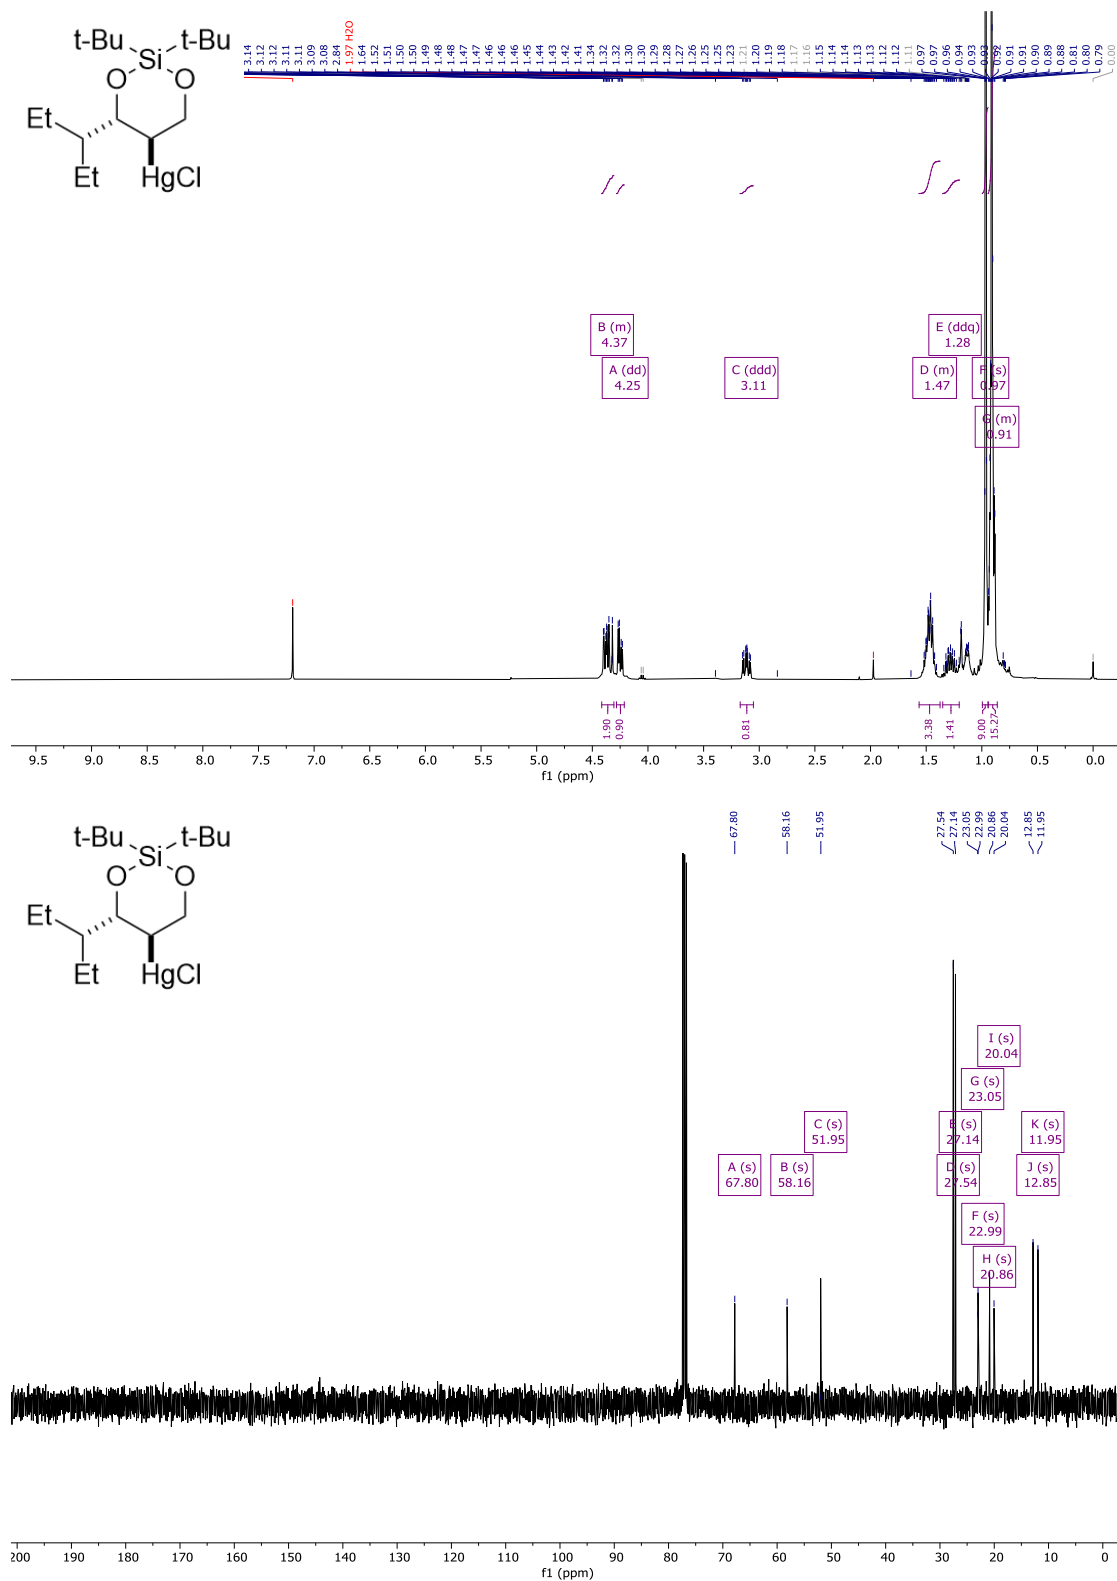



# Compound 6 (<sup>1</sup>H NMR: 400 MHz, <sup>13</sup>C NMR: 100 MHz)

RD-I-6.1.1.1r  
Pure

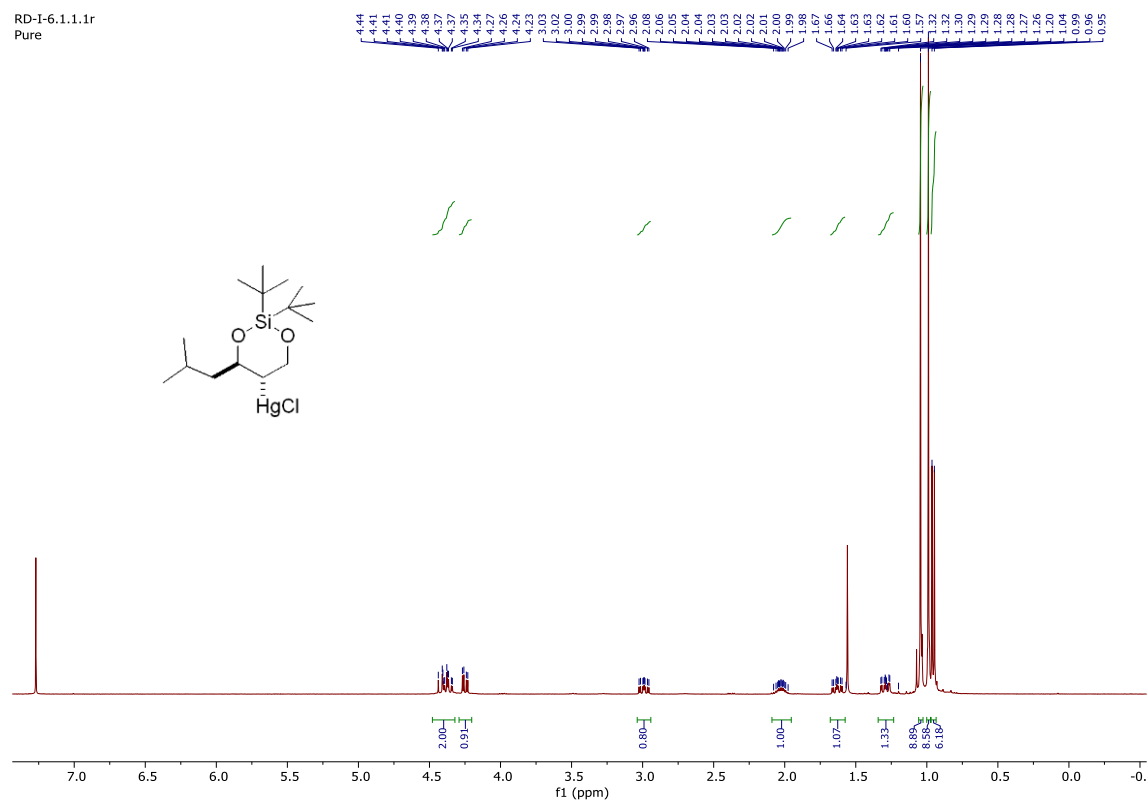

RD-I-6.2.1.1r  
74.35

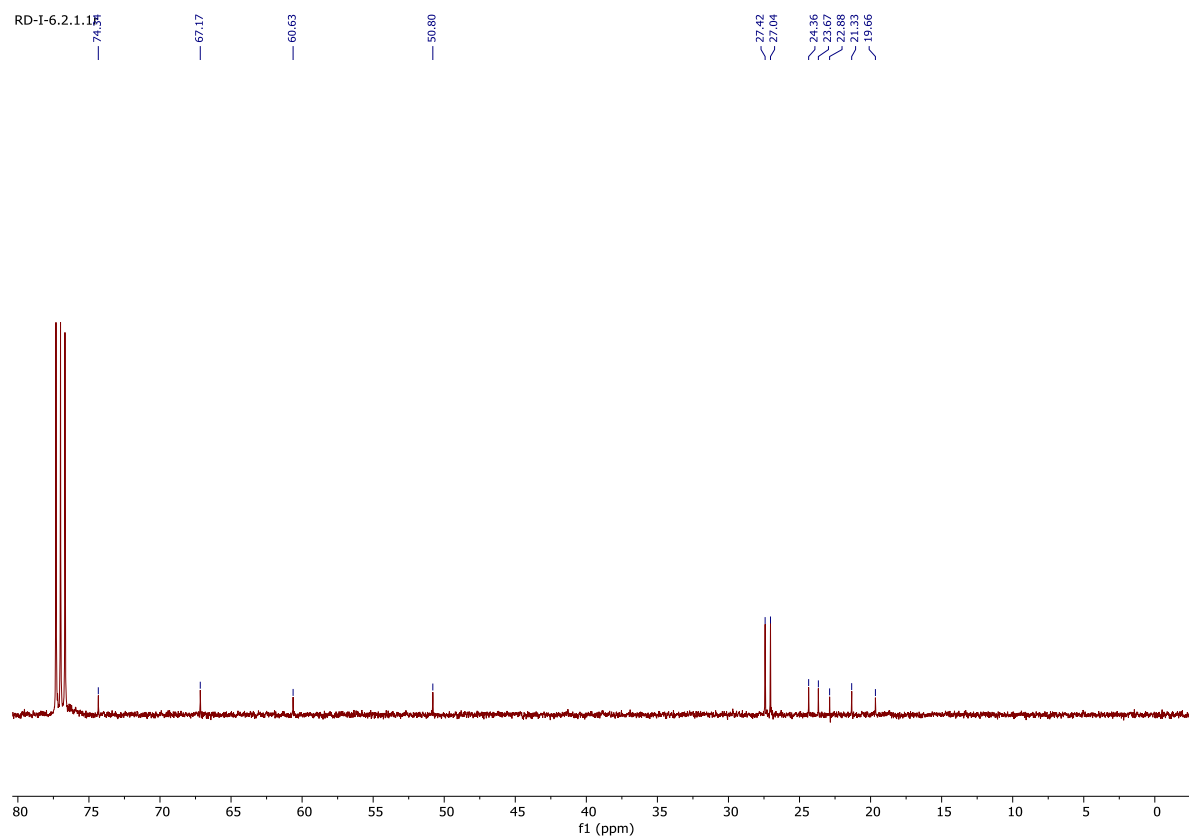

The figure displays the chemical structure of compound 10 and its corresponding <sup>1</sup>H and <sup>13</sup>C NMR spectra.

**Chemical Structure:** The structure shows a central carbon atom bonded to a methyl group (Me), a dimethylsiloxane group (t-Bu-Si(t-Bu)-O-), and a mercury atom (Hg) bonded to a chlorine atom (Cl). The silicon atom is also bonded to two tert-butyl groups (t-Bu).

**<sup>1</sup>H NMR Spectrum (400 MHz, CDCl<sub>3</sub>):** The spectrum shows several peaks in the aliphatic region (0.5-4.5 ppm). The peaks are labeled with their chemical shifts (ppm) and integrations:

- 4.32, 4.29, 4.26, 4.23, 4.22, 4.12, 4.11, 4.10, 4.02, 4.01, 4.00, 3.99, 3.97, 3.97, 3.70, 3.68, 3.67, 3.66, 3.65, 2.88, 2.87, 2.61, 2.60, 2.59, 2.58, 2.58, 2.55, 2.29, 1.49 (H<sub>2</sub>O), 1.43, 1.30, 1.30, 1.14, 0.97, 0.96, 0.91, 0.89, 0.76, 0.00 (TMS).
- Integration values: 2.03, 1.07, 1.92, 1.04, 0.88, 3.01, 3.12, 18.00.

**<sup>13</sup>C NMR Spectrum (100 MHz, CDCl<sub>3</sub>):** The spectrum shows several peaks in the aliphatic region (19-79 ppm). The peaks are labeled with their chemical shifts (ppm):

- 110.93, 78.92, 78.23, 68.02, 67.47, 53.00, 27.40, 27.13, 27.01, 26.88, 22.88, 19.72.

**Compound 9 ( $^1\text{H}$  NMR: 400 MHz,  $^{13}\text{C}$  NMR: 100 MHz)**

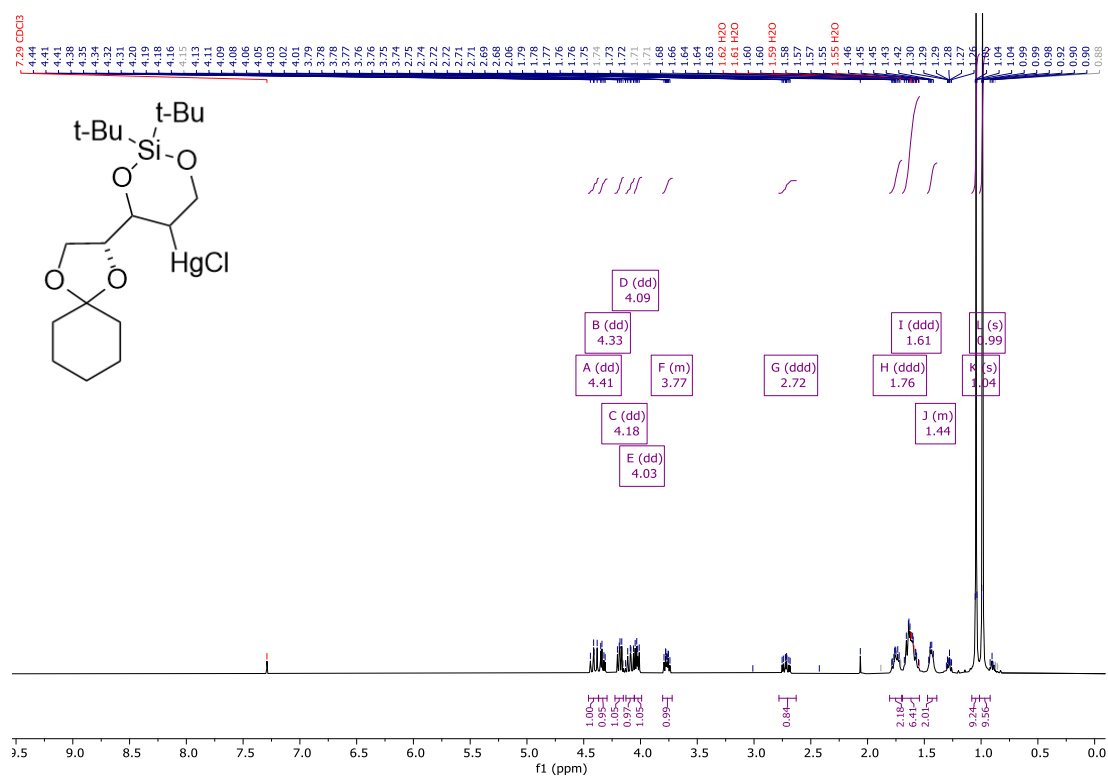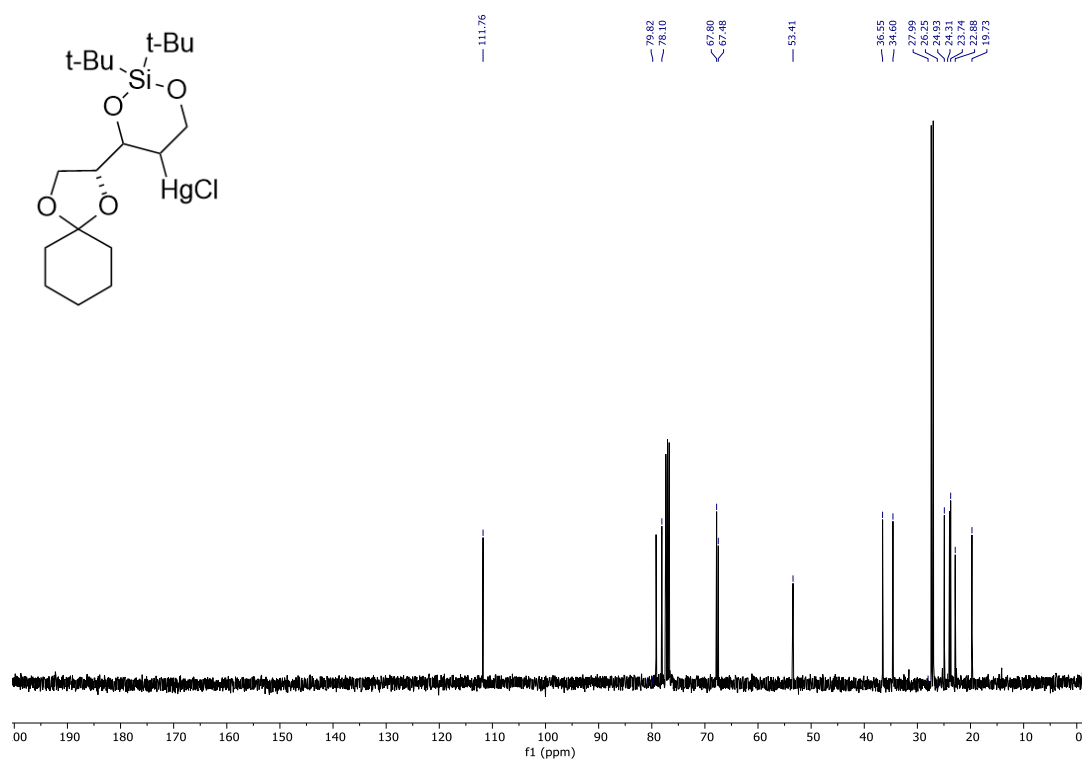

**Compound 10 ( $^1\text{H}$  NMR: 400 MHz,  $^{13}\text{C}$  NMR: 100 MHz)**

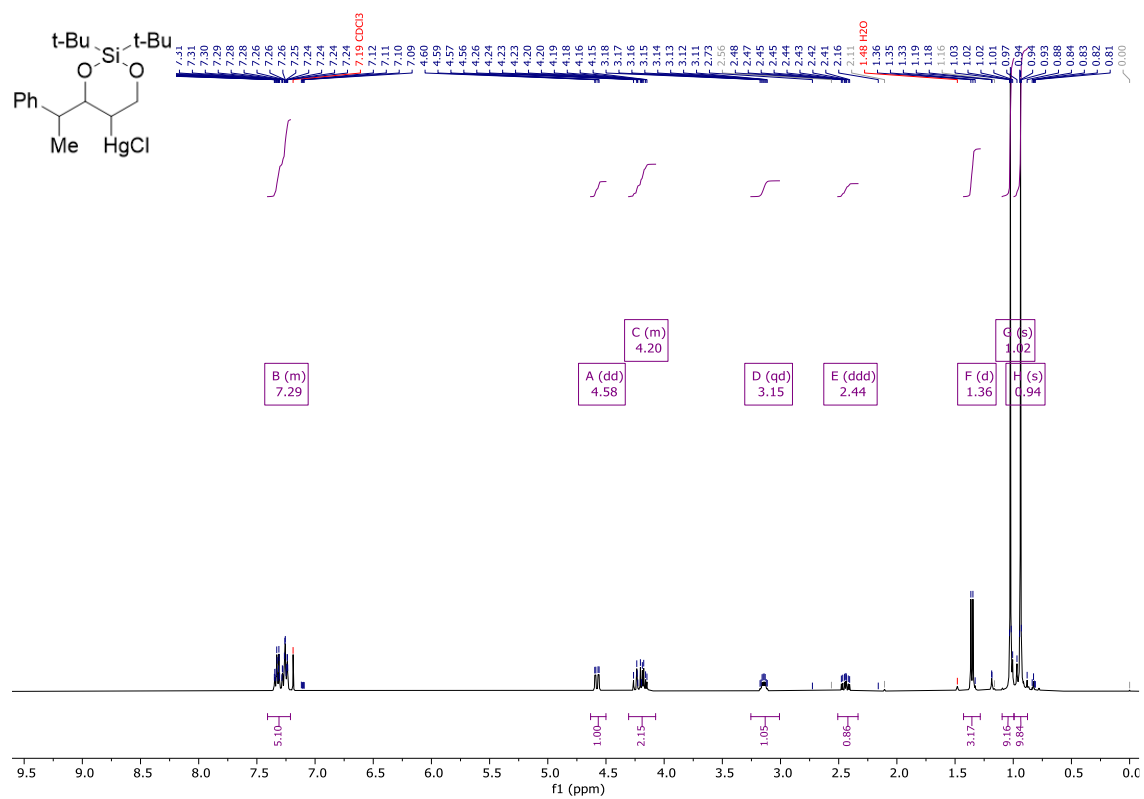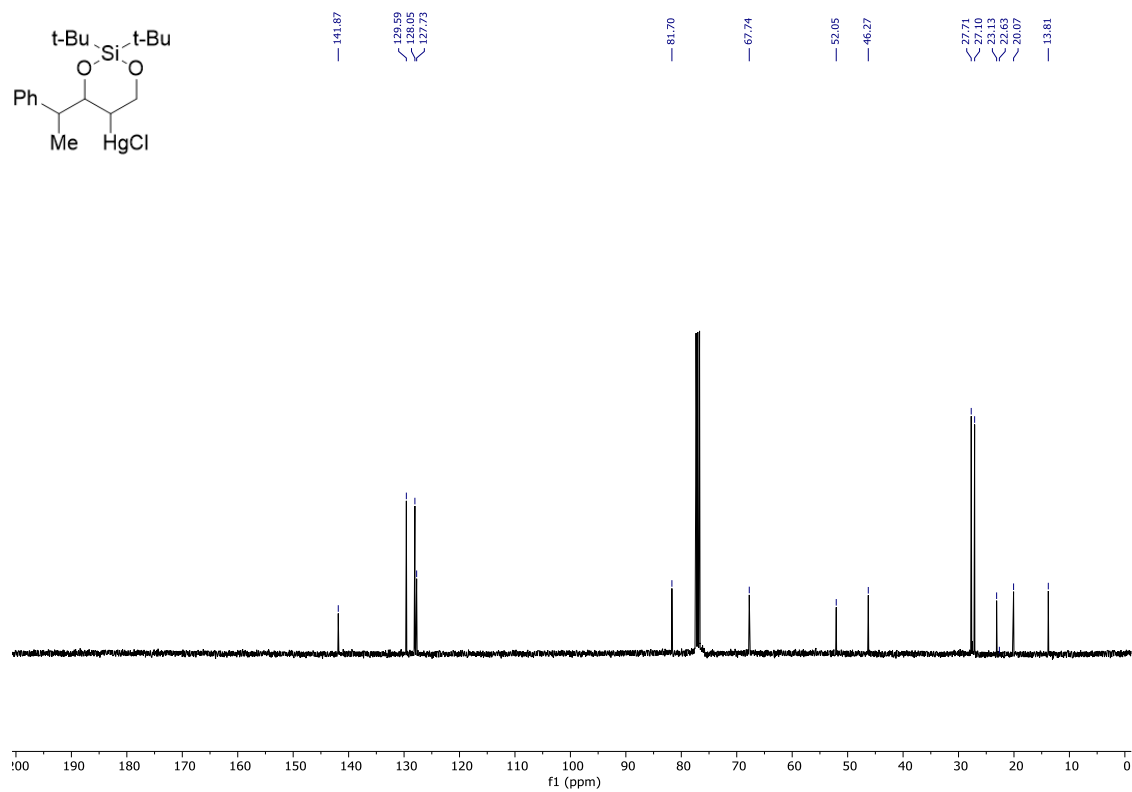

**Compound 11 ( $^1\text{H}$  NMR: 400 MHz,  $^{13}\text{C}$  NMR: 100 MHz)**

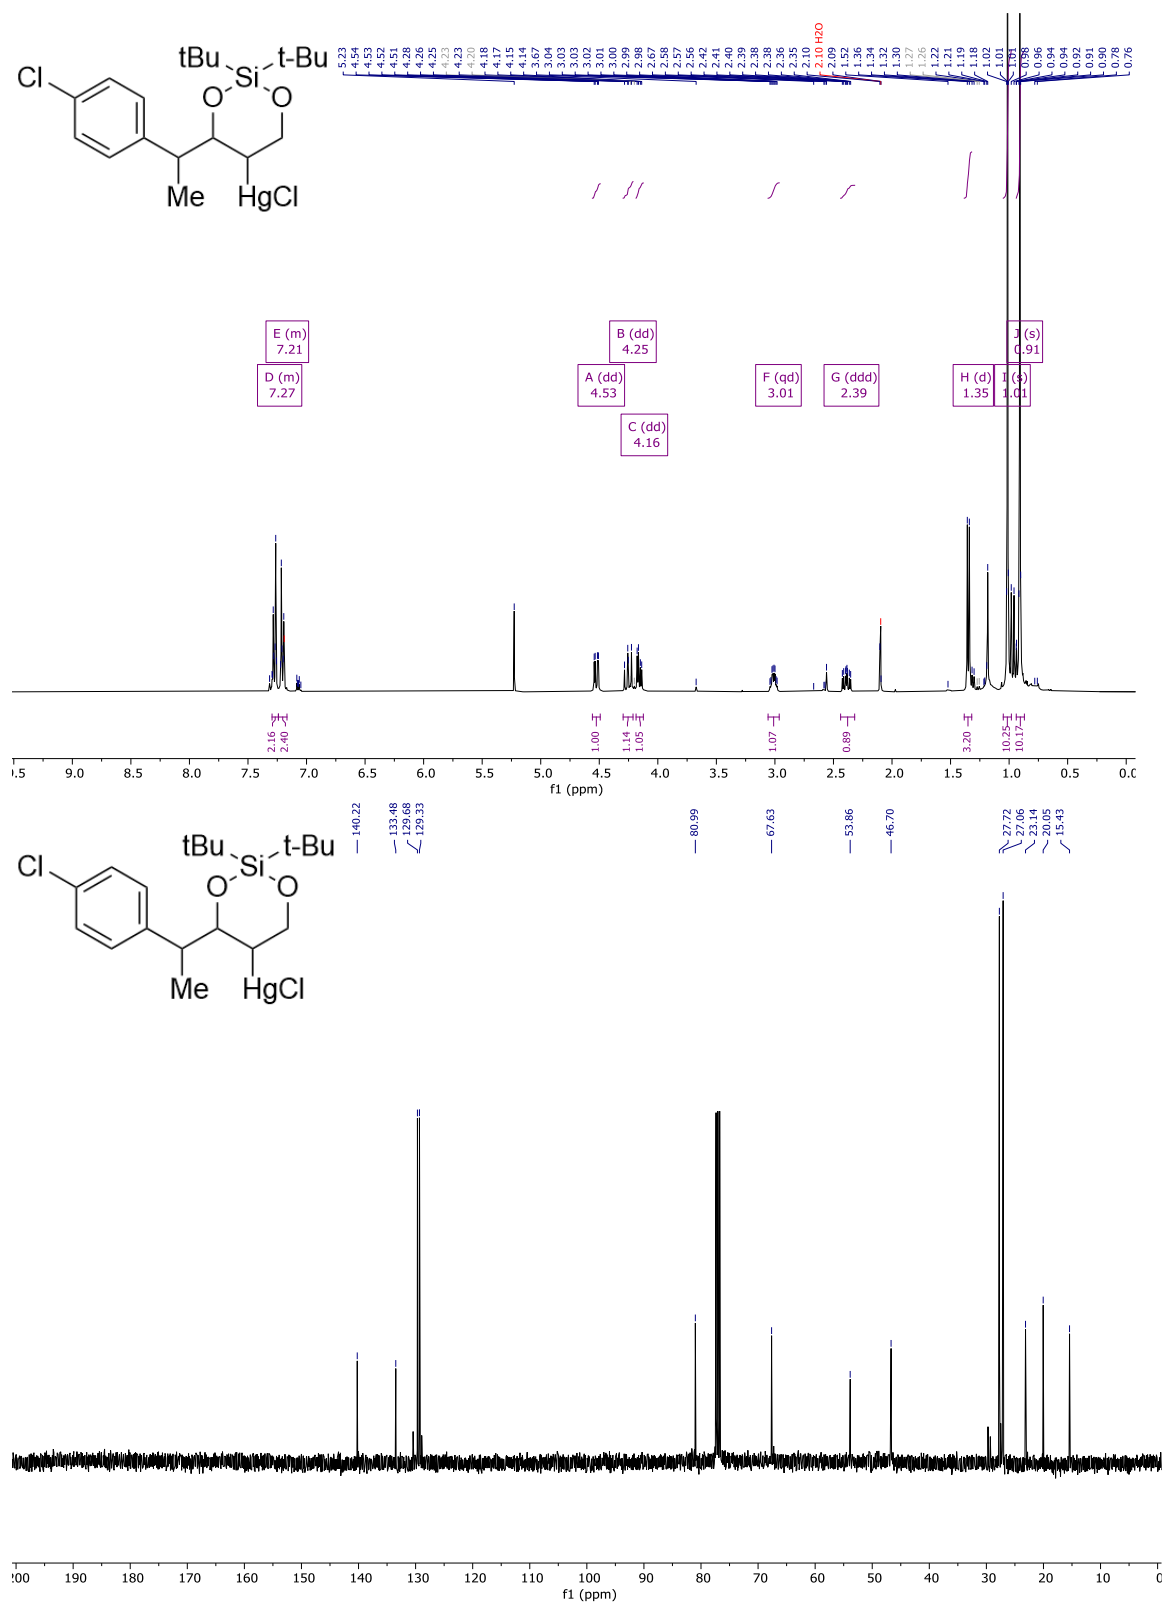

# Compound 12 (<sup>1</sup>H NMR: 400 MHz, <sup>13</sup>C NMR: 100 MHz)

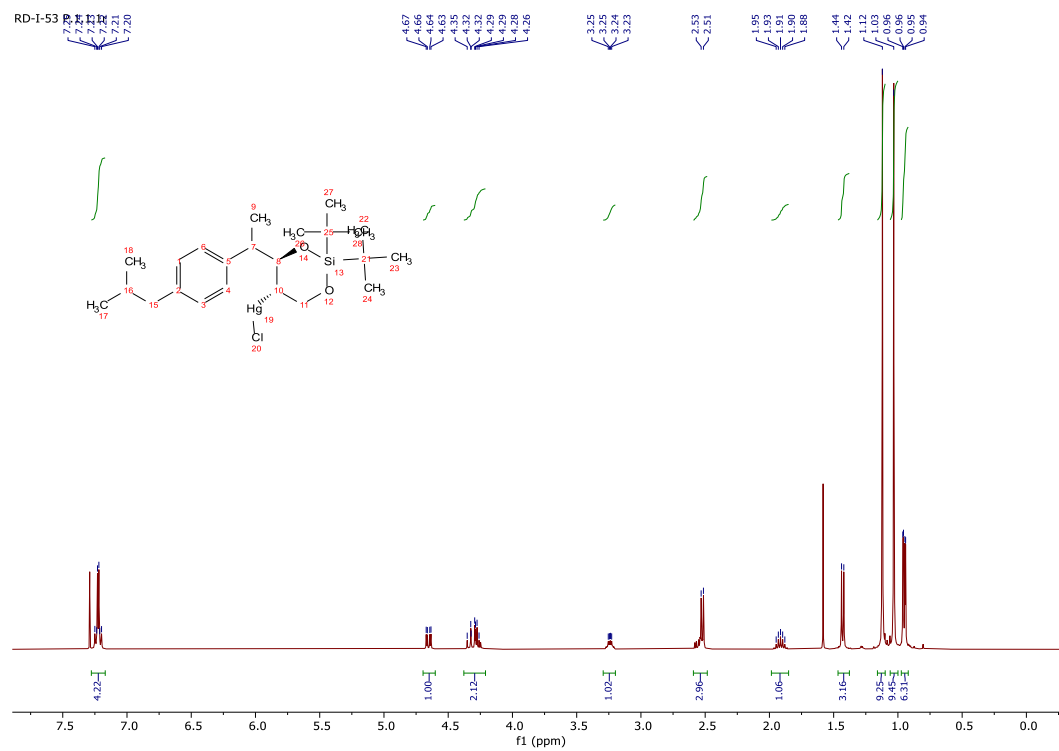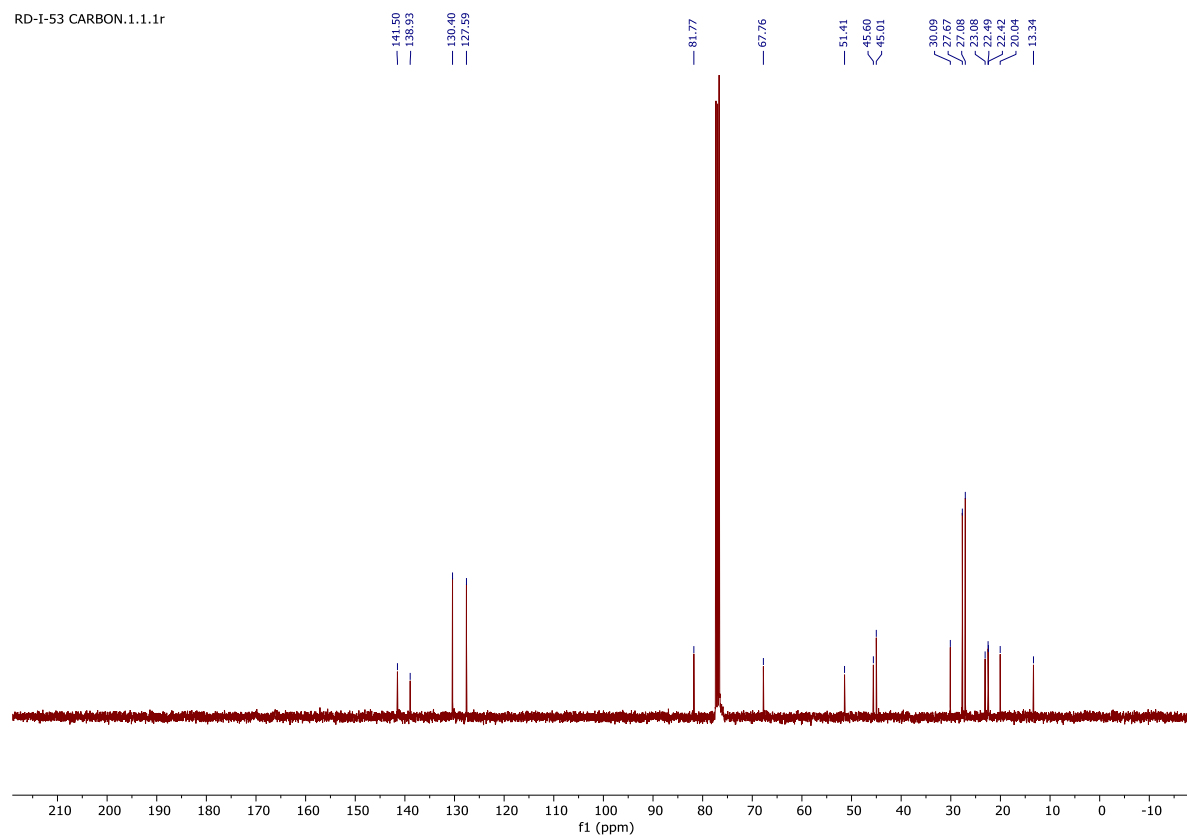

# Compound 13 (<sup>1</sup>H NMR: 400 MHz, <sup>13</sup>C NMR: 100 MHz)

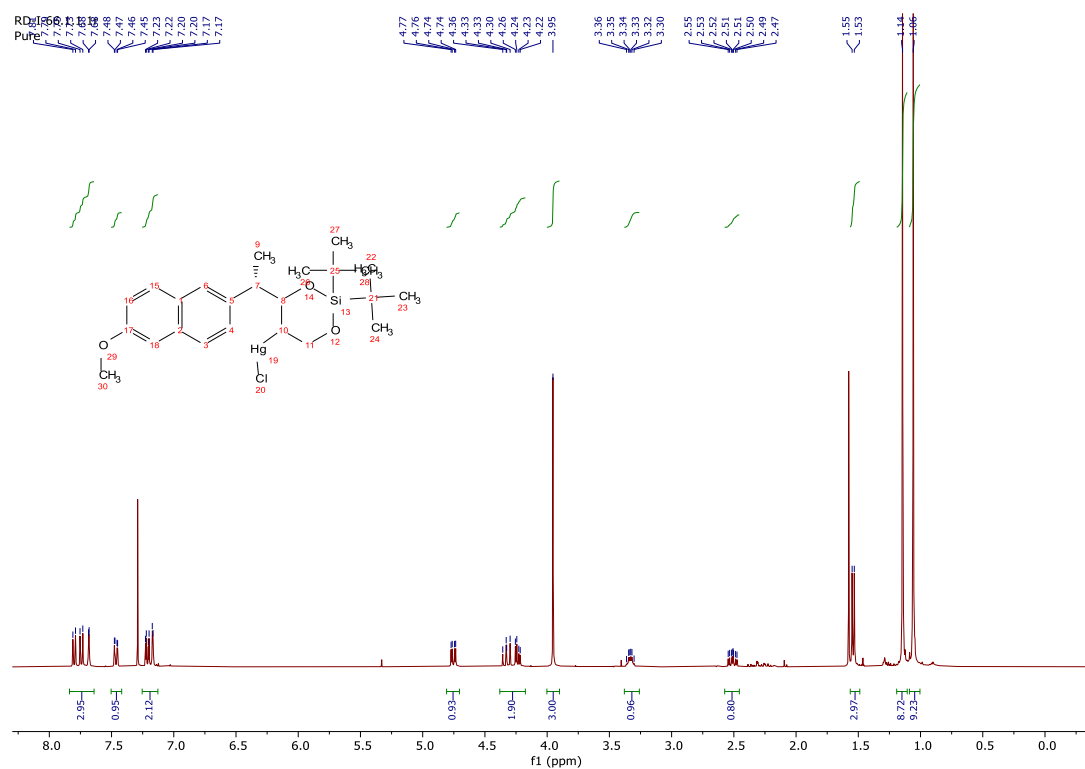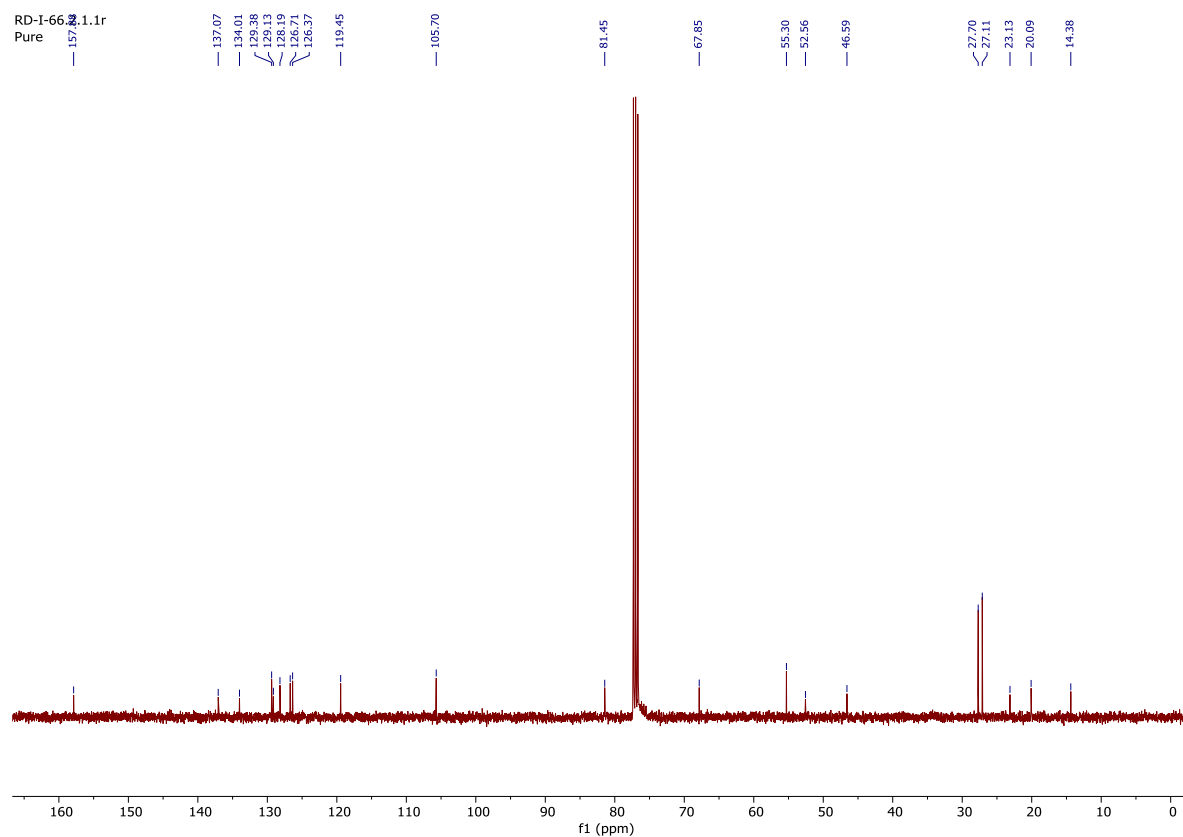

Compound 14 ( $^1\text{H}$  NMR: 400 MHz,  $^{13}\text{C}$  NMR: 100 MHz)

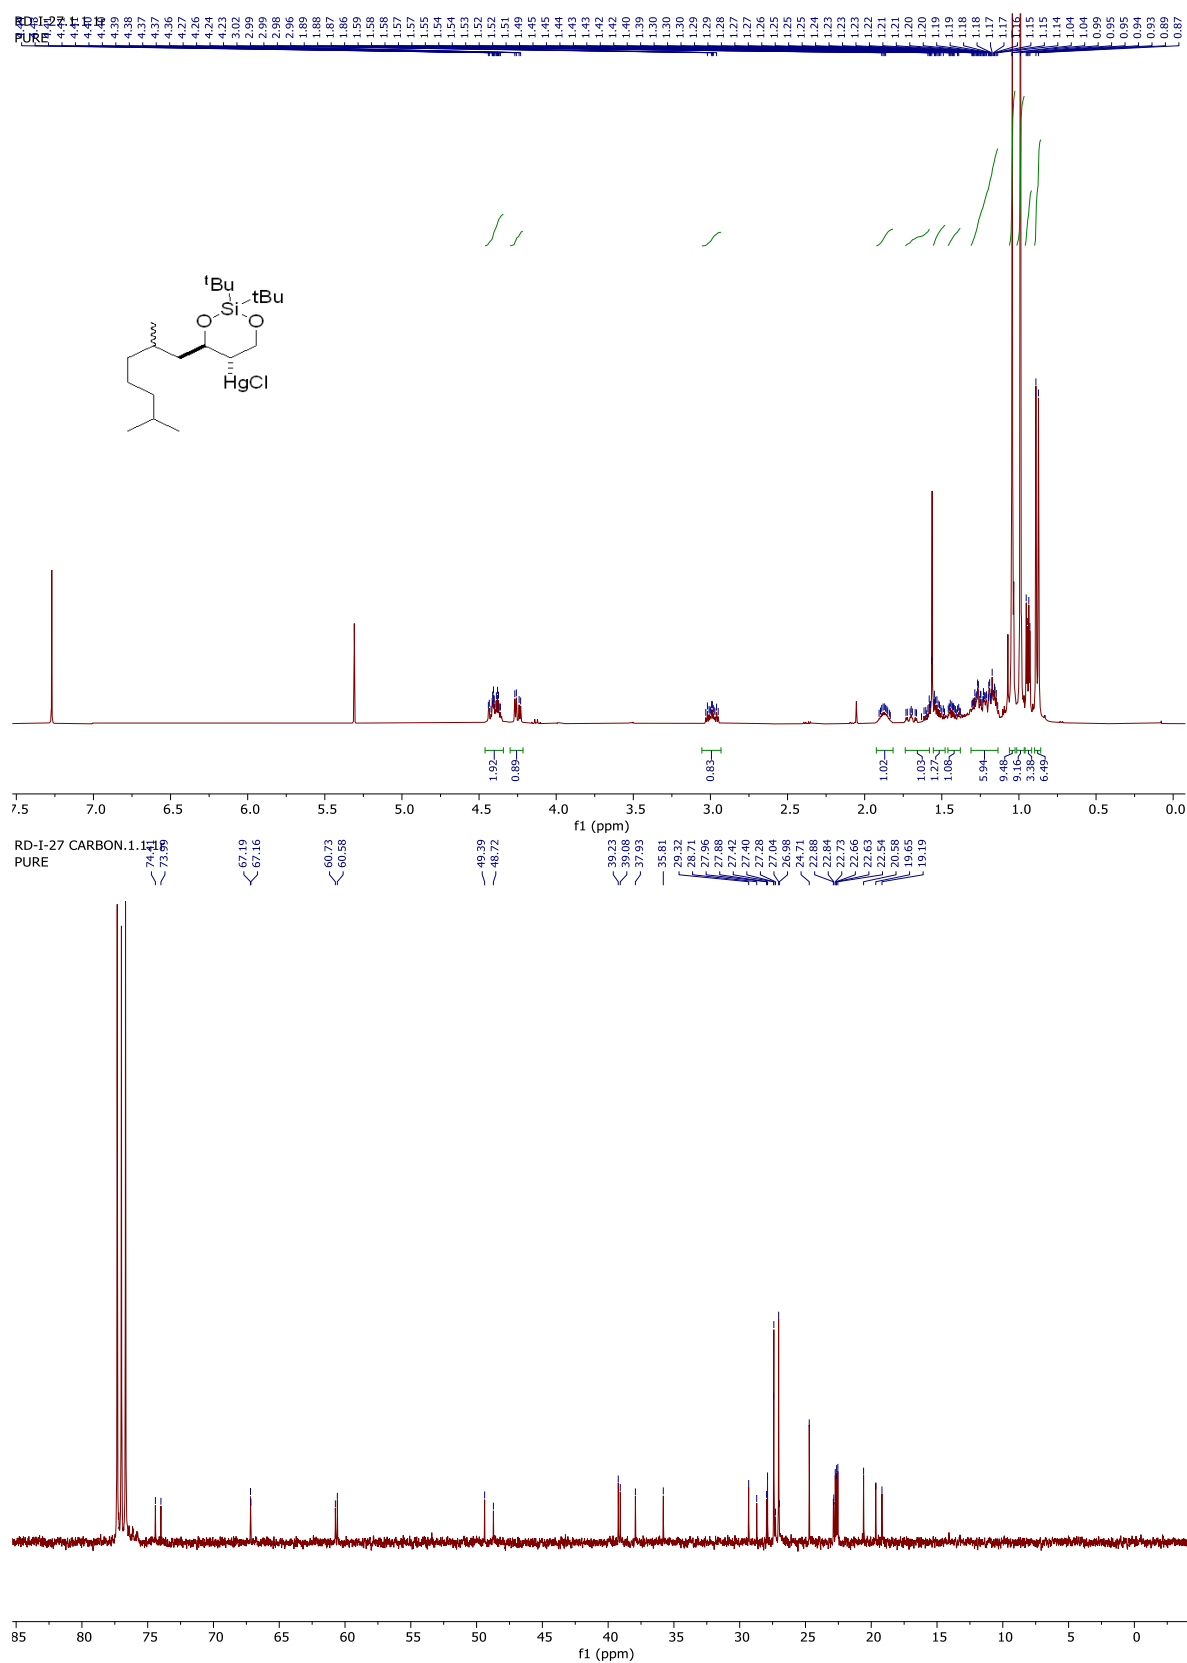



**Compound 15 (<sup>1</sup>H NMR: 400 MHz, <sup>13</sup>C NMR: 100 MHz)**

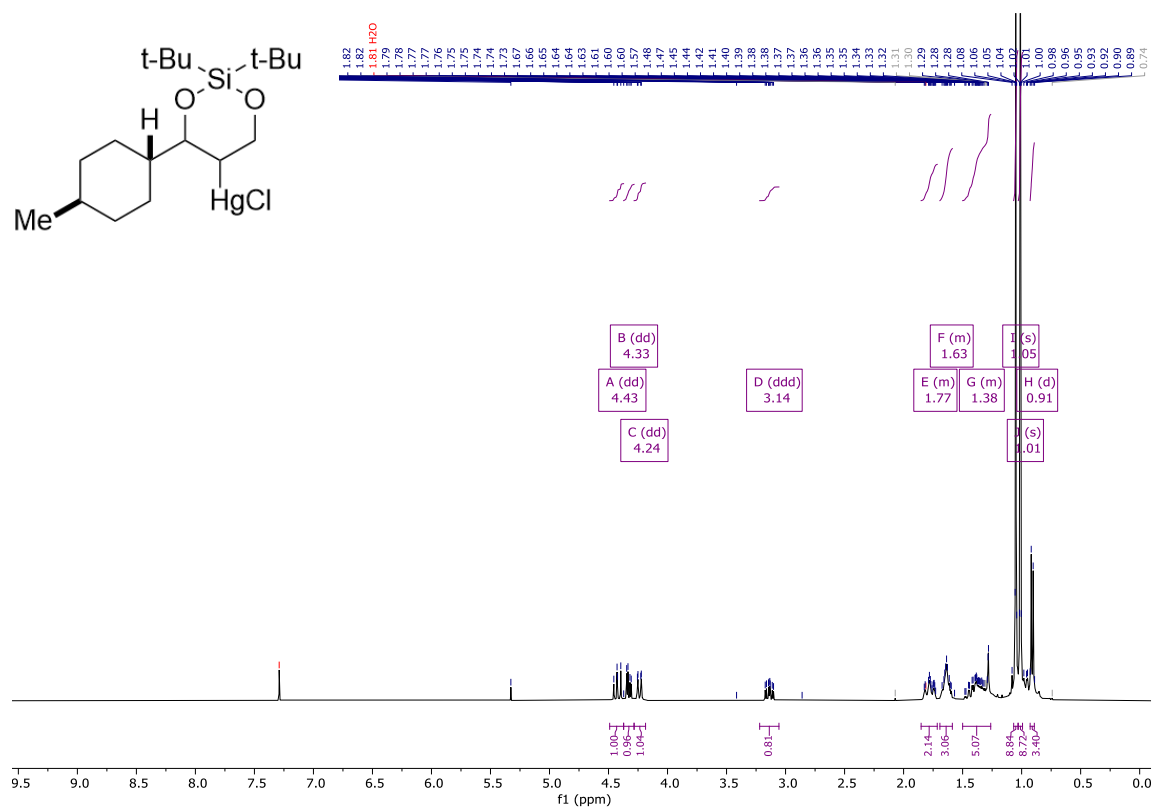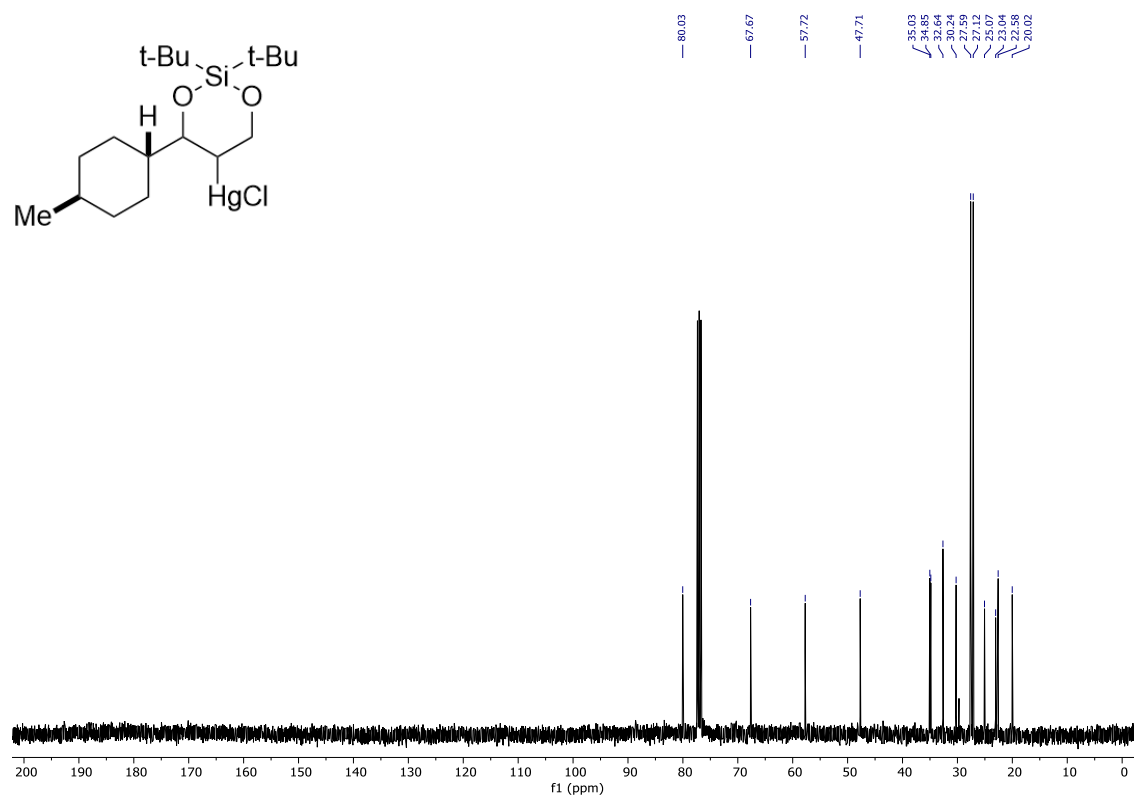

Compound 16 ( $^1\text{H}$  NMR: 400 MHz,  $^{13}\text{C}$  NMR: 100 MHz)

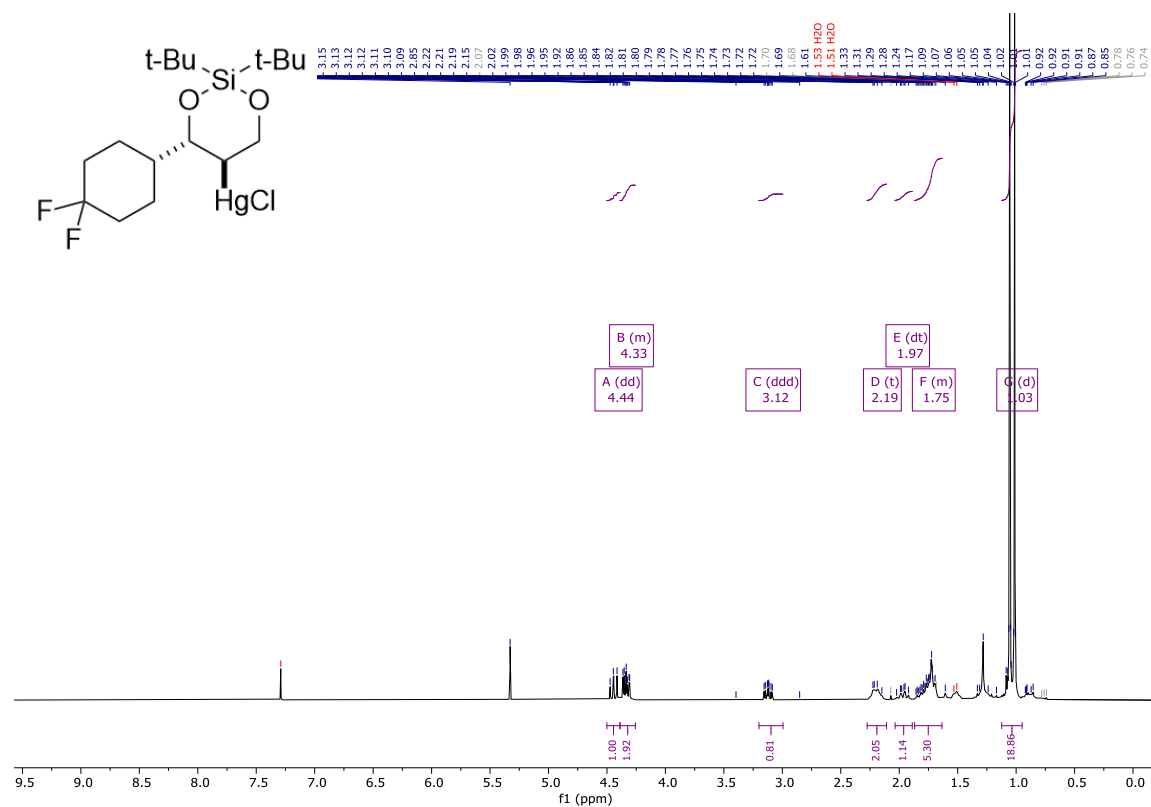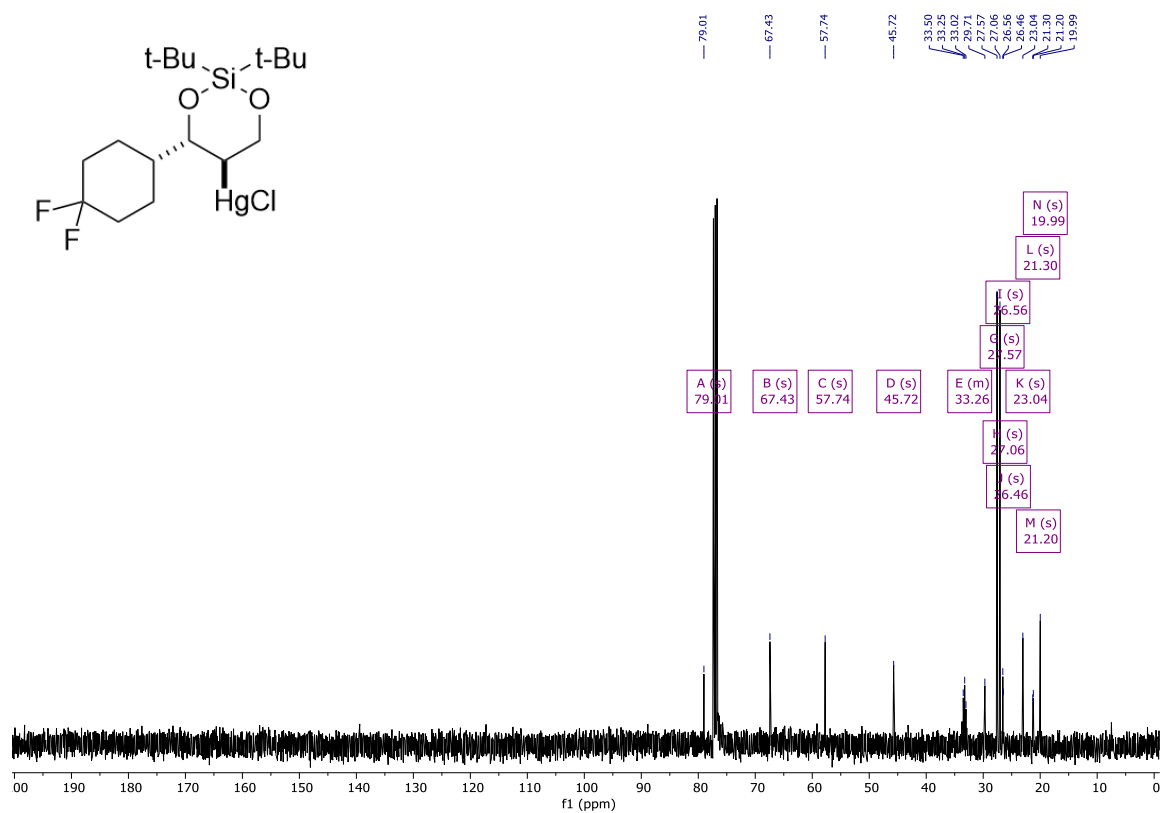

# Compound 17 (<sup>1</sup>H NMR: 400 MHz, <sup>13</sup>C NMR: 100 MHz)

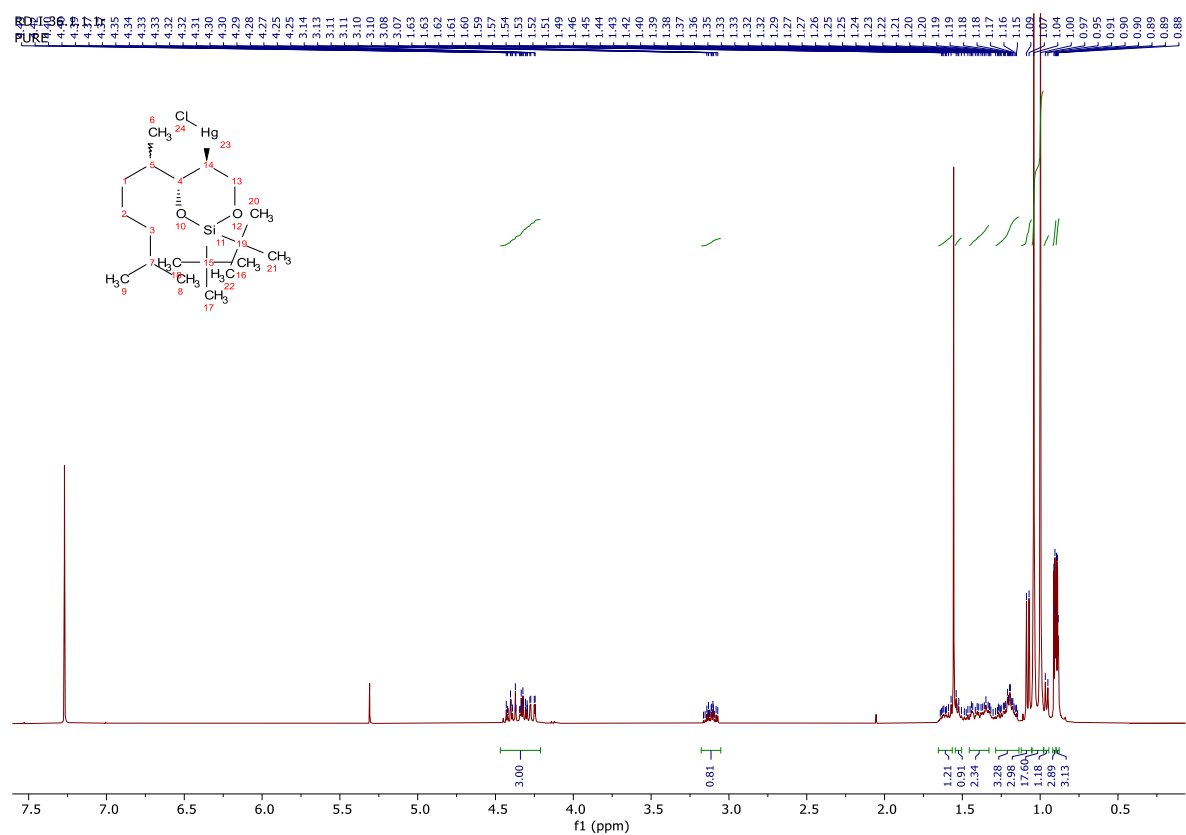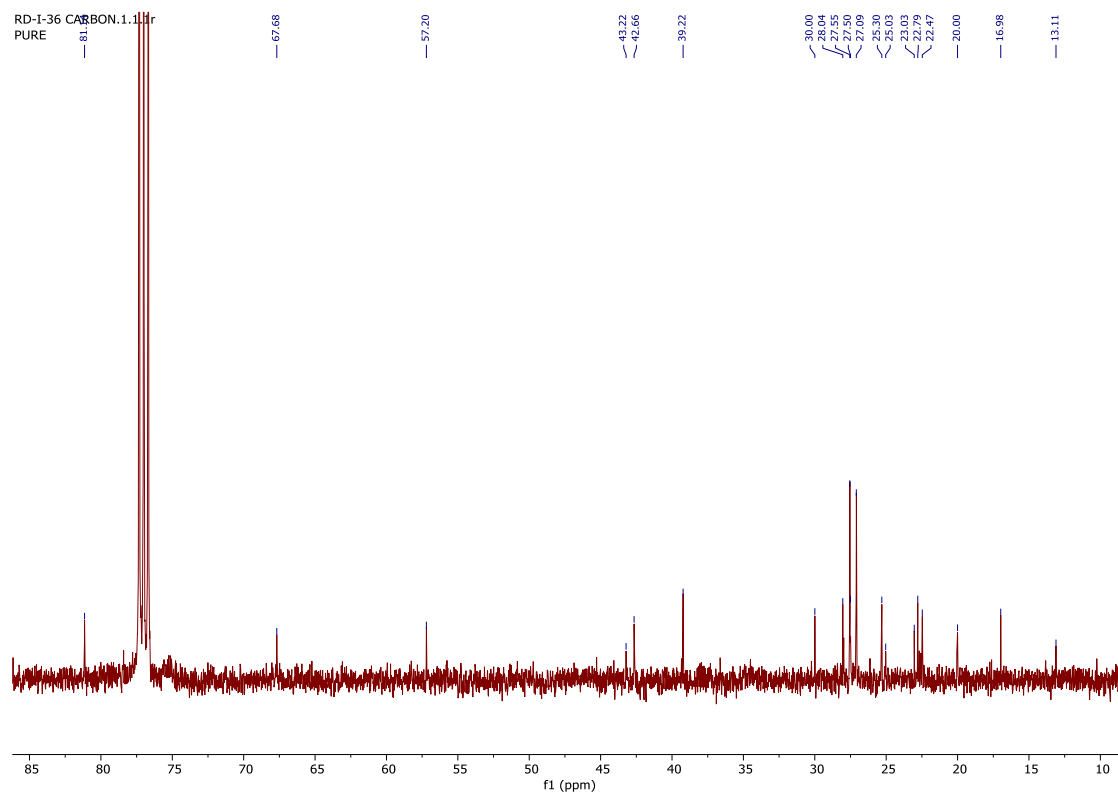

**Compound 18 ( $^1\text{H}$  NMR: 400 MHz,  $^{13}\text{C}$  NMR: 100 MHz)**

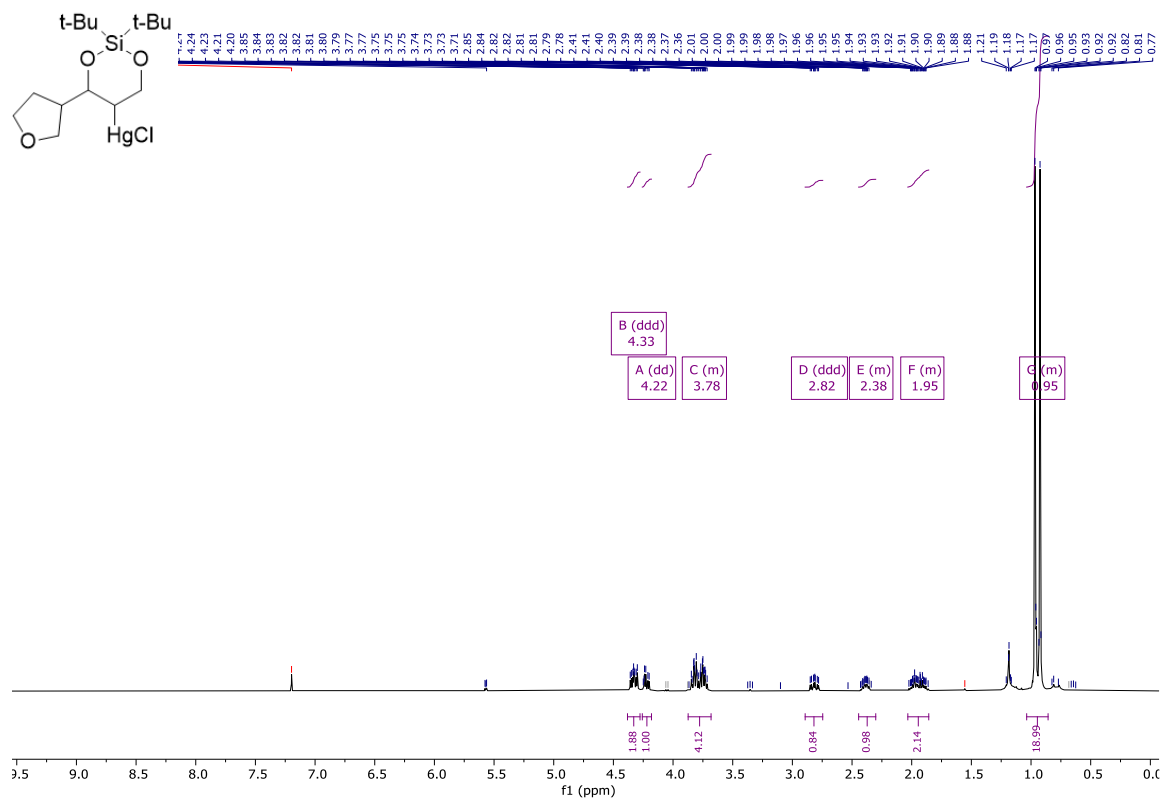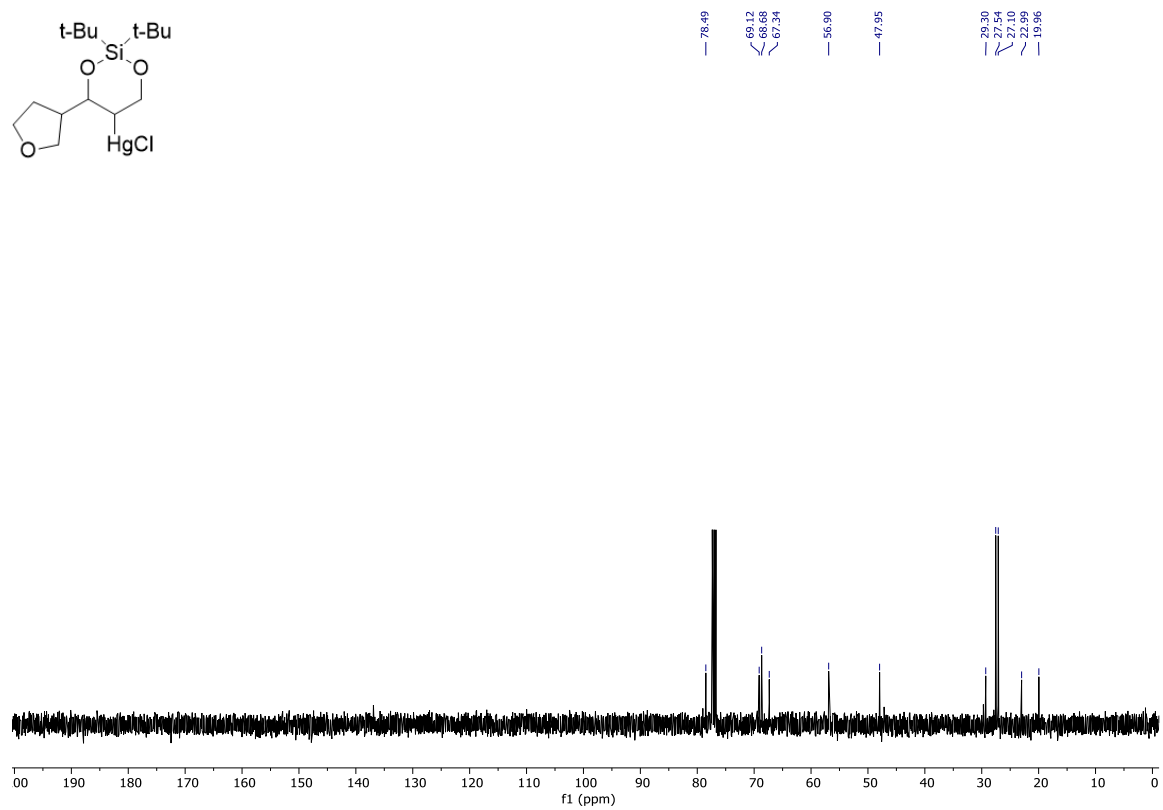

# Compound 20 (<sup>1</sup>H NMR: 400 MHz, <sup>13</sup>C NMR: 100 MHz)

RD-1-7 Pure.2.1.1r  
Pure

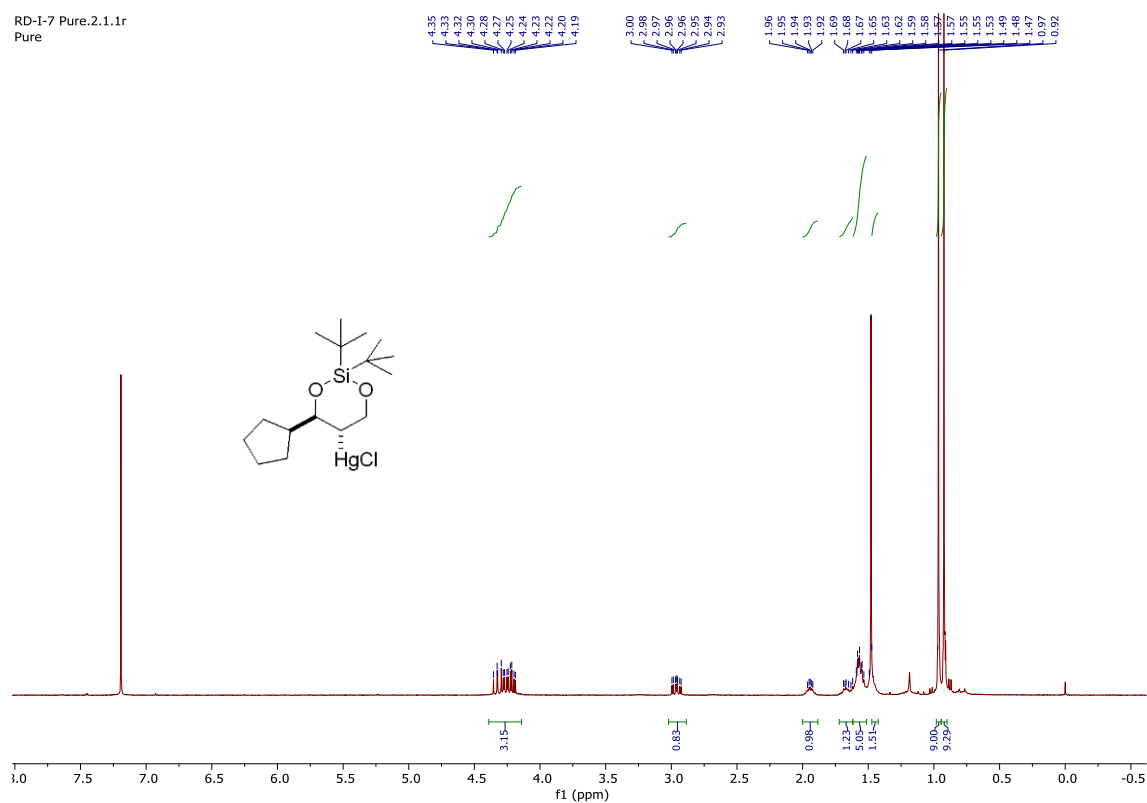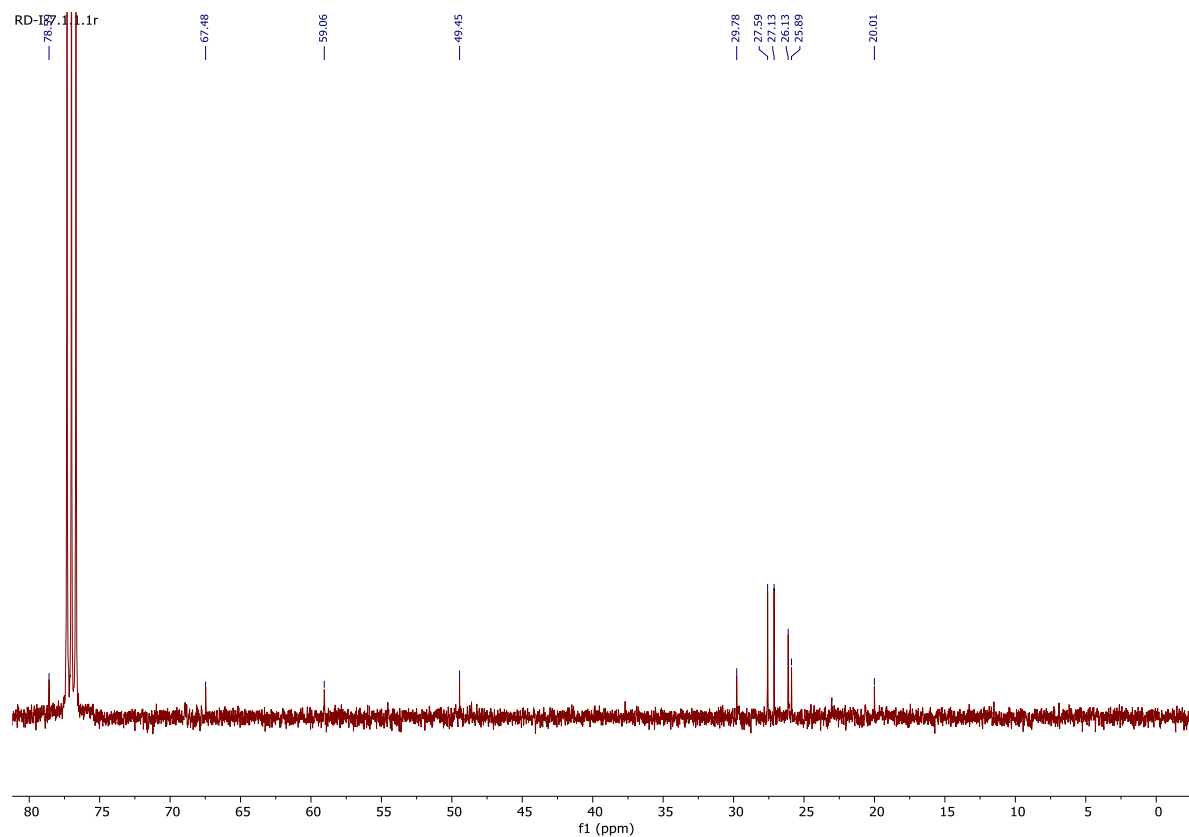

# Compound 21 (<sup>1</sup>H NMR: 400 MHz, <sup>13</sup>C NMR: 100 MHz)

RD-I-52.2.1.1r

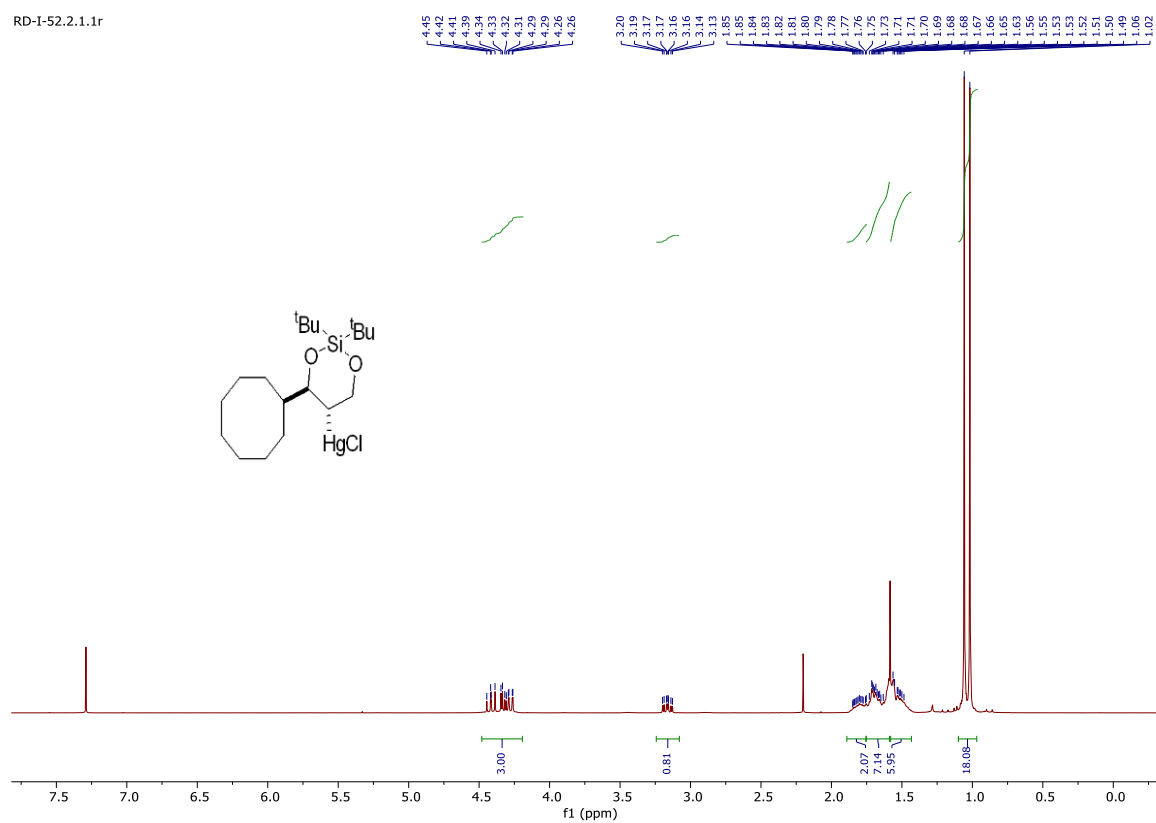

RD-I-52.2.1.1r

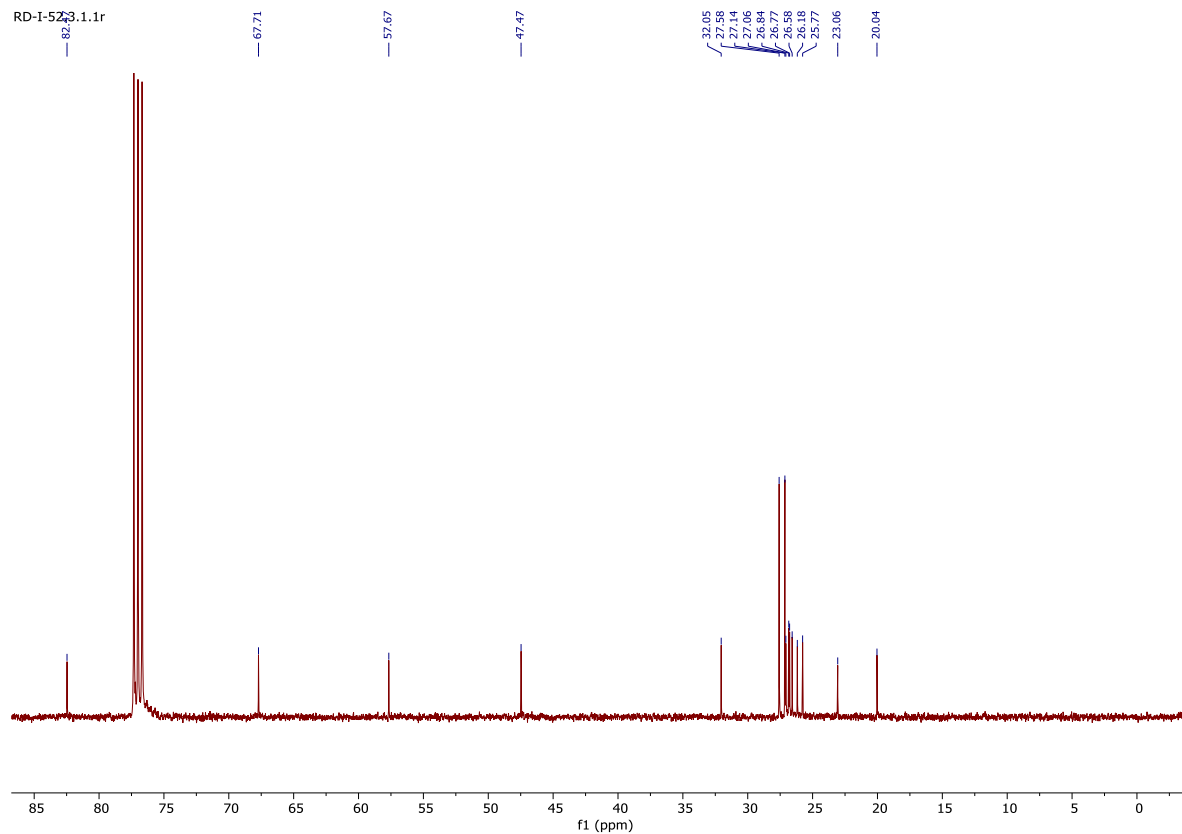

**Compound 22 ( $^1\text{H}$  NMR: 400 MHz,  $^{13}\text{C}$  NMR: 100 MHz)**

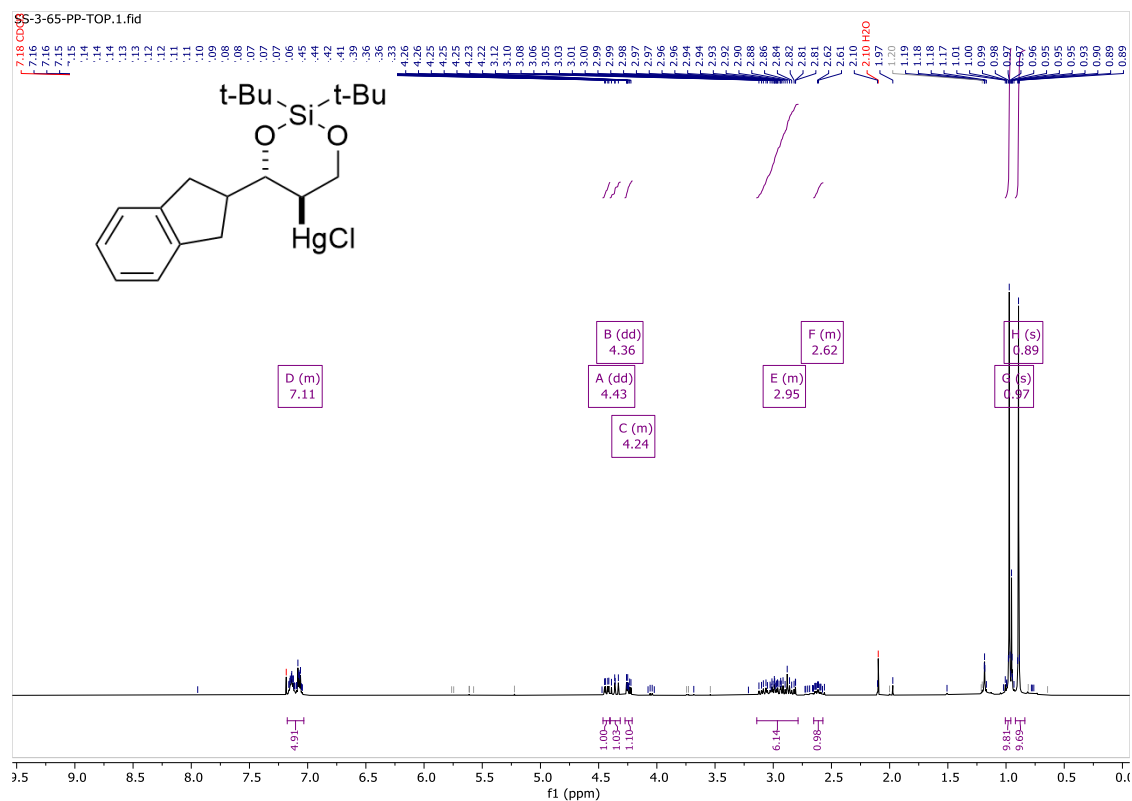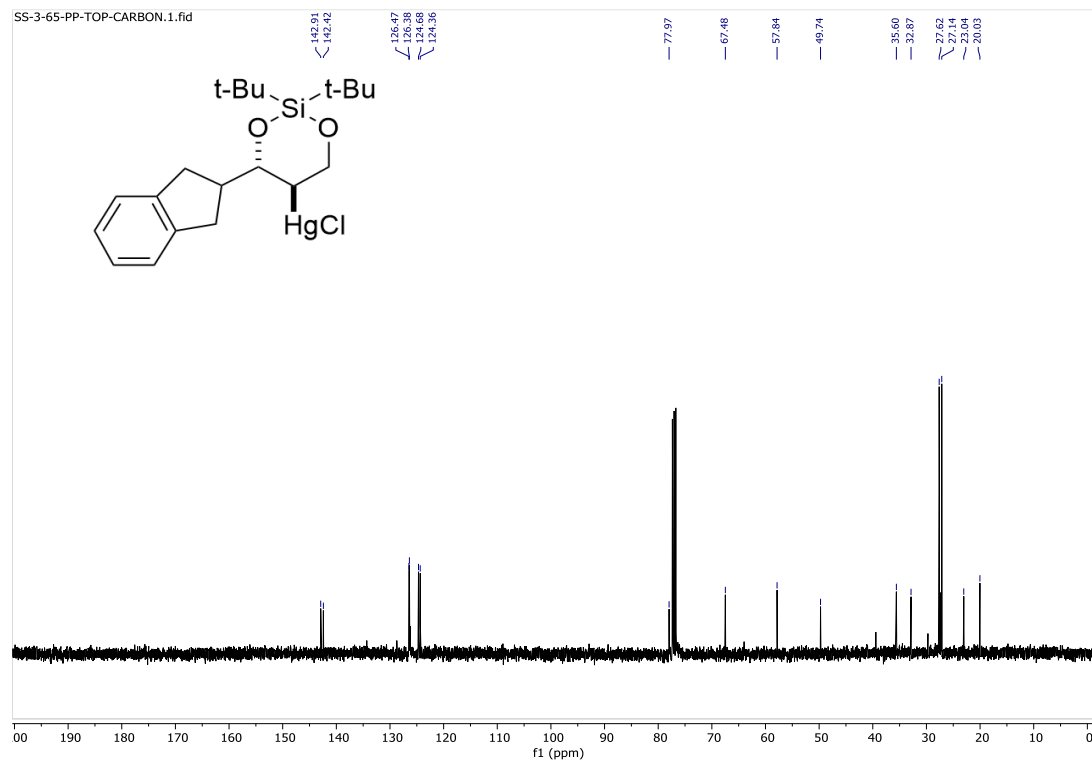

# Compound 23 (<sup>1</sup>H NMR: 400 MHz, <sup>13</sup>C NMR: 100 MHz)

RD-I-14.1.1.1r  
Pure

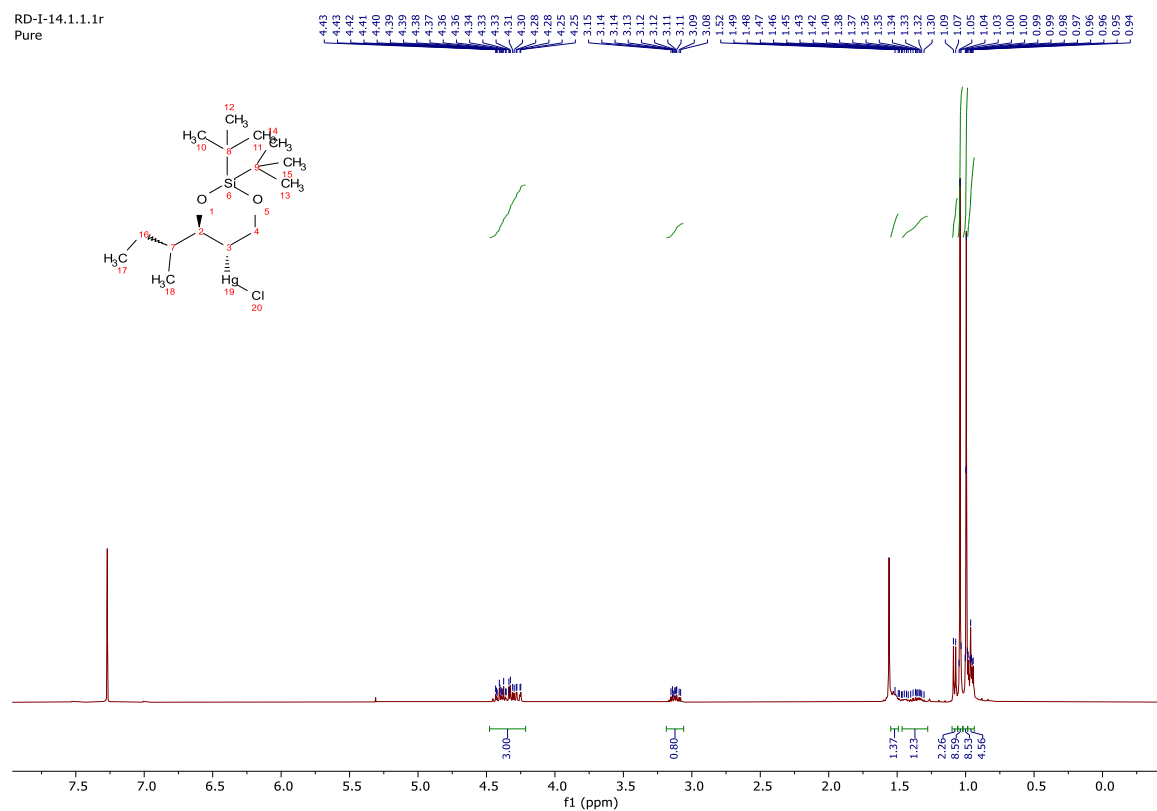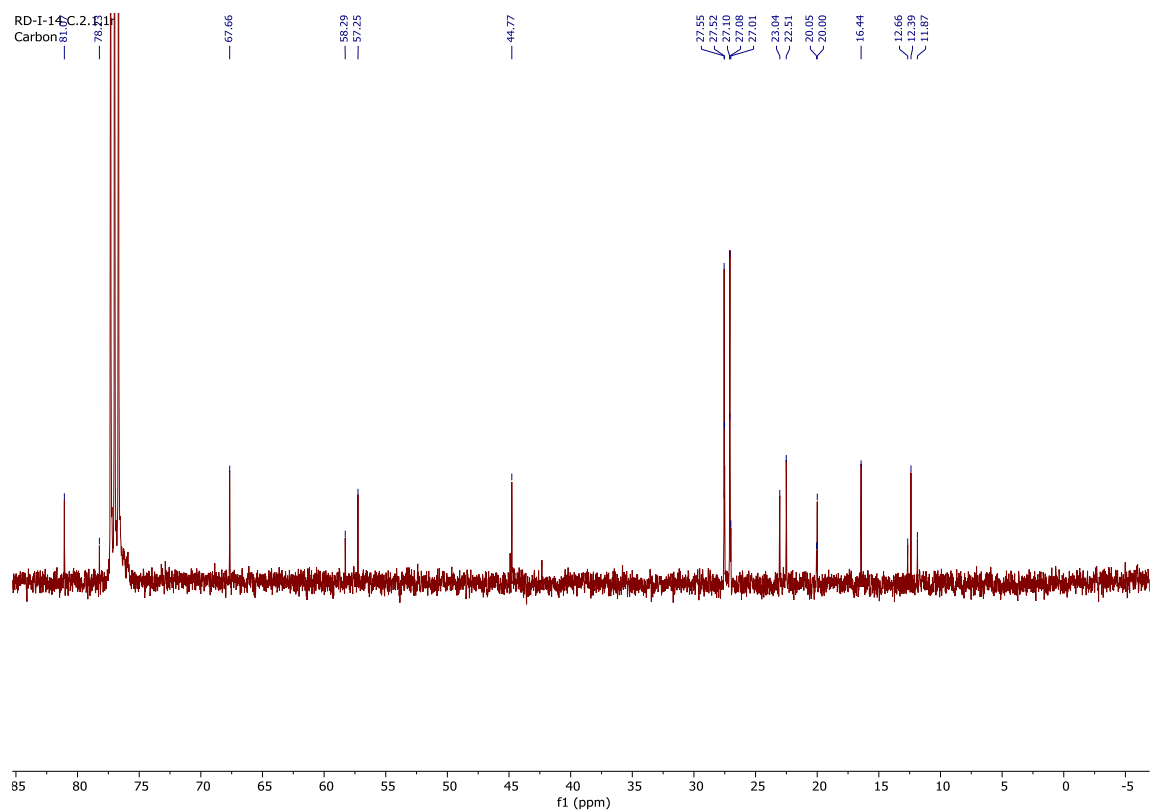



# Compound 24 (<sup>1</sup>H NMR: 400 MHz, <sup>13</sup>C NMR: 100 MHz)

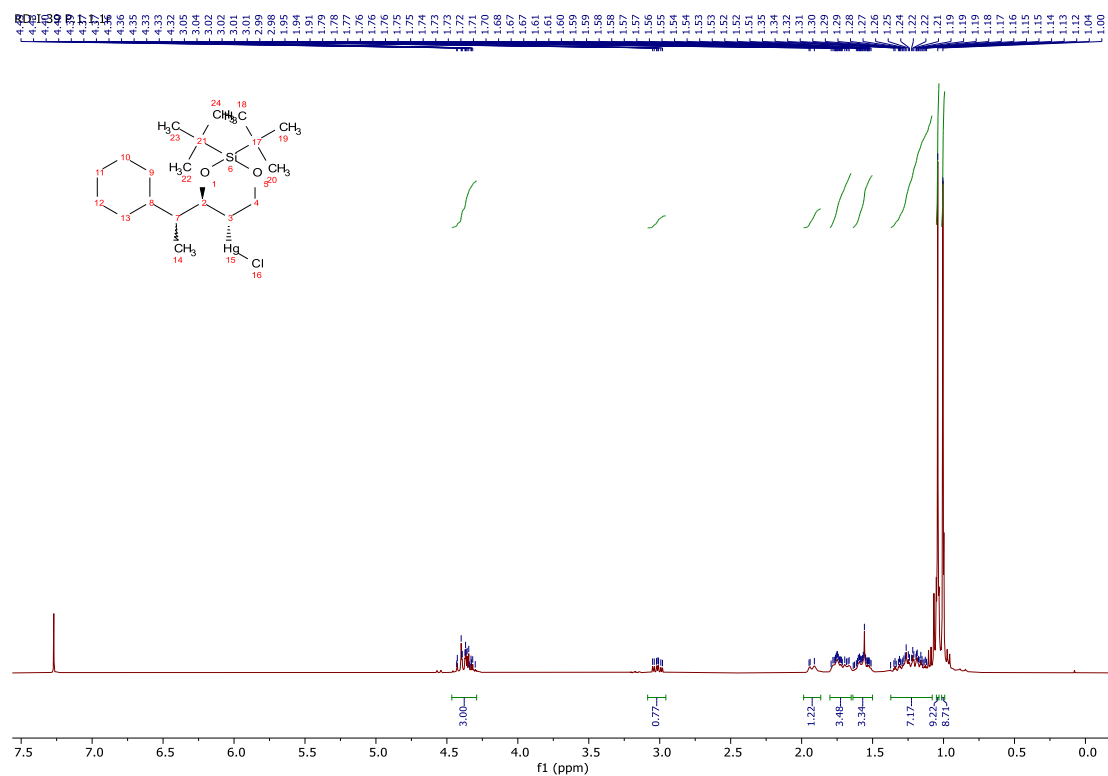

RD-I-39 Pure.1.1.1r  
Pure

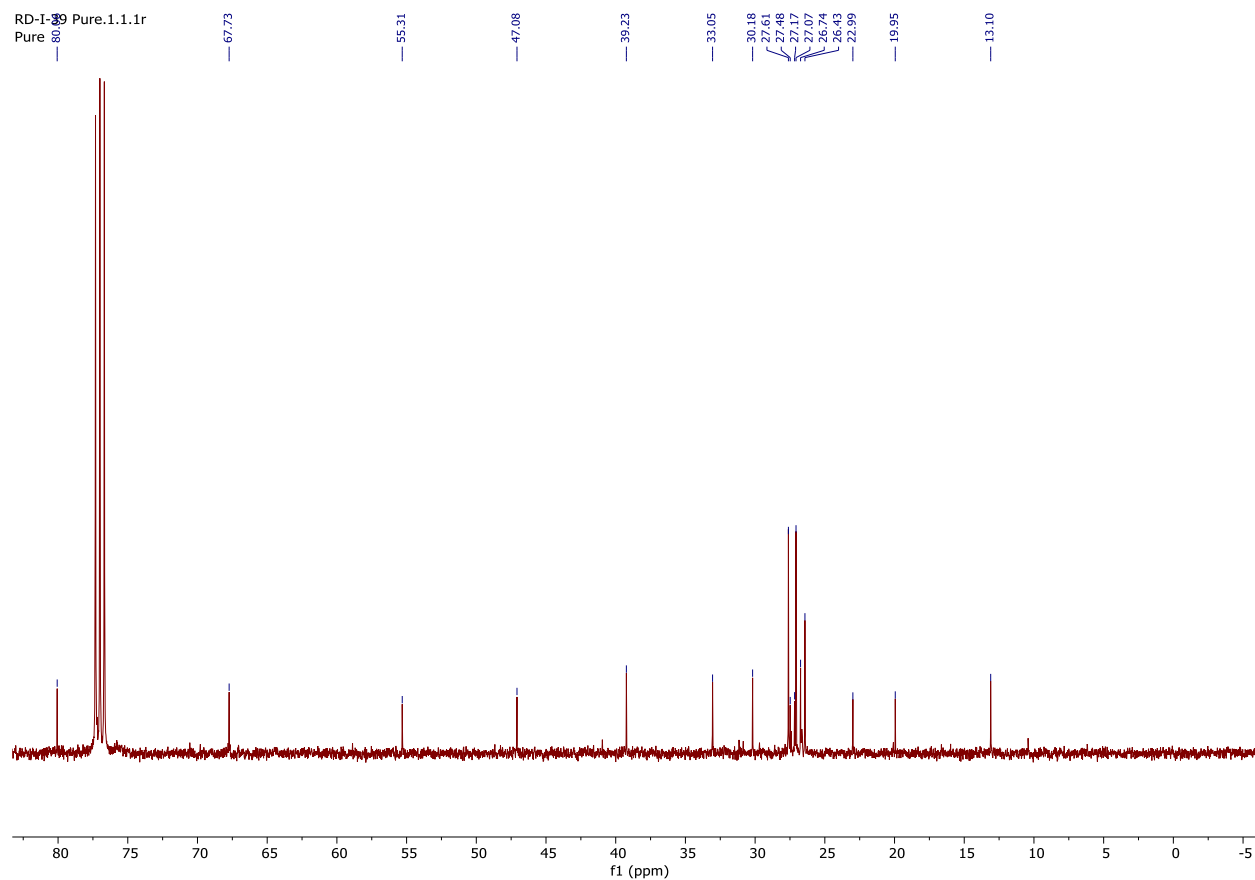

RD-I-65.1.1.1r  
PURE

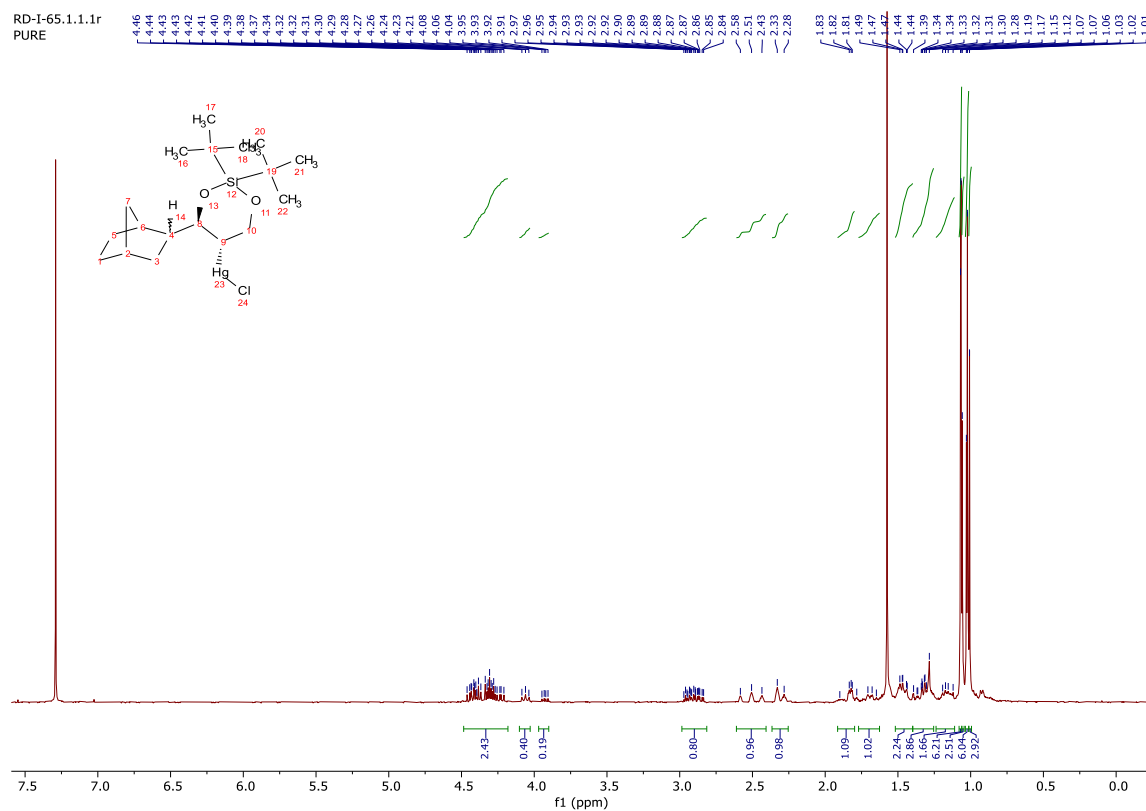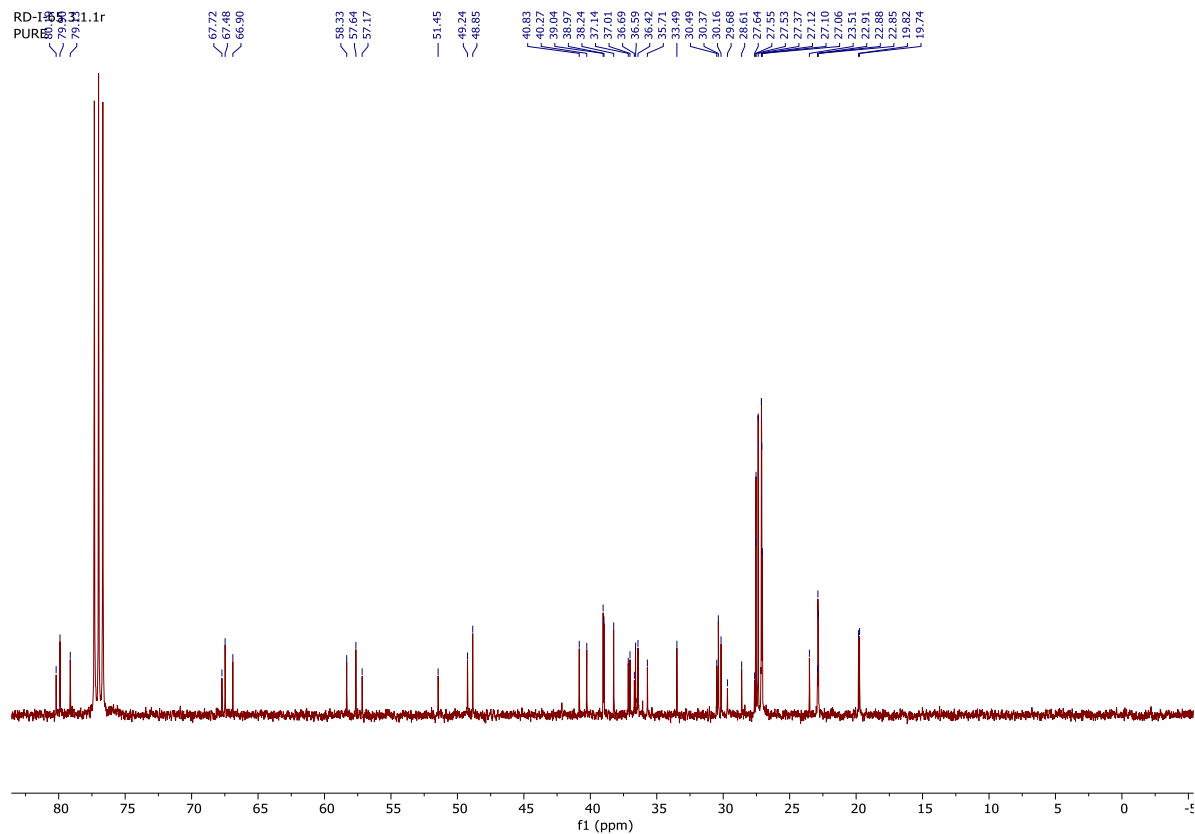

Compound 27 ( $^1\text{H}$  NMR: 400 MHz,  $^{13}\text{C}$  NMR: 100 MHz)

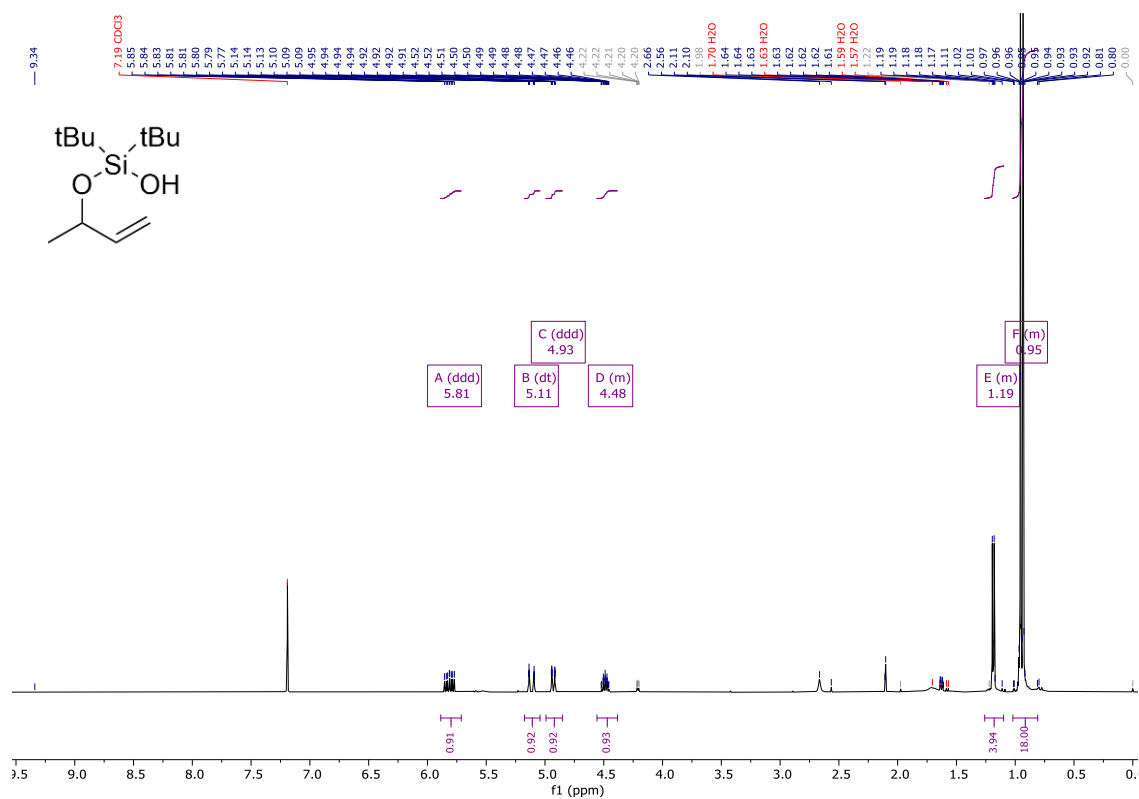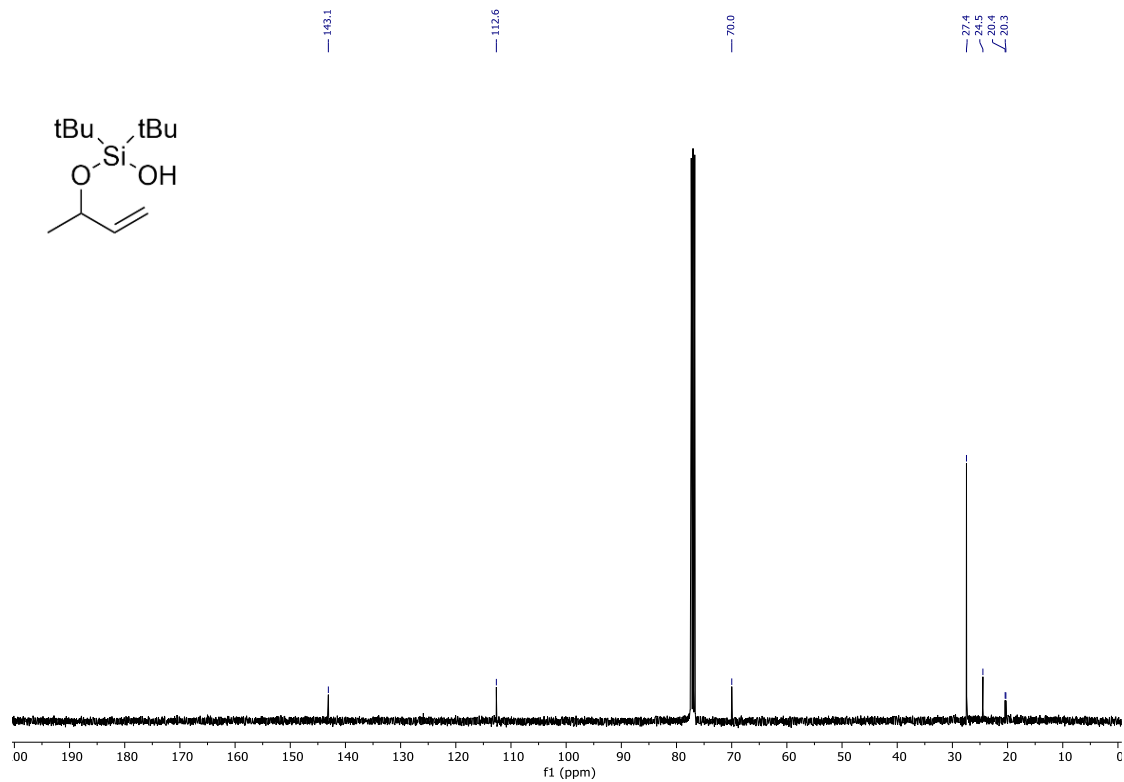

**Compound 29 ( $^1\text{H}$  NMR: 400 MHz,  $^{13}\text{C}$  NMR: 100 MHz)**

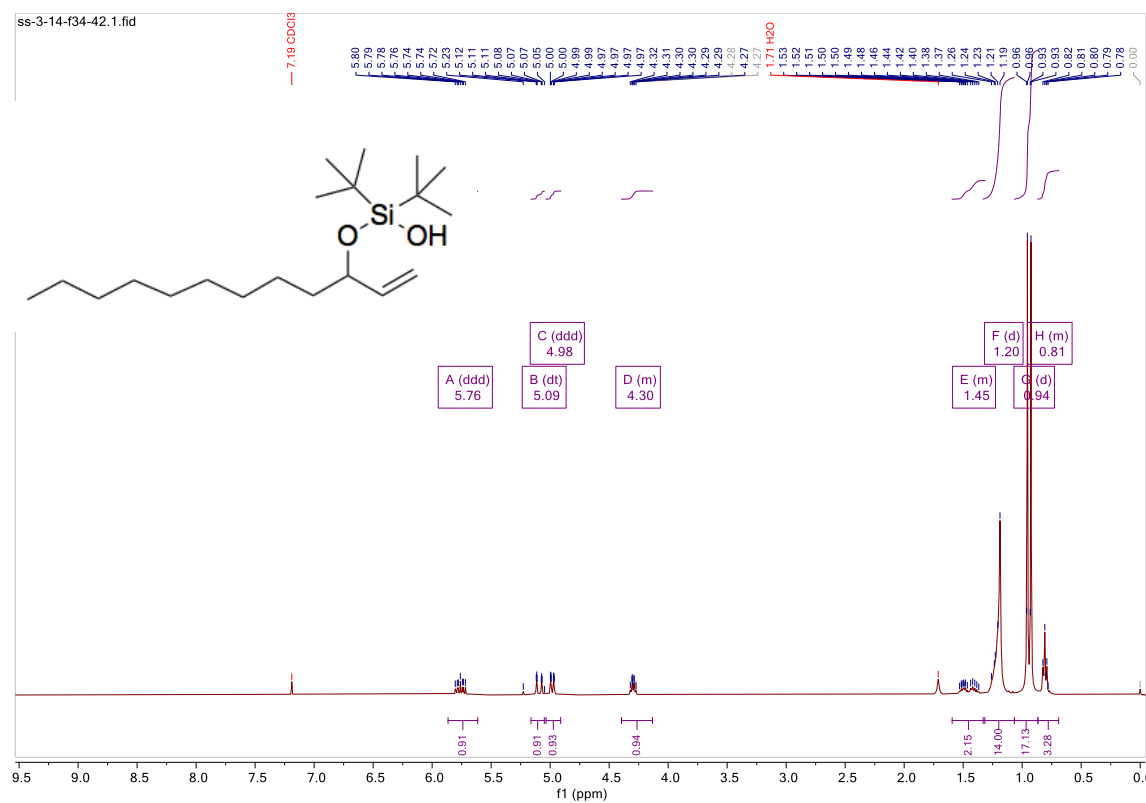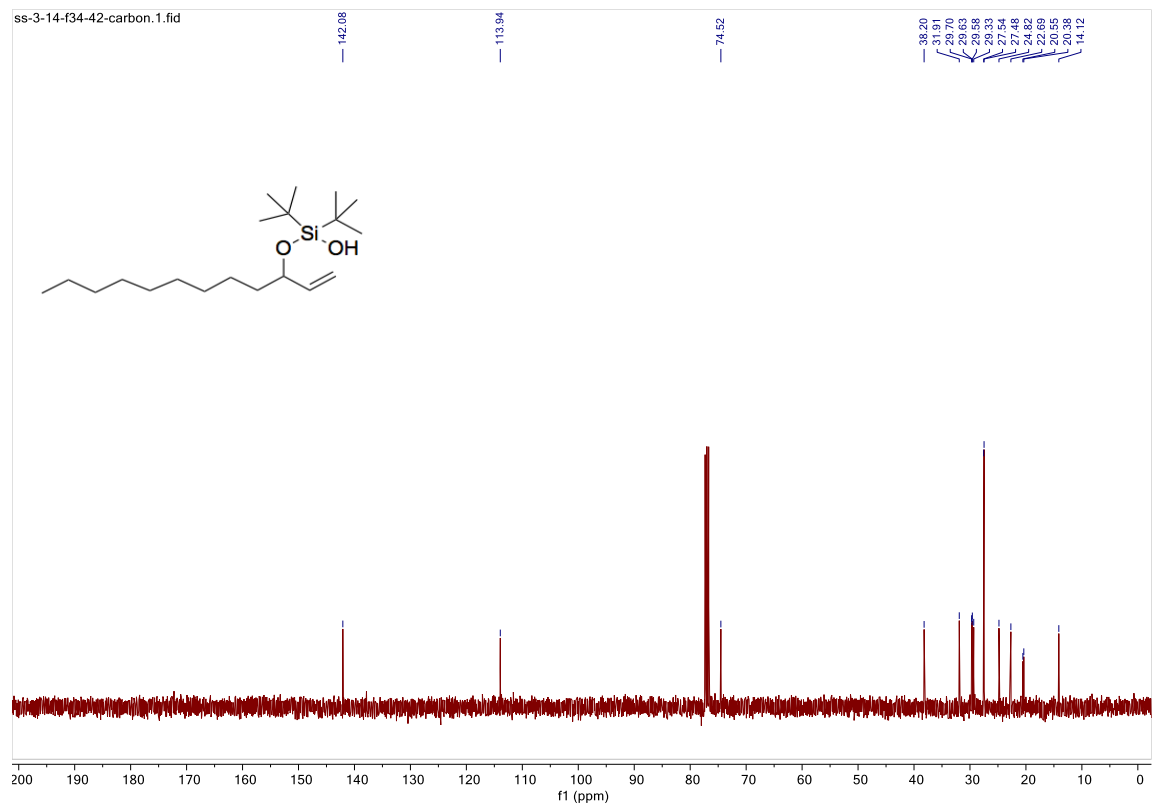

**Compound 31 ( $^1\text{H}$  NMR: 400 MHz,  $^{13}\text{C}$  NMR: 100 MHz)**

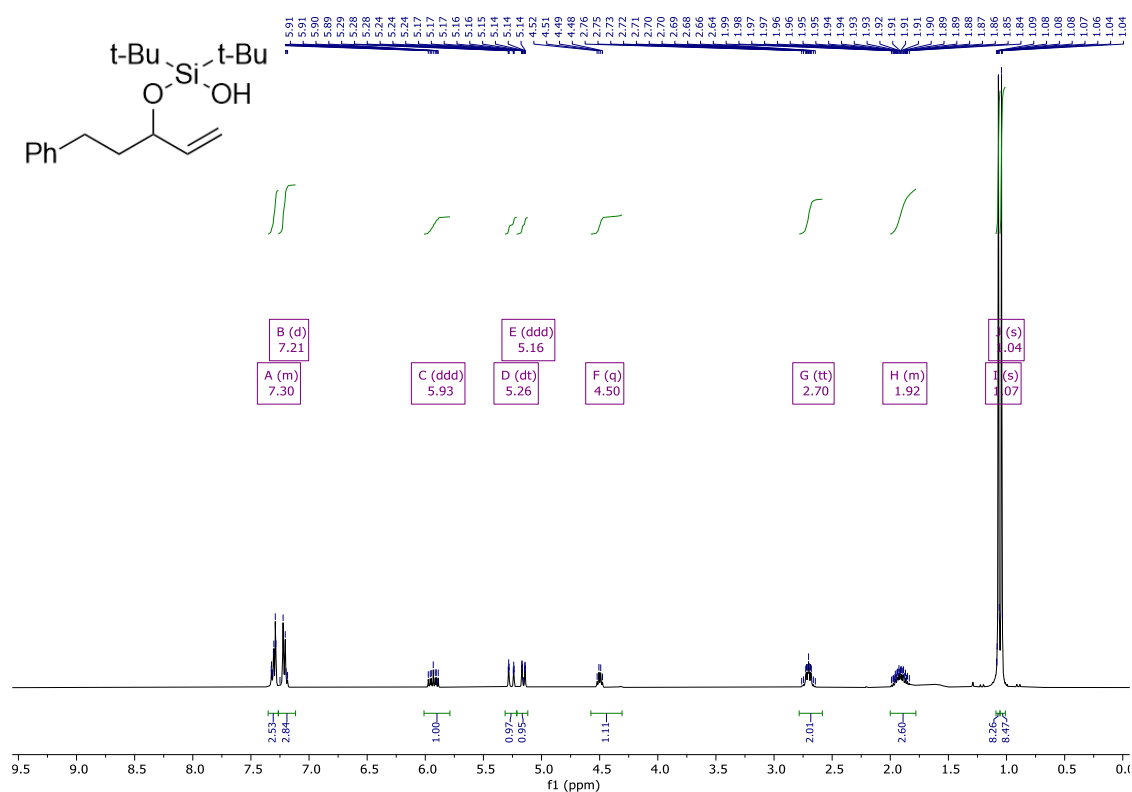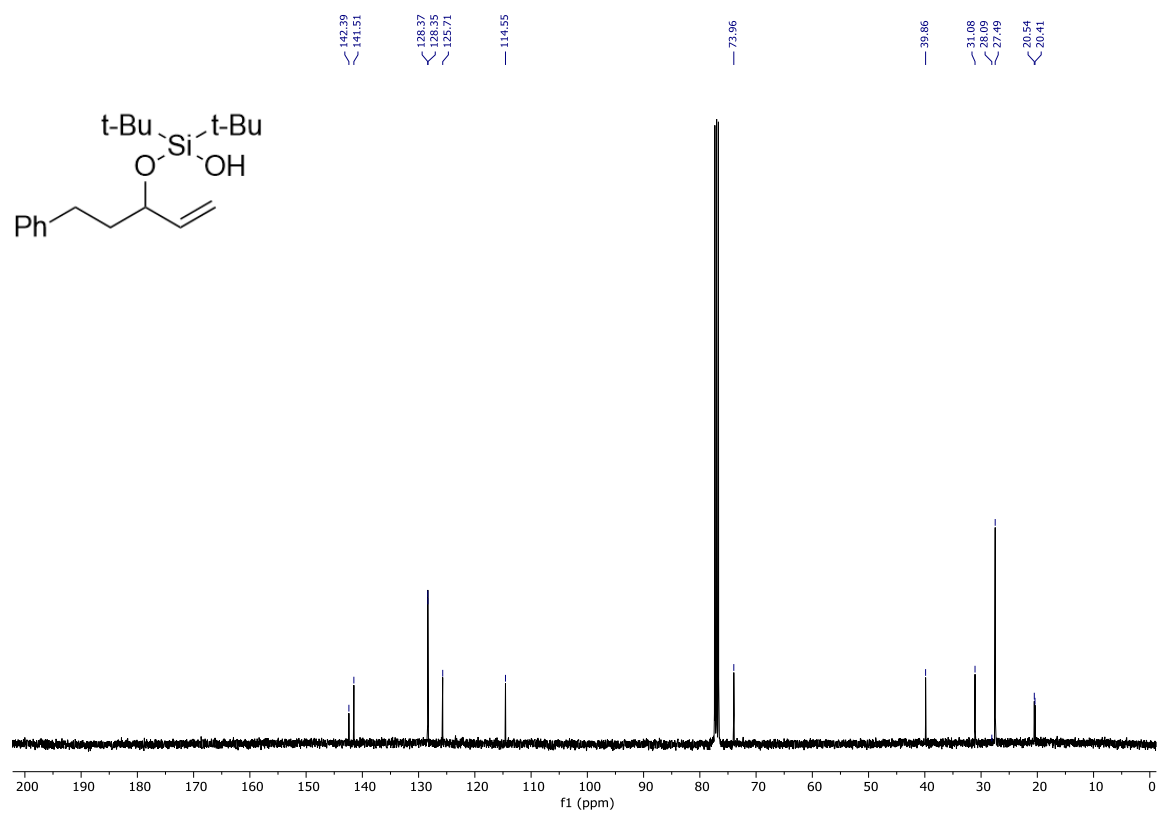

**Compound 33 ( $^1\text{H}$  NMR: 400 MHz,  $^{13}\text{C}$  NMR: 100 MHz)**

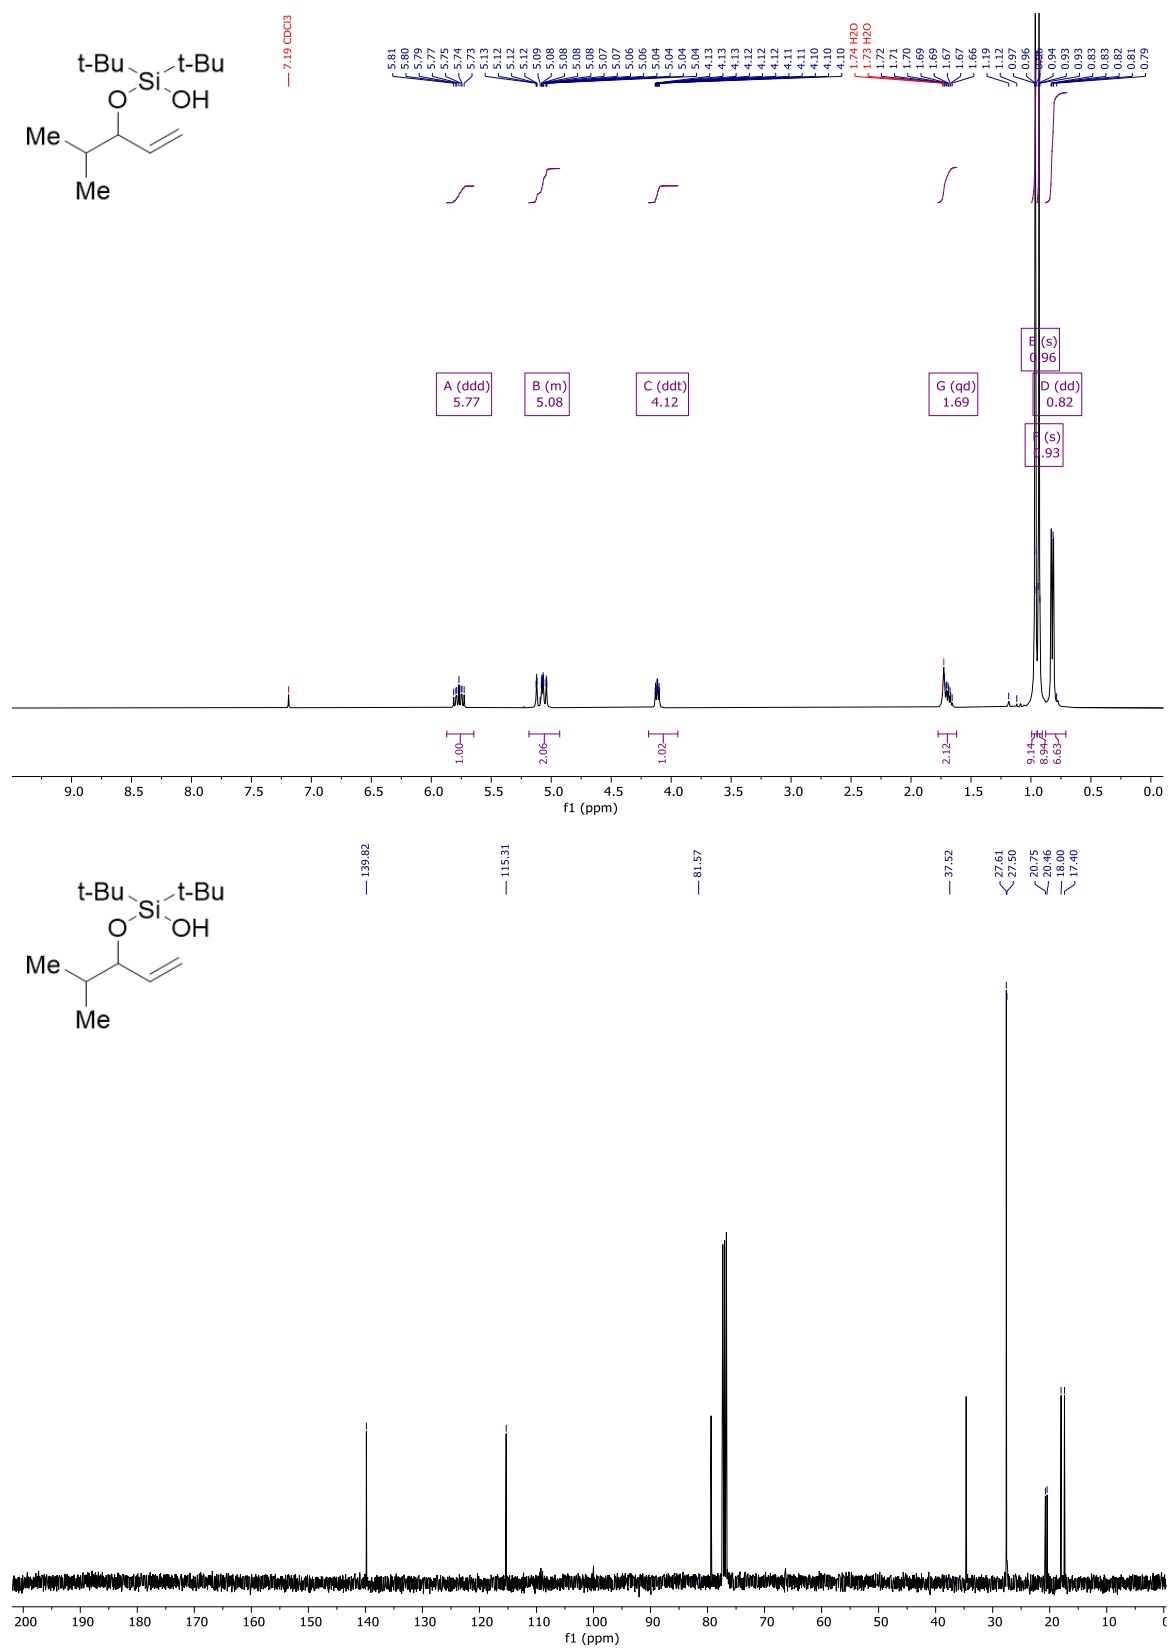

**Compound 34 ( $^1\text{H}$  NMR: 400 MHz,  $^{13}\text{C}$  NMR: 100 MHz)**

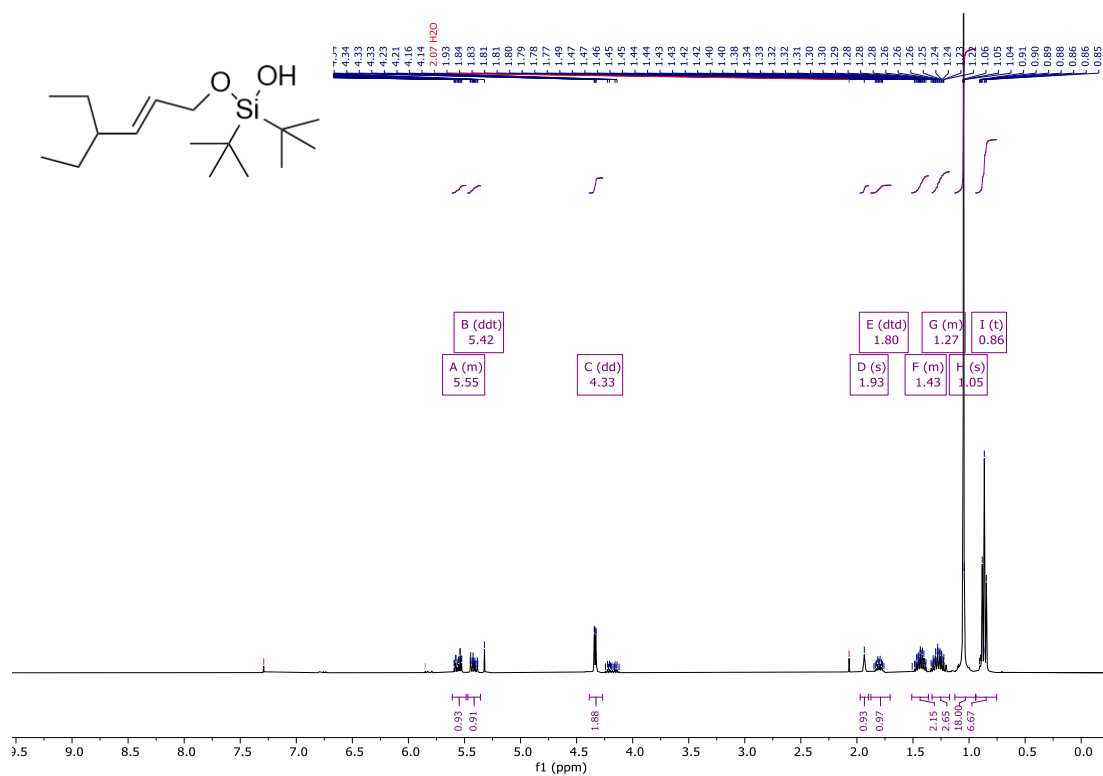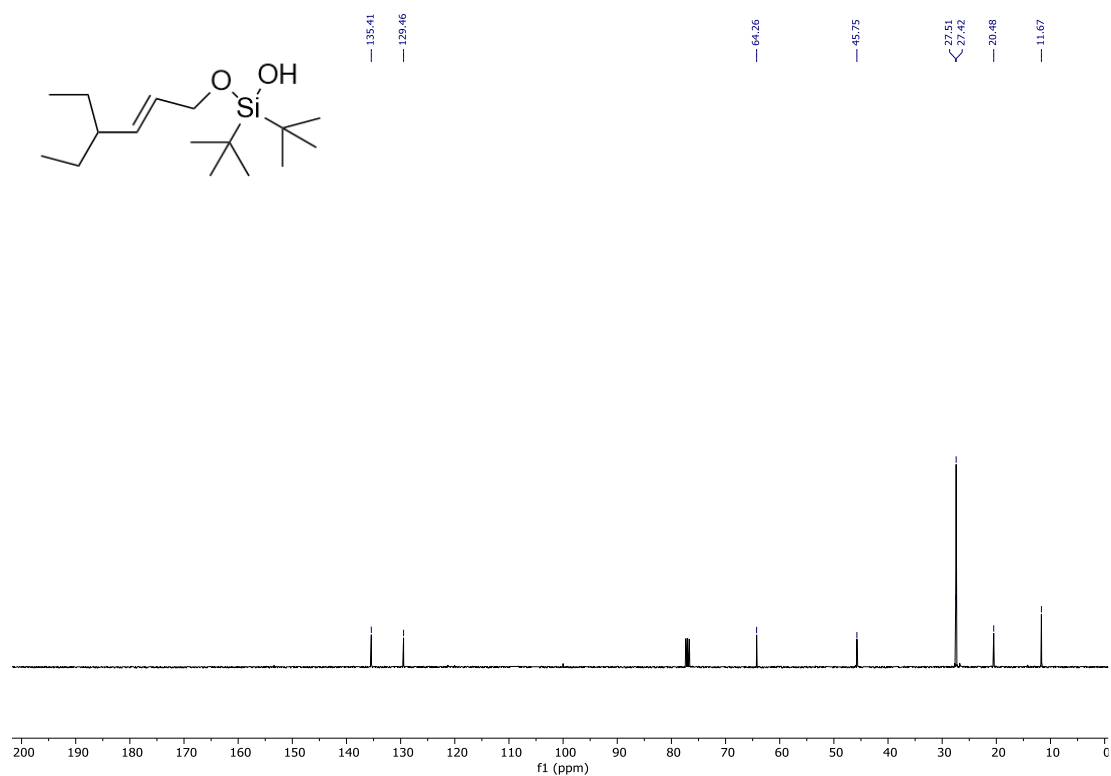

**Compound 35 ( $^1\text{H}$  NMR: 400 MHz,  $^{13}\text{C}$  NMR: 100 MHz)**

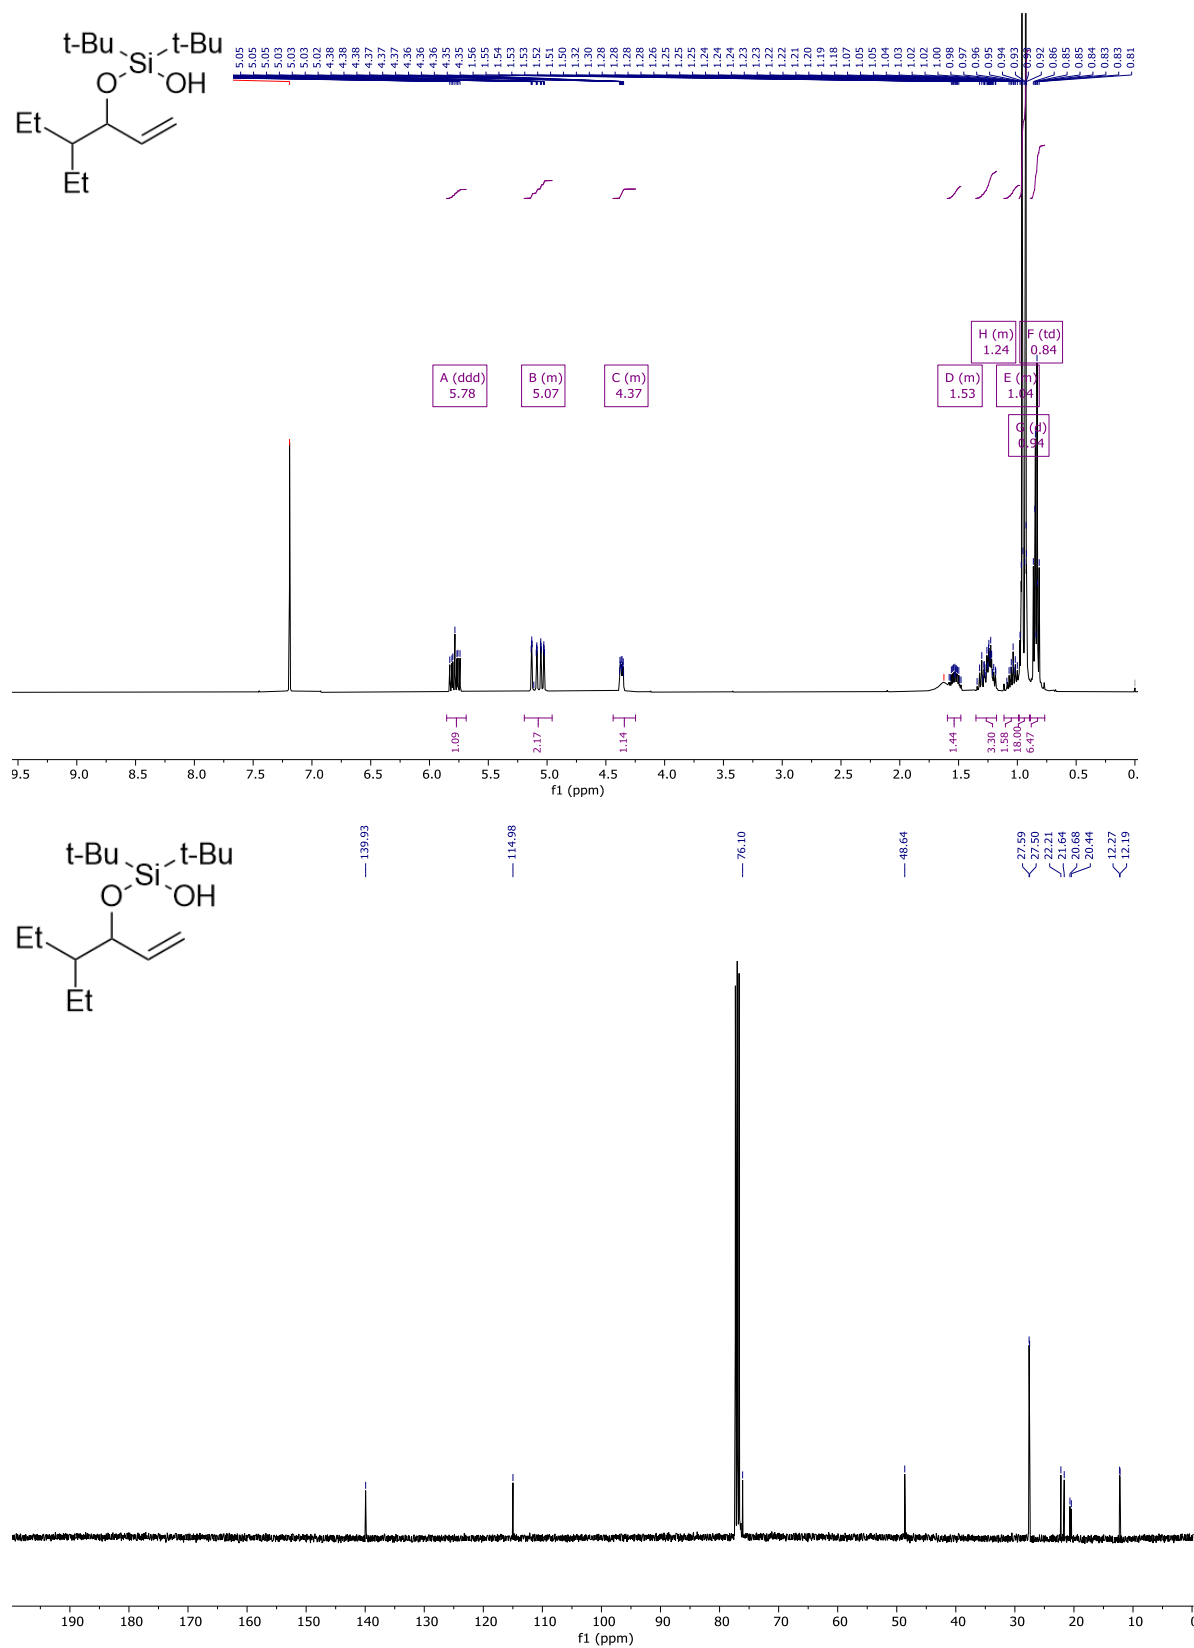



# Compound 36 (<sup>1</sup>H NMR: 400 MHz, <sup>13</sup>C NMR: 100 MHz)

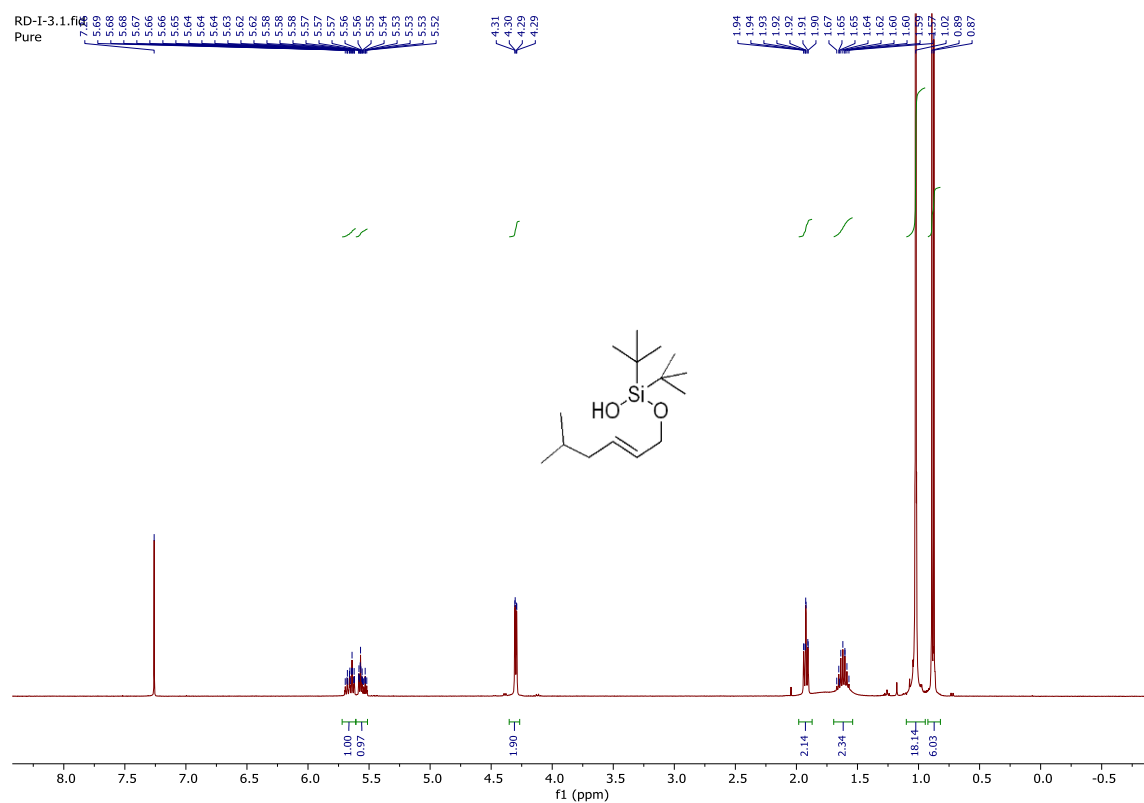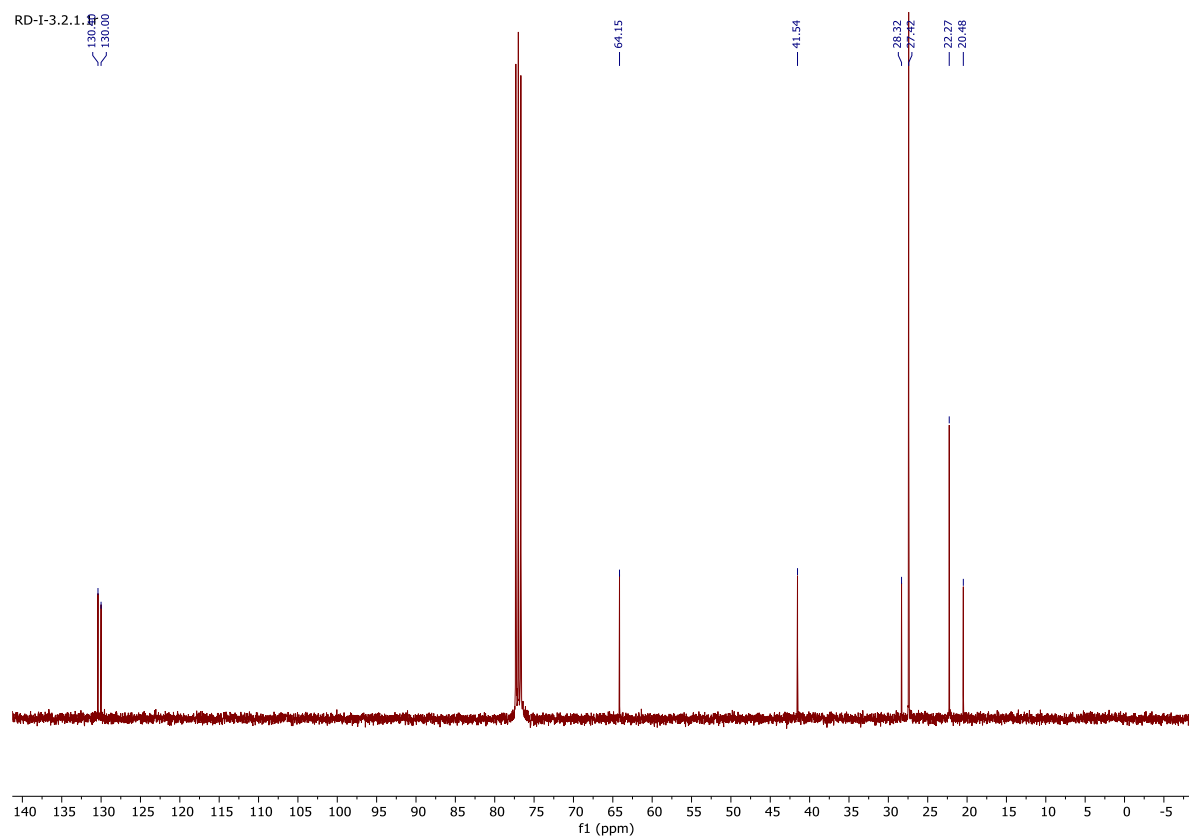

[illegible]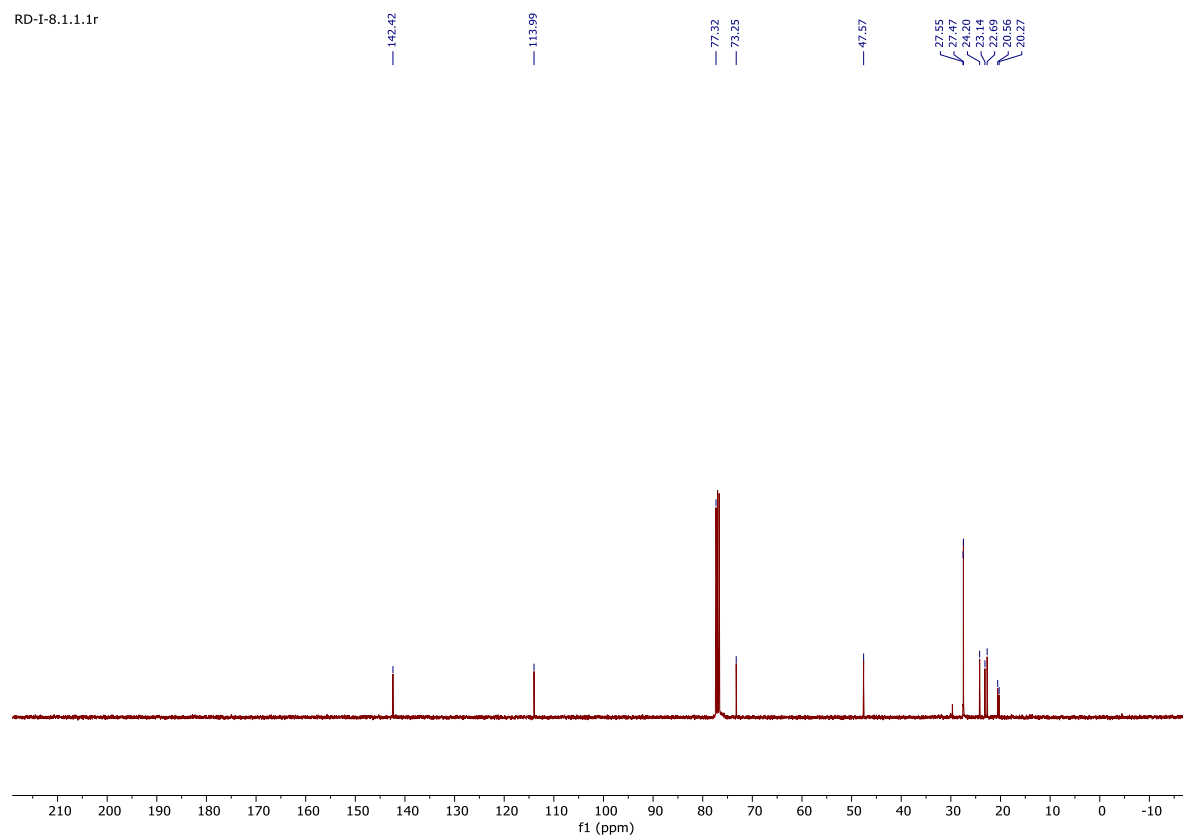

**Compound 40 ( $^1\text{H}$  NMR: 400 MHz,  $^{13}\text{C}$  NMR: 100 MHz)**

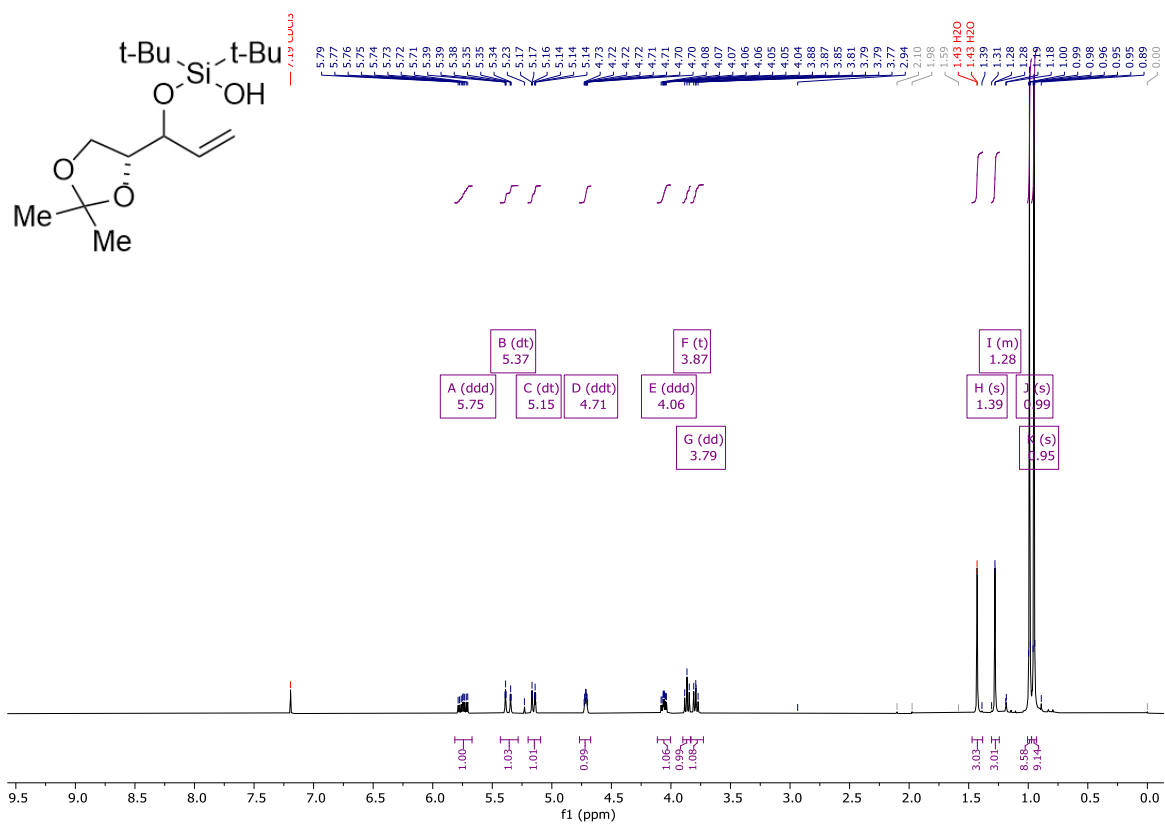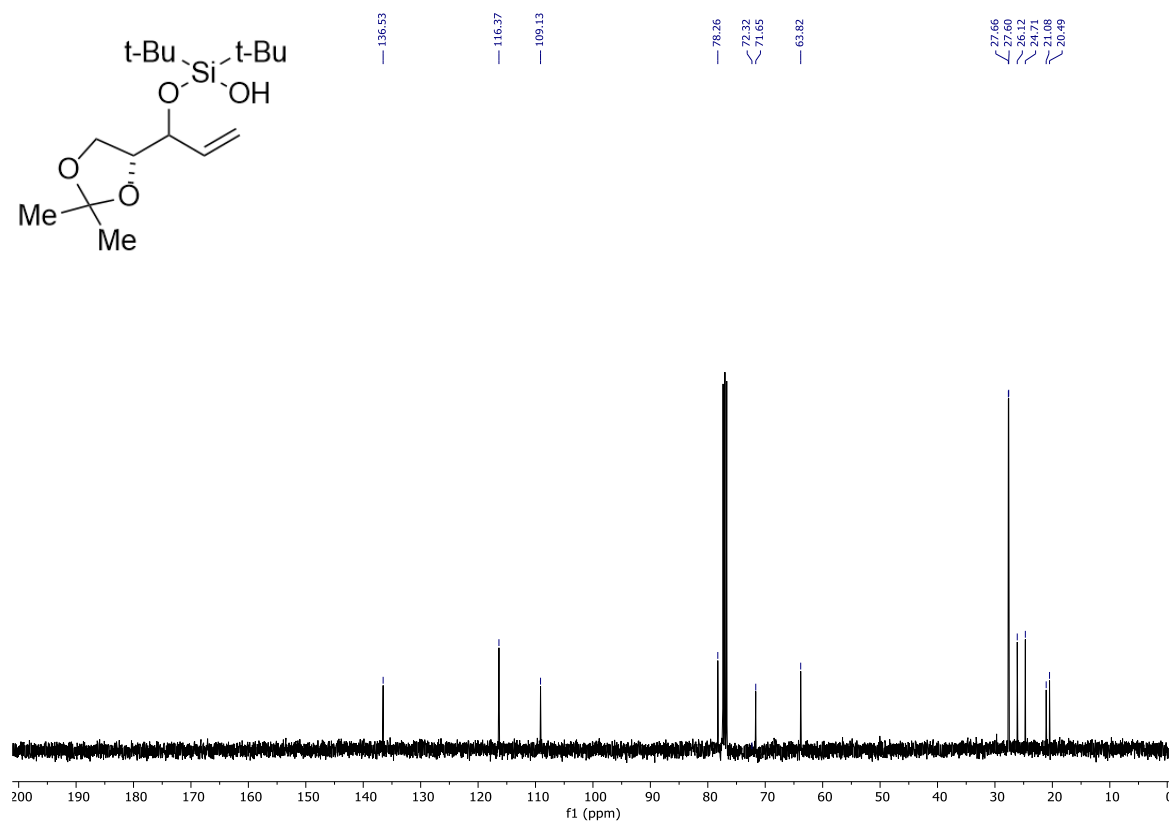

**Compound 41 ( $^1\text{H}$  NMR: 400 MHz,  $^{13}\text{C}$  NMR: 100 MHz)**

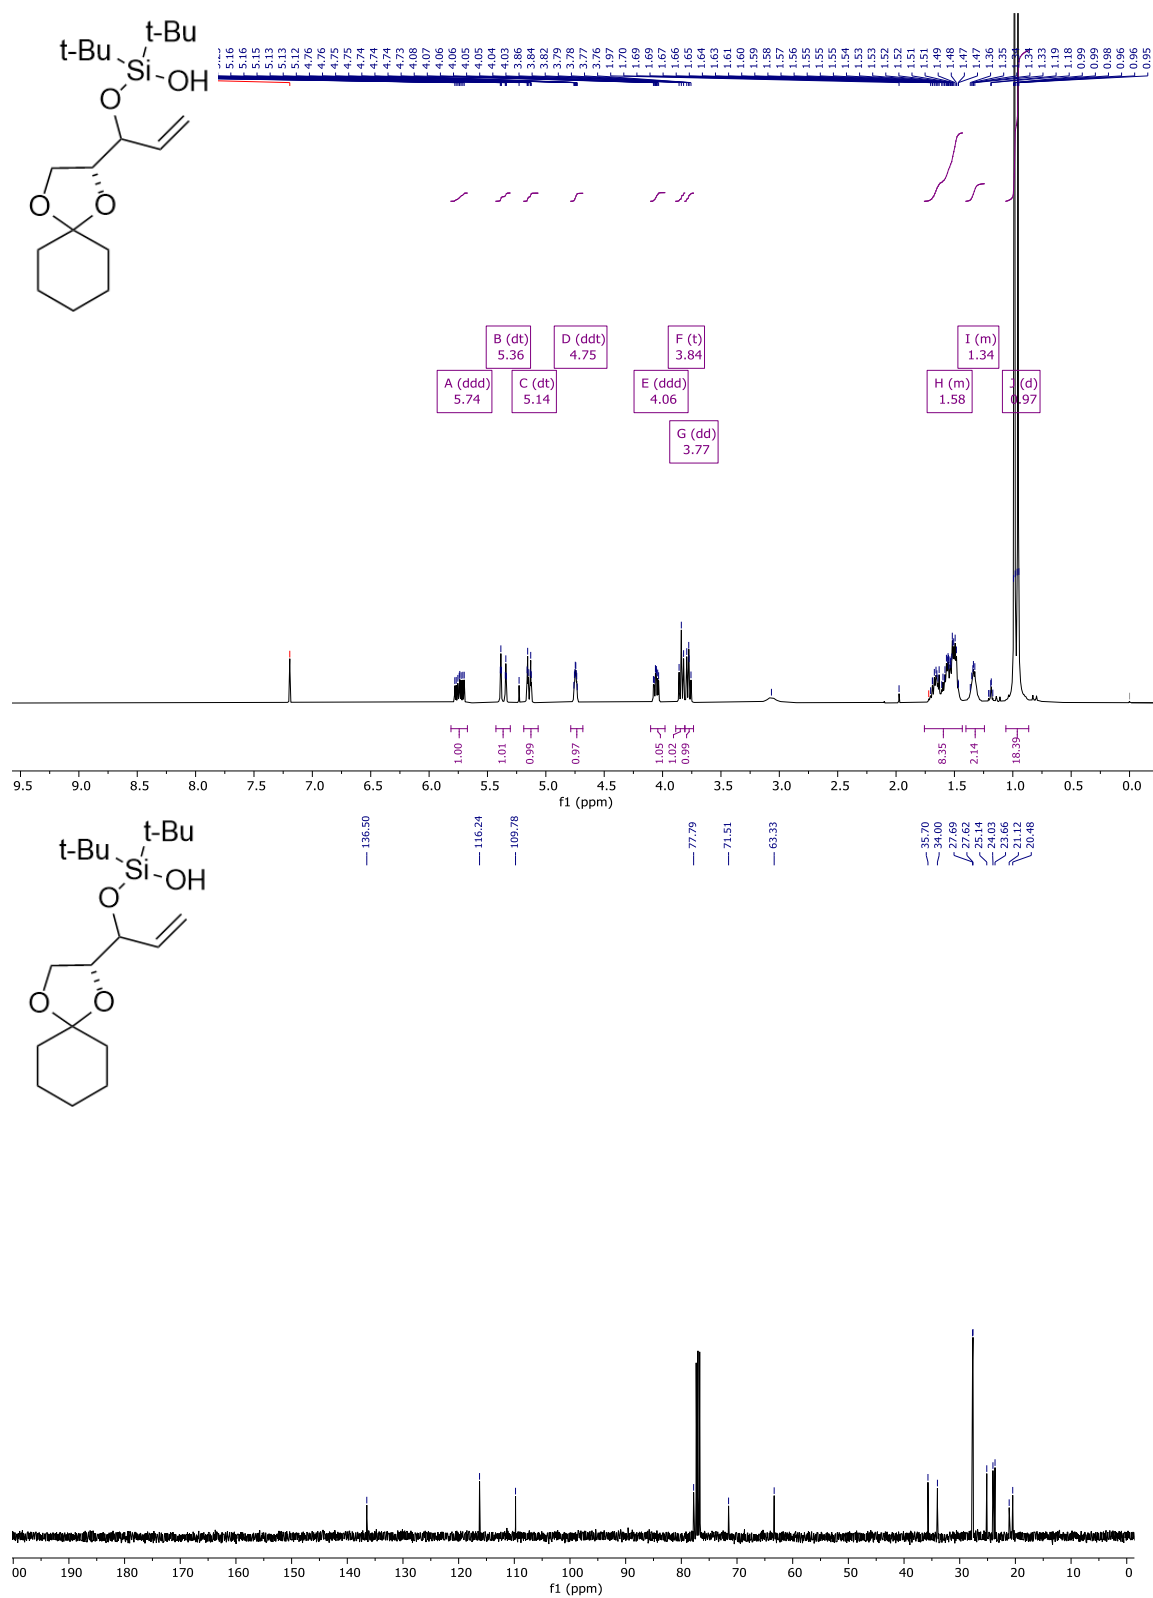

**Compound 42 ( $^1\text{H}$  NMR: 400 MHz,  $^{13}\text{C}$  NMR: 100 MHz)**

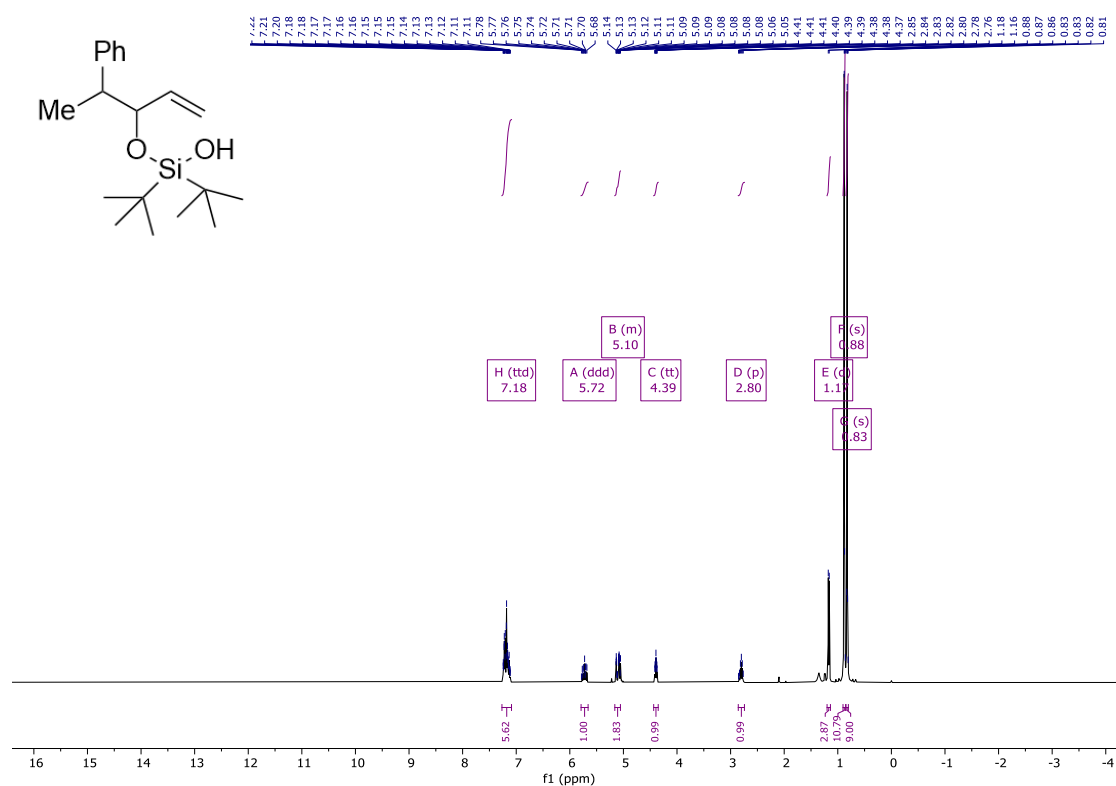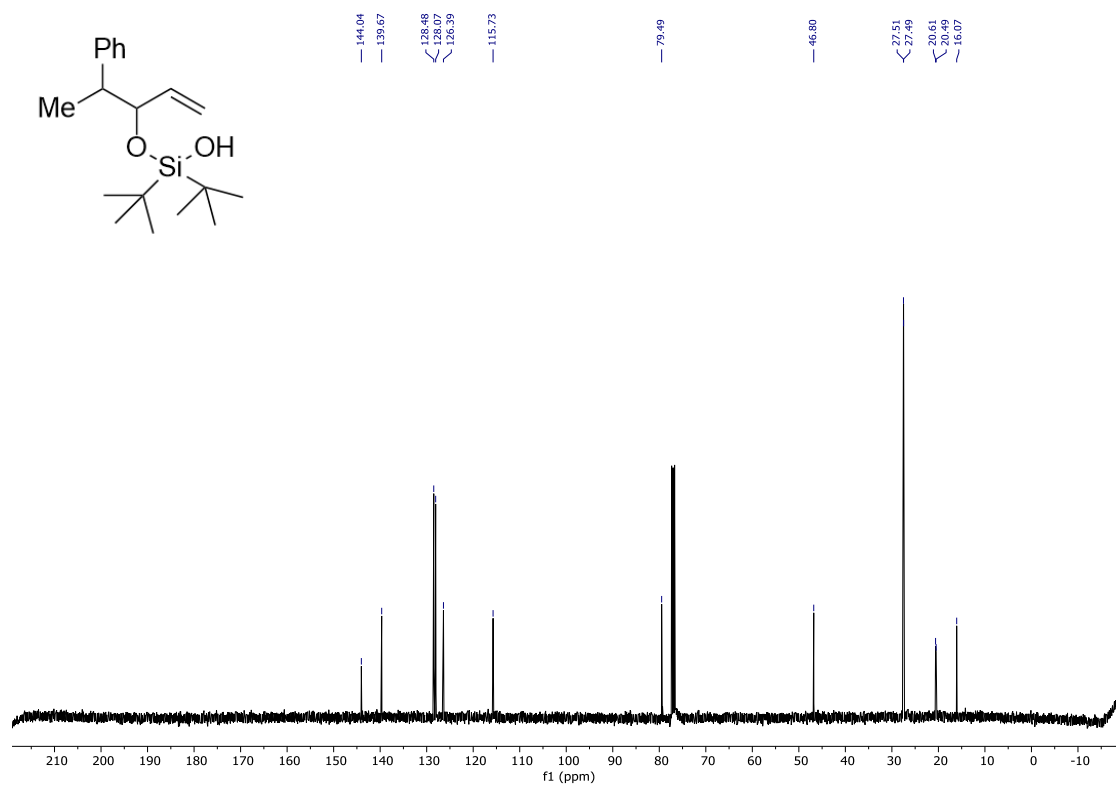

**Compound 43 ( $^1\text{H}$  NMR: 400 MHz,  $^{13}\text{C}$  NMR: 100 MHz)**

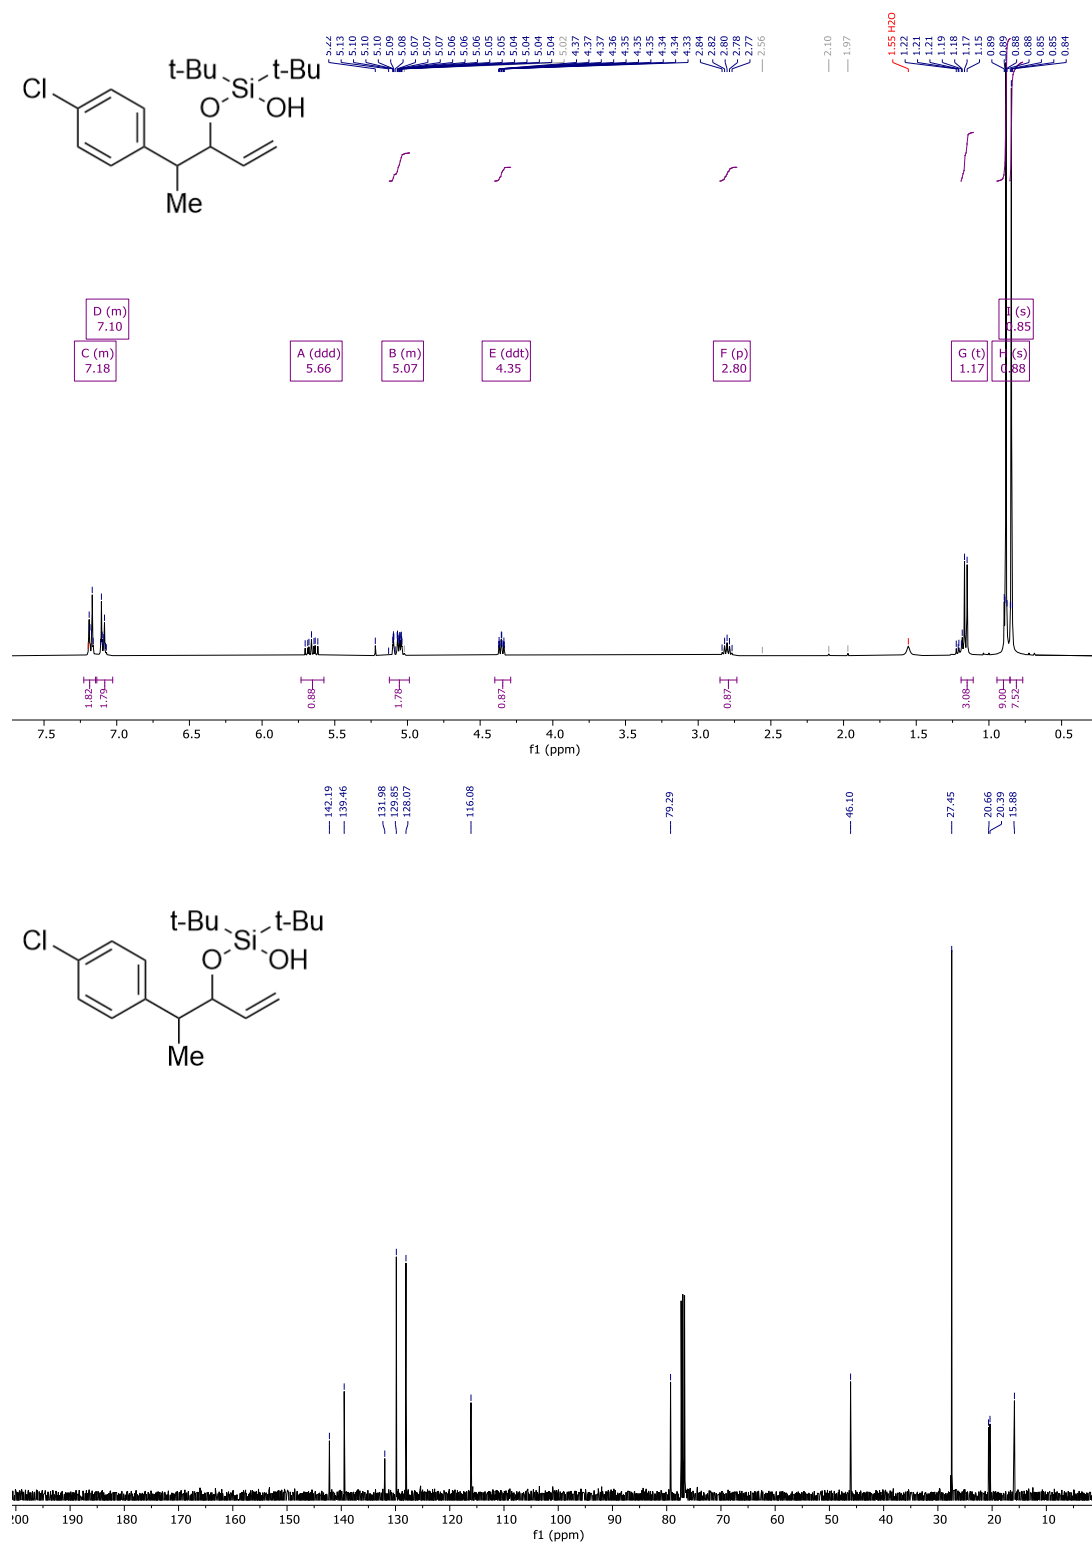

# Compound 44 (<sup>1</sup>H NMR: 400 MHz, <sup>13</sup>C NMR: 100 MHz)

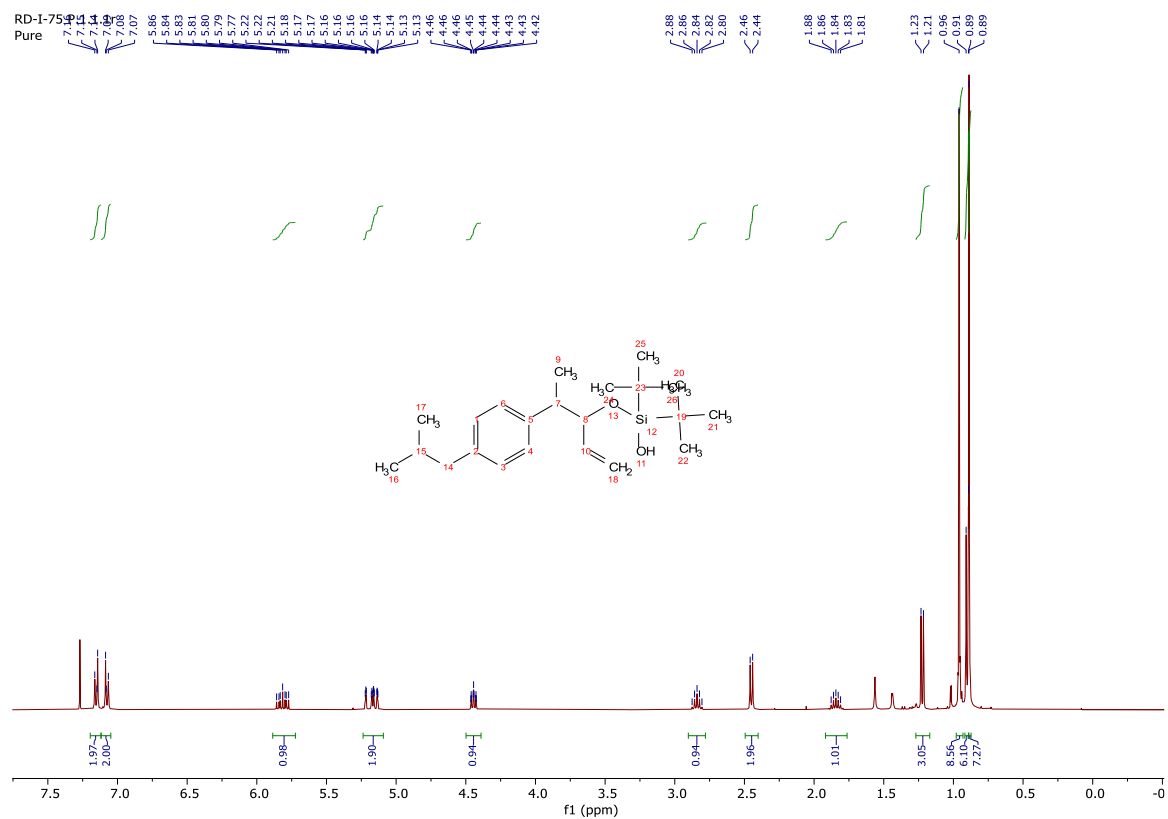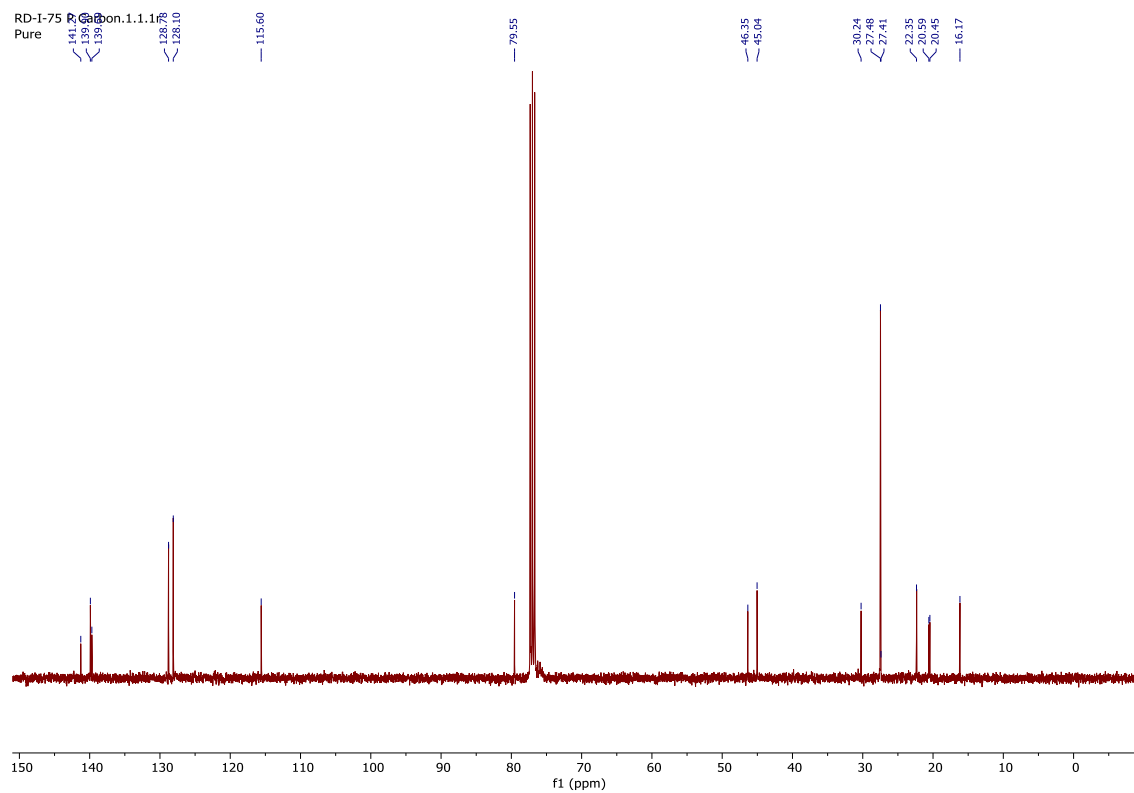

**Compound 45 (<sup>1</sup>H NMR: 400 MHz, <sup>13</sup>C NMR: 100 MHz)**

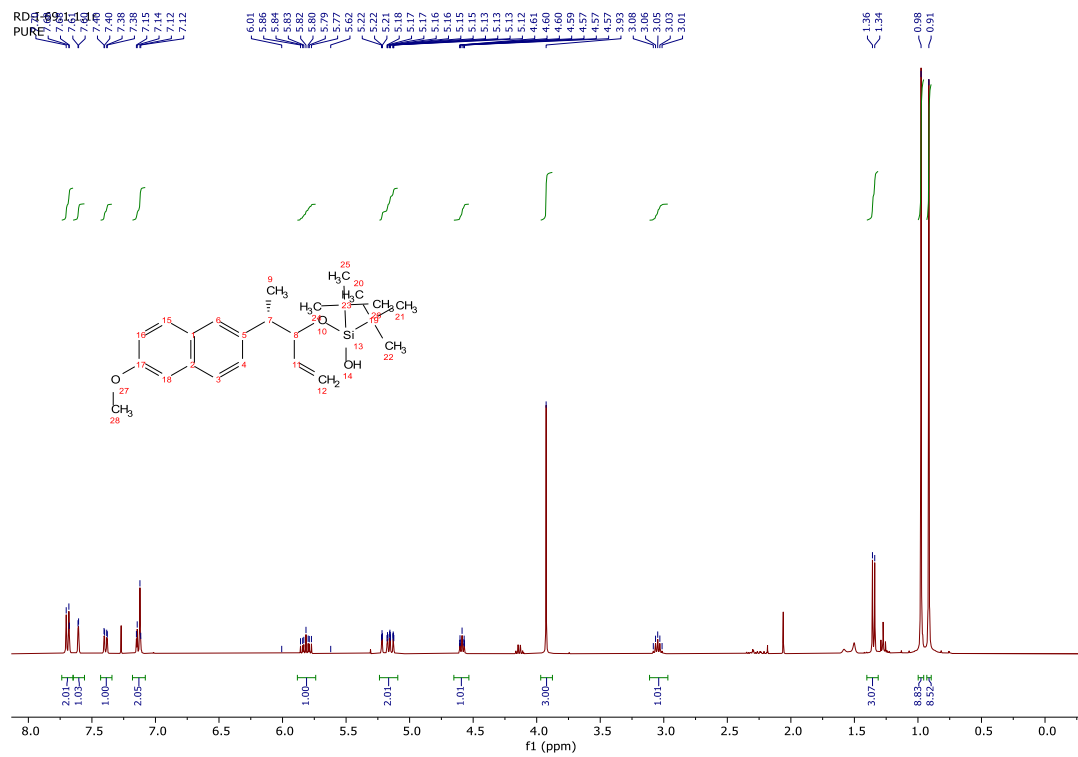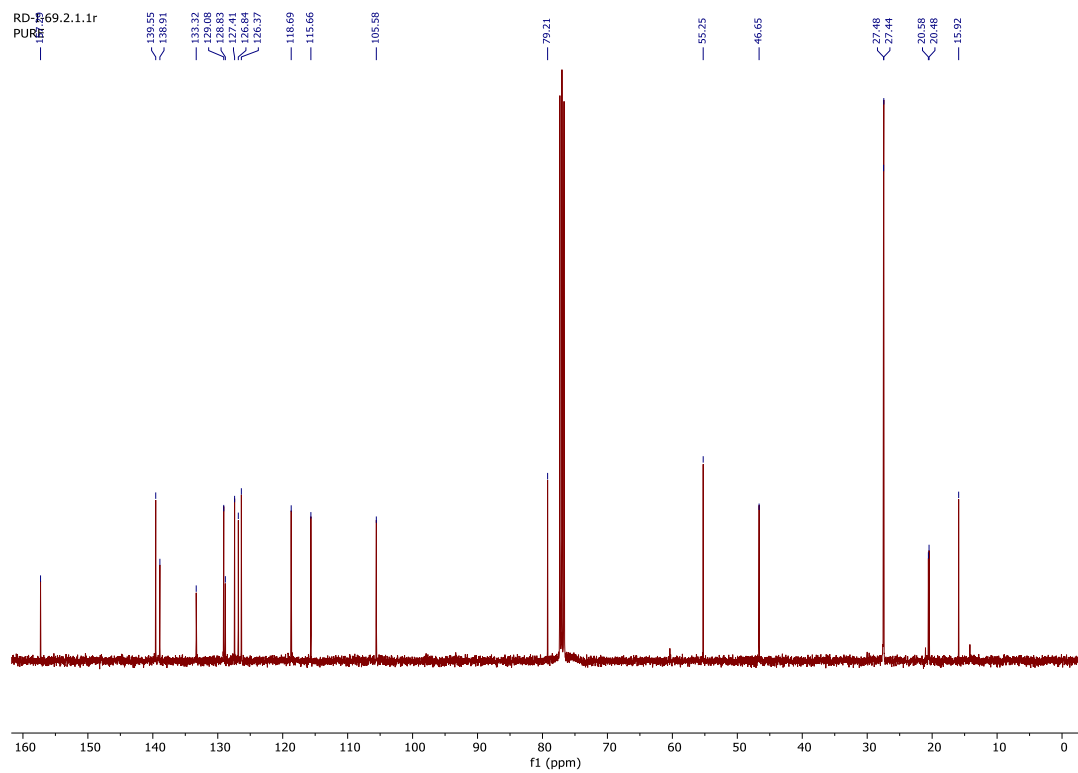



# Compound 46 (<sup>1</sup>H NMR: 400 MHz, <sup>13</sup>C NMR: 100 MHz)

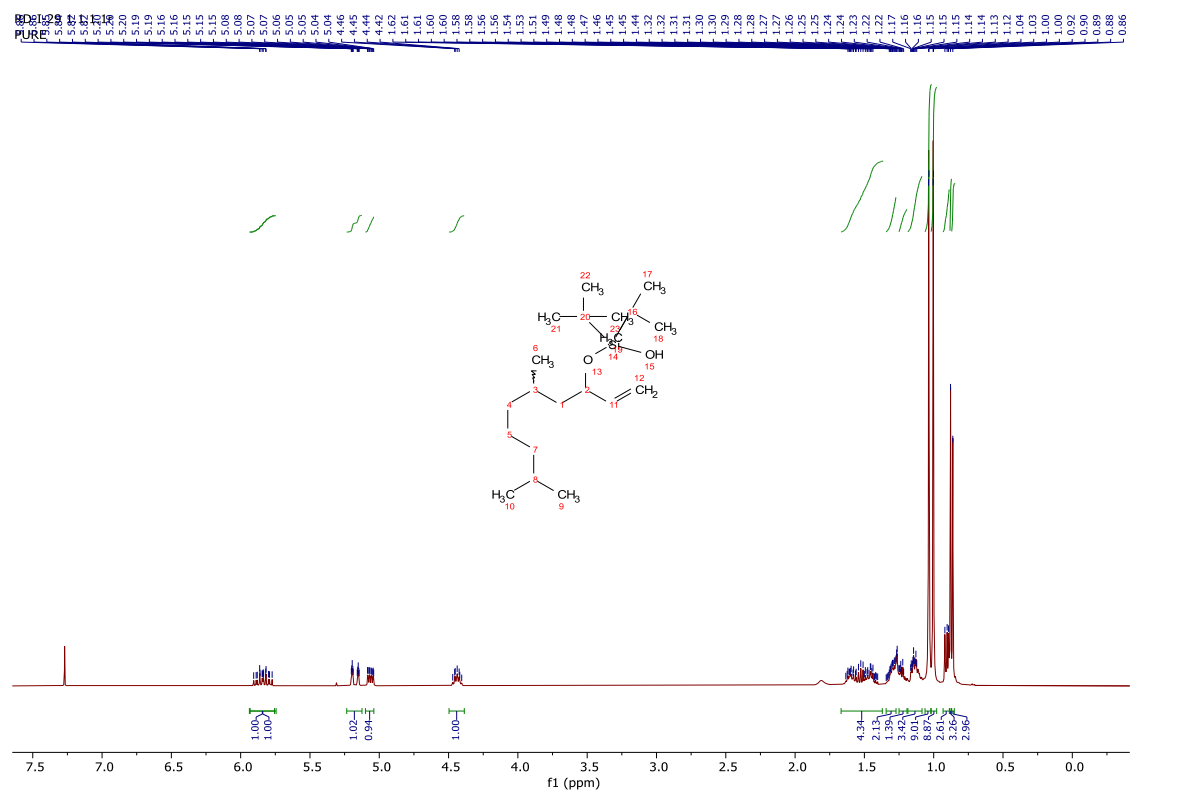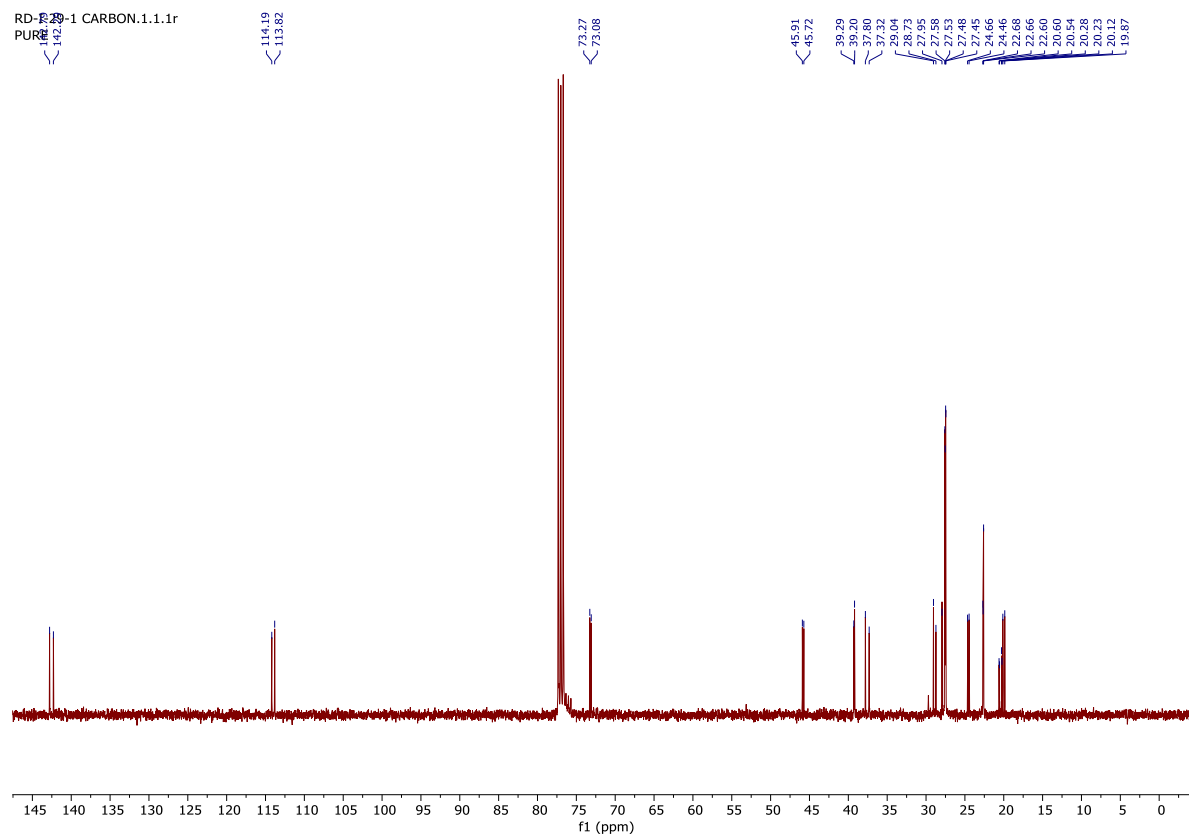

Chemical structure of compound 10b is shown above the spectrum. The structure is a complex molecule with a central carbon atom bonded to a methyl group, a hydroxyl group, and two other groups. The methyl group is labeled with a red '1'. The hydroxyl group is labeled with a red '2'. The other two groups are labeled with red '3' and '4'. The spectrum shows peaks at 7.2 (s, 1H), 5.5 (m, 2H), 4.4 (s, 1H), 3.8 (s, 1H), 2.1 (m, 2H), 1.6 (m, 2H), 1.2 (m, 2H), 1.0 (m, 2H), and 0.8 (m, 2H). Integration values are shown below the peaks: 1.00, 2.00, 1.04, 1.11, 1.21, 2.01, 2.90, 3.18, 17.88, and 9.90.

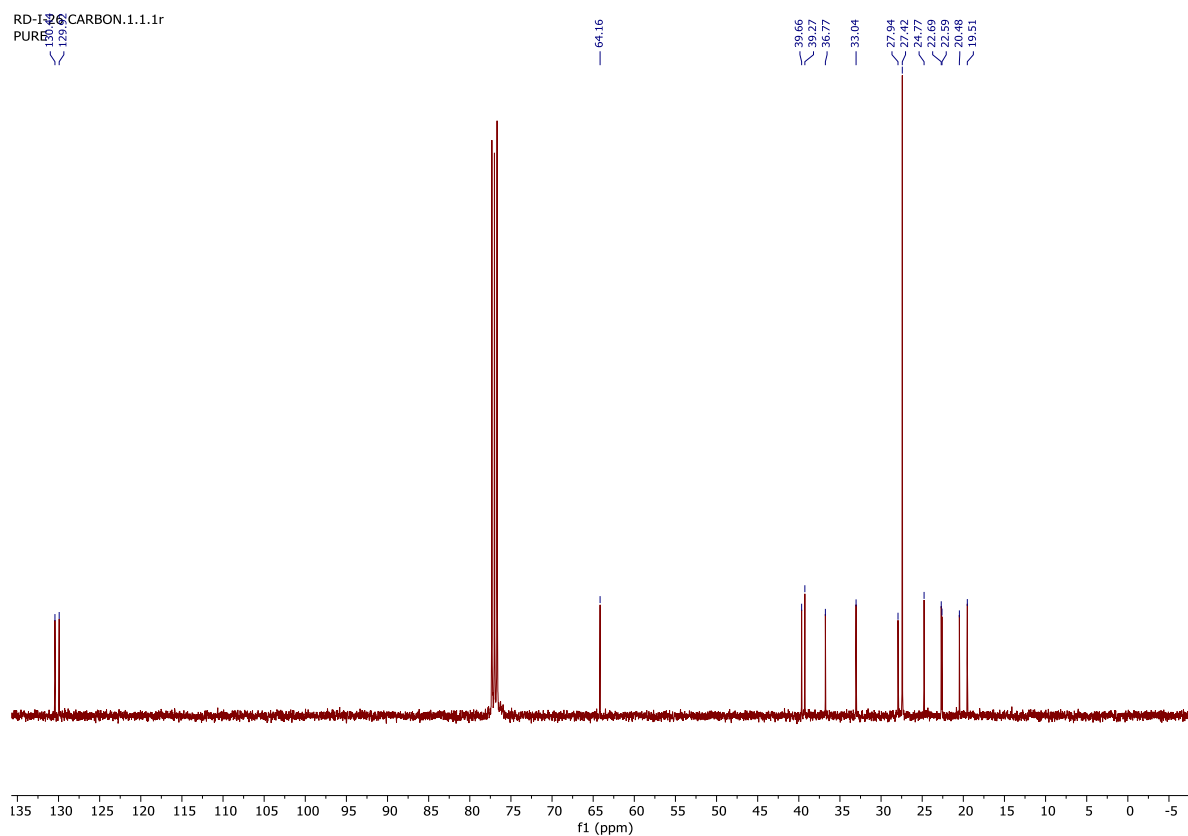

**Compound 47 ( $^1\text{H}$  NMR: 400 MHz,  $^{13}\text{C}$  NMR: 100 MHz)**

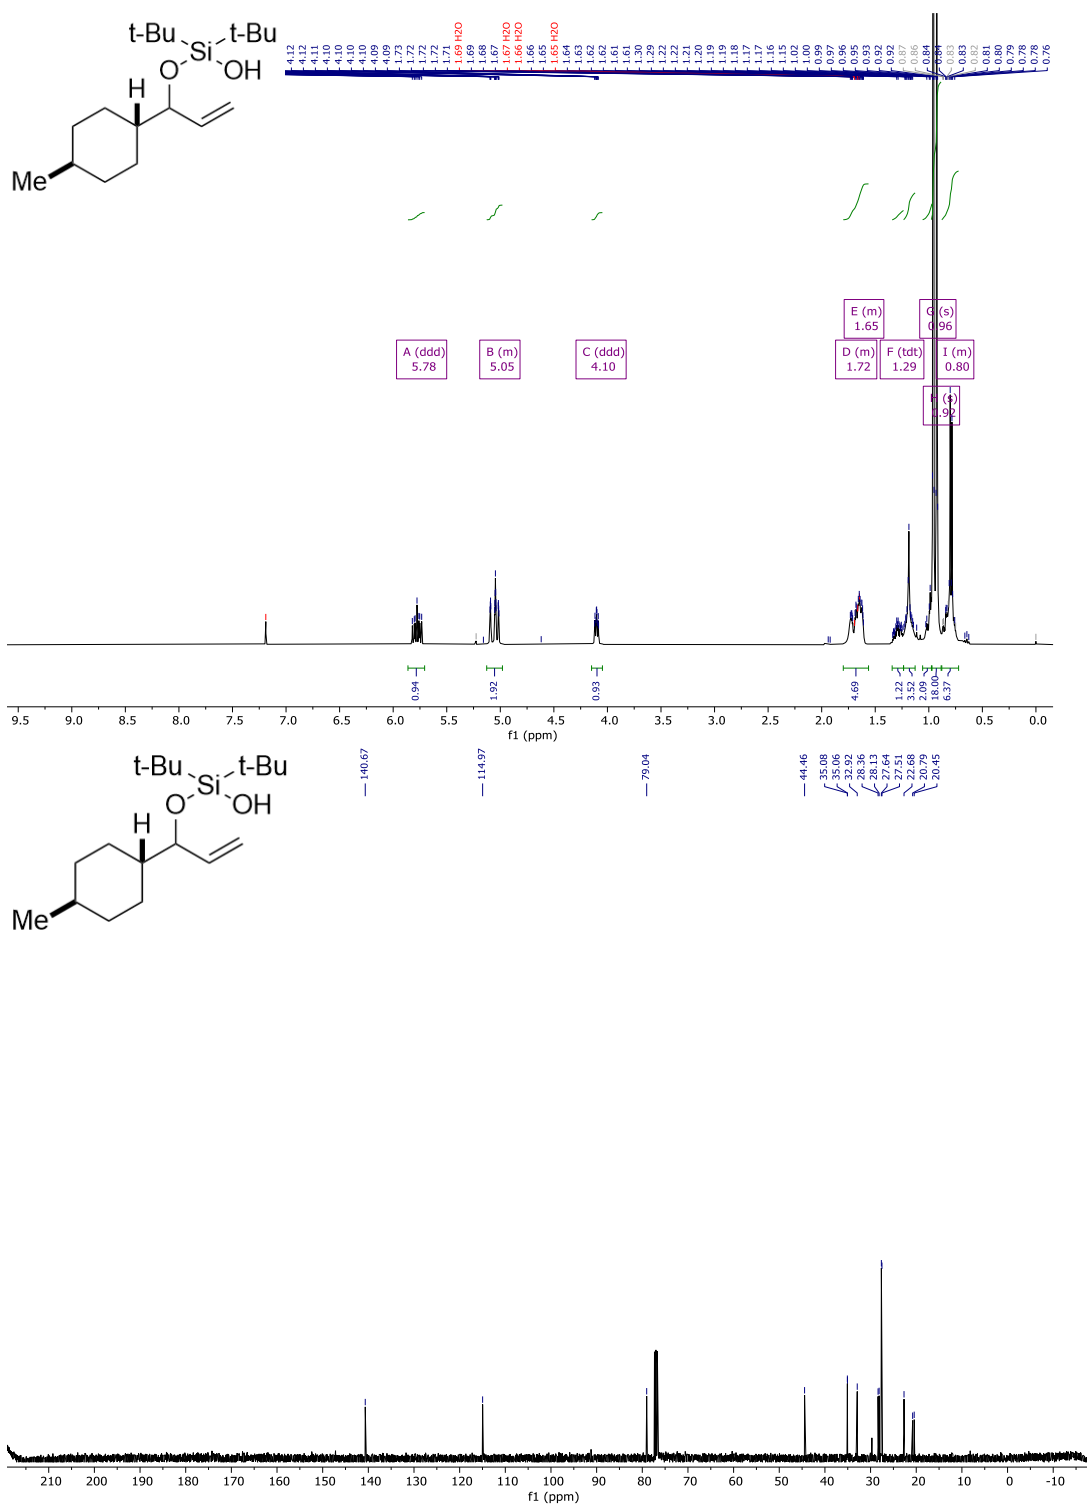

Chemical structure: CC1=CC[C@H](C1)OSi(C)(C)C(C)(C)C

<sup>1</sup>H NMR spectrum (400 MHz, CDCl<sub>3</sub>) data:

| Peak Label | Chemical Shift (ppm) | Multiplicity | Integration |
|------------|----------------------|--------------|-------------|
| A          | 5.65                 | ddt          | 1.00        |
| B          | 5.55                 | dtd          | 1.00        |
| C          | 4.31                 | dt           | 1.95        |
| D          | 1.90                 | m            | 4.45        |
| E          | 1.73                 | m            | 2.11        |
| F          | 1.29                 | m            | 2.22        |
| G          | 0.90                 | d            | 25.24       |
| H          | 1.05                 | s            | 3.78        |

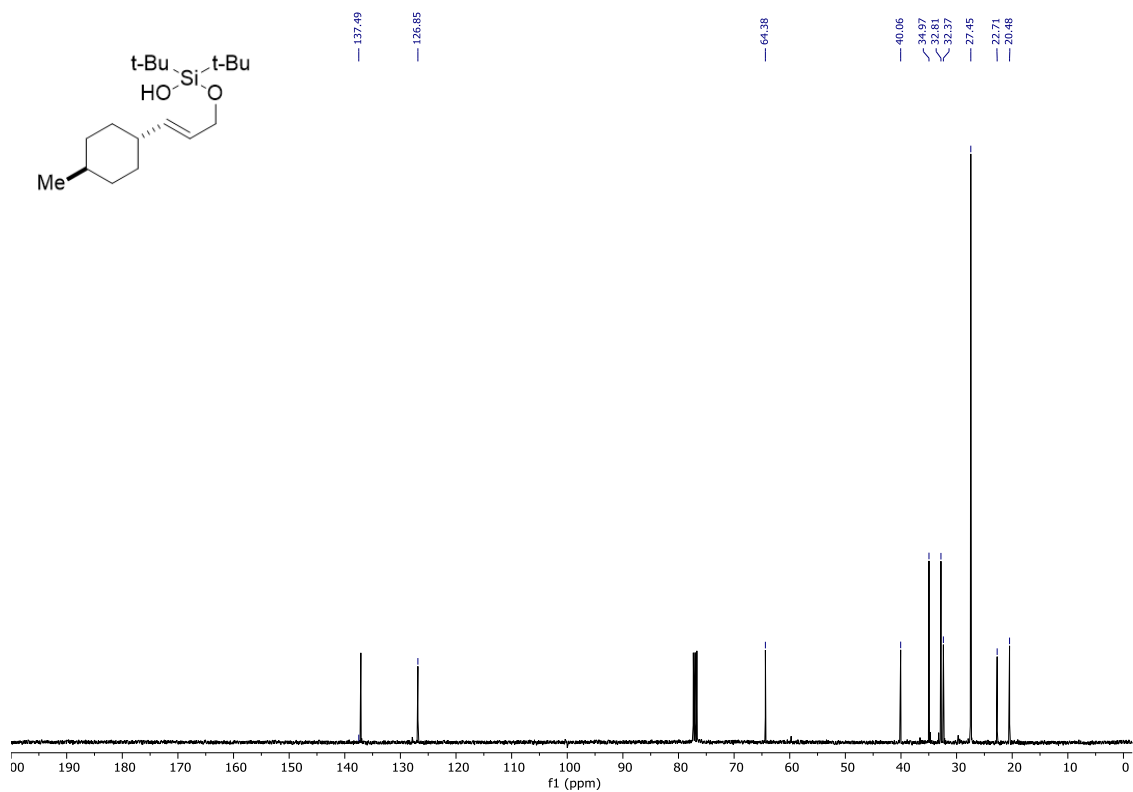

**Compound 48 ( $^1\text{H}$  NMR: 400 MHz,  $^{13}\text{C}$  NMR: 100 MHz)**

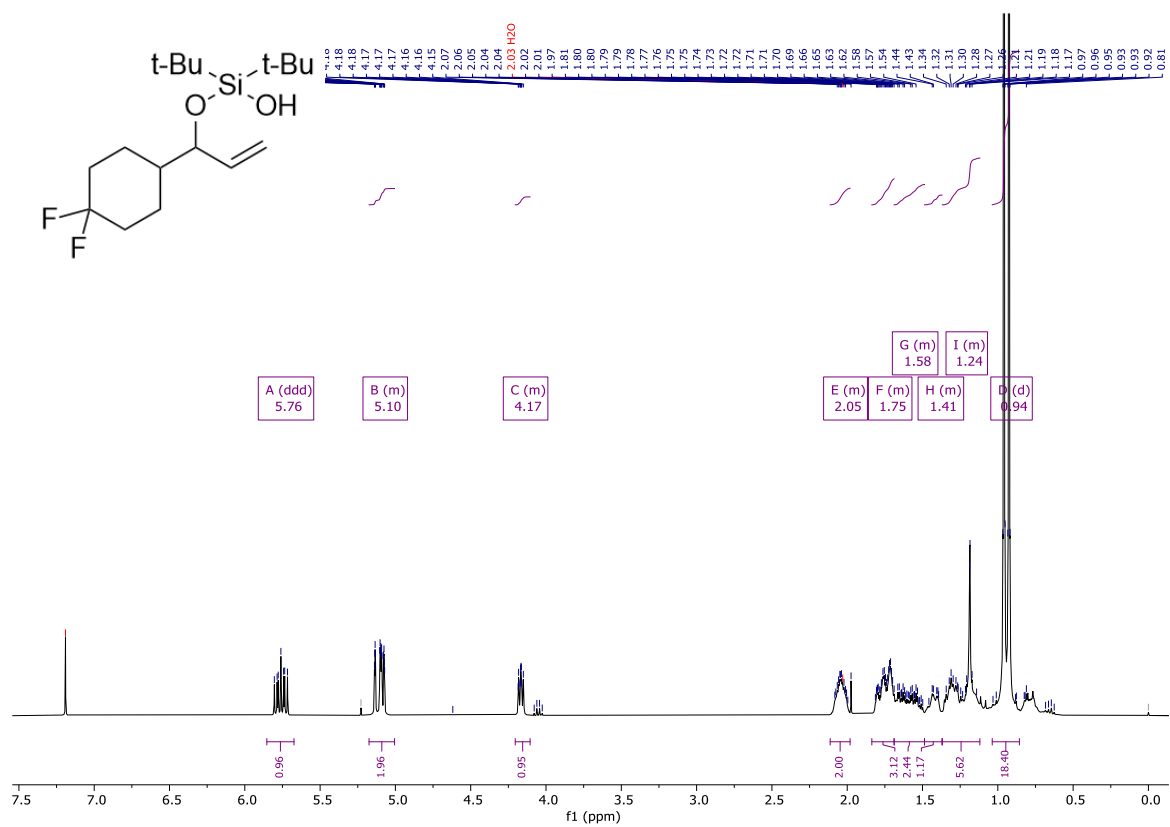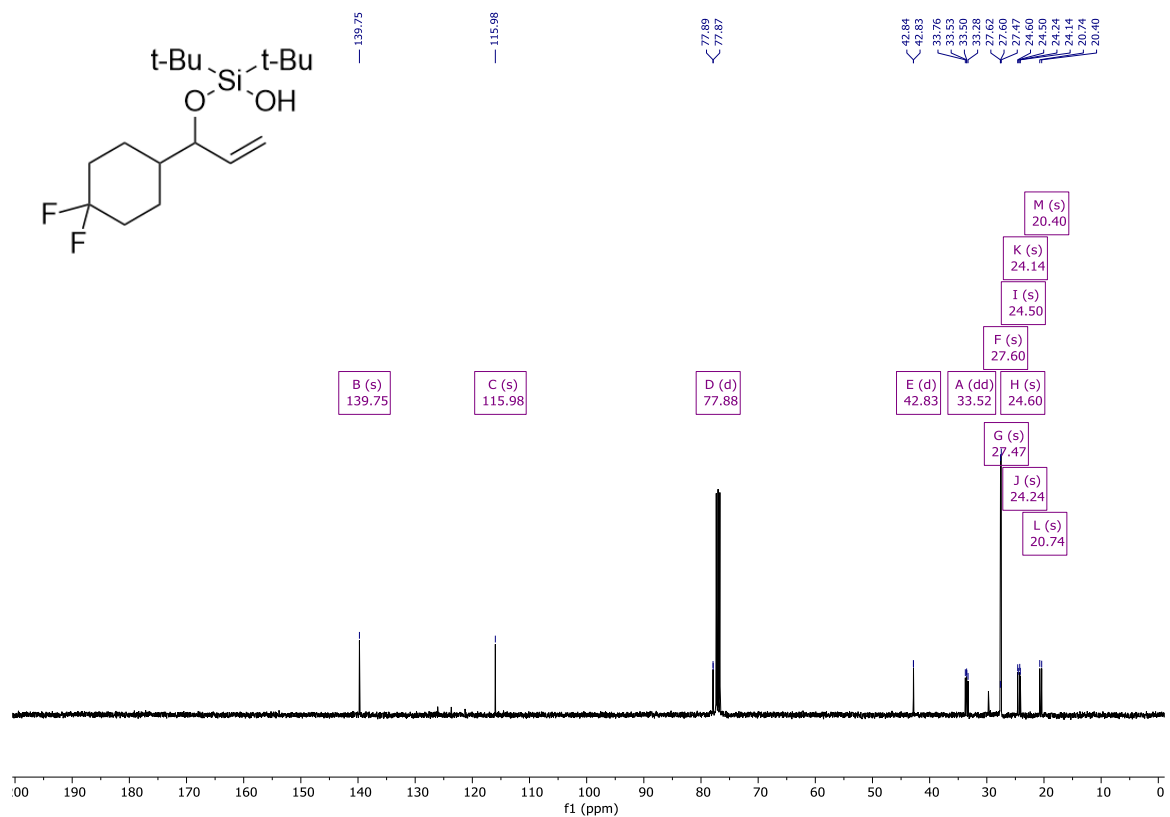

Compound 48 isomer ( $^1\text{H}$  NMR: 400 MHz,  $^{13}\text{C}$  NMR: 100 MHz)

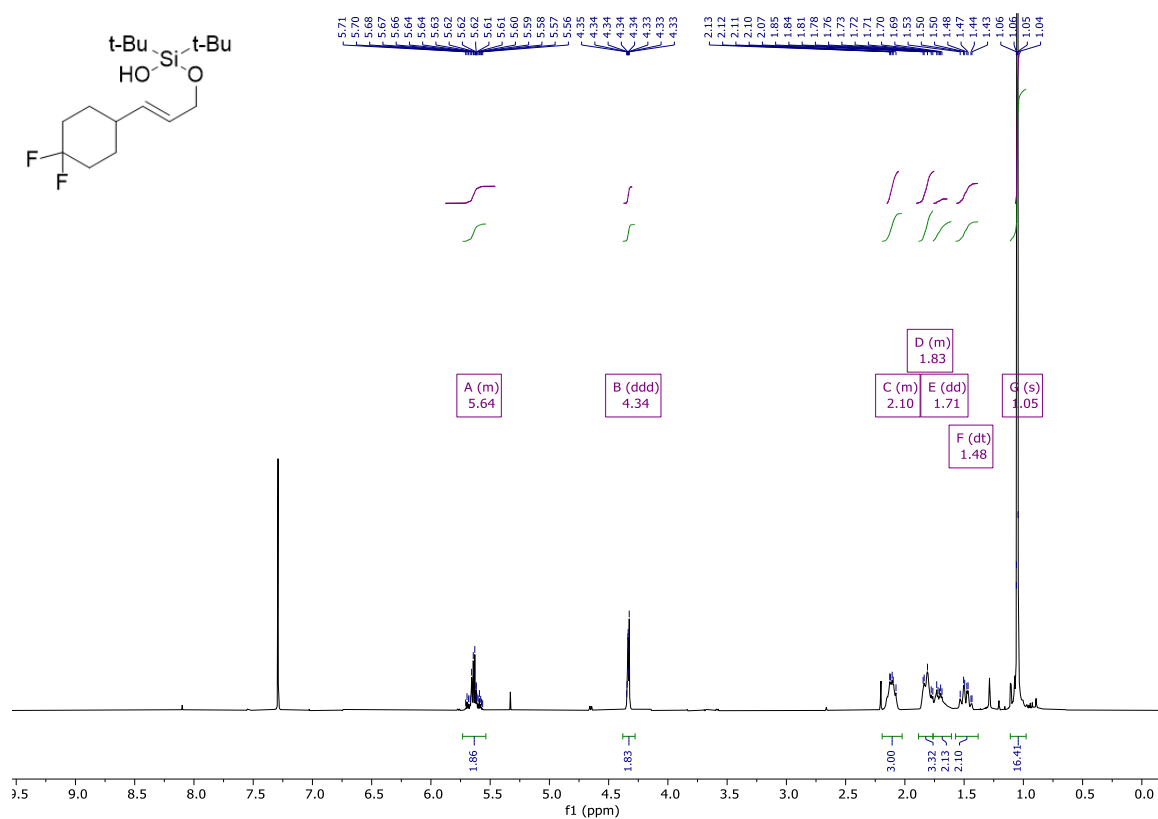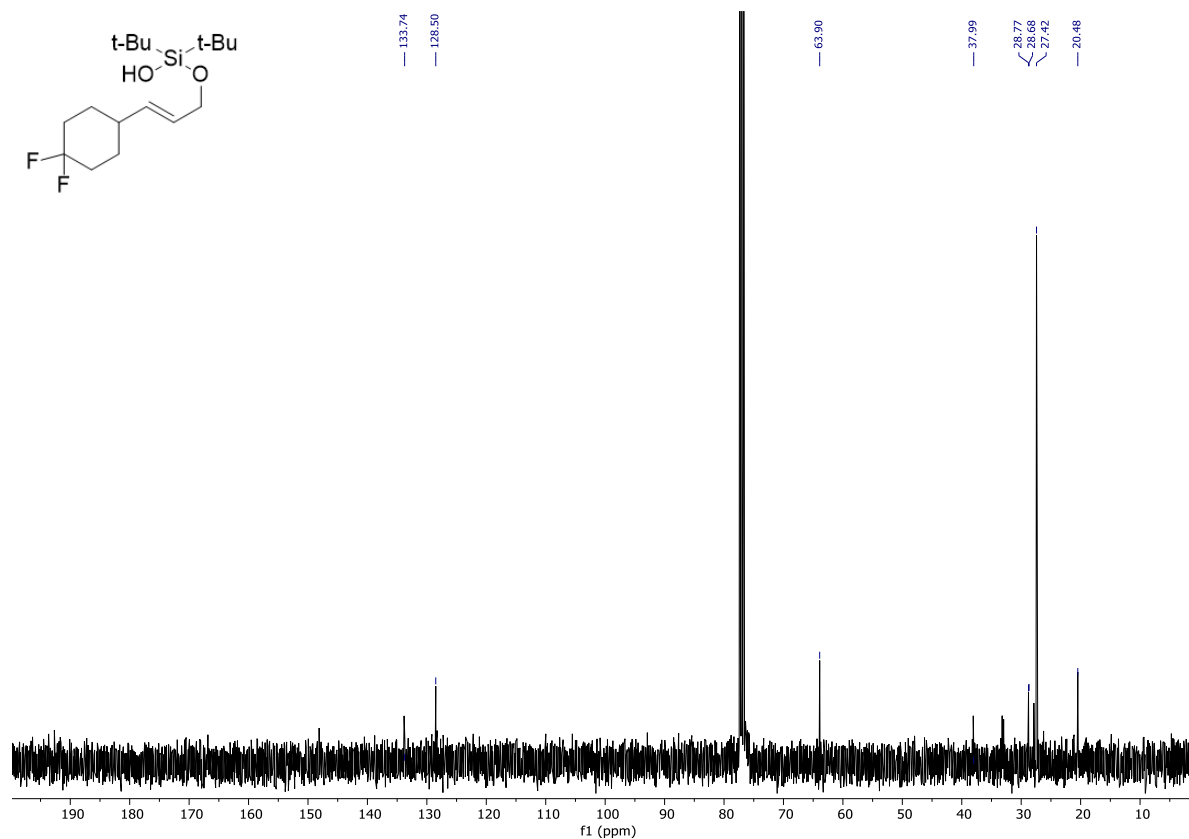

Compound 49 ( $^1\text{H}$  NMR: 400 MHz,  $^{13}\text{C}$  NMR: 100 MHz)

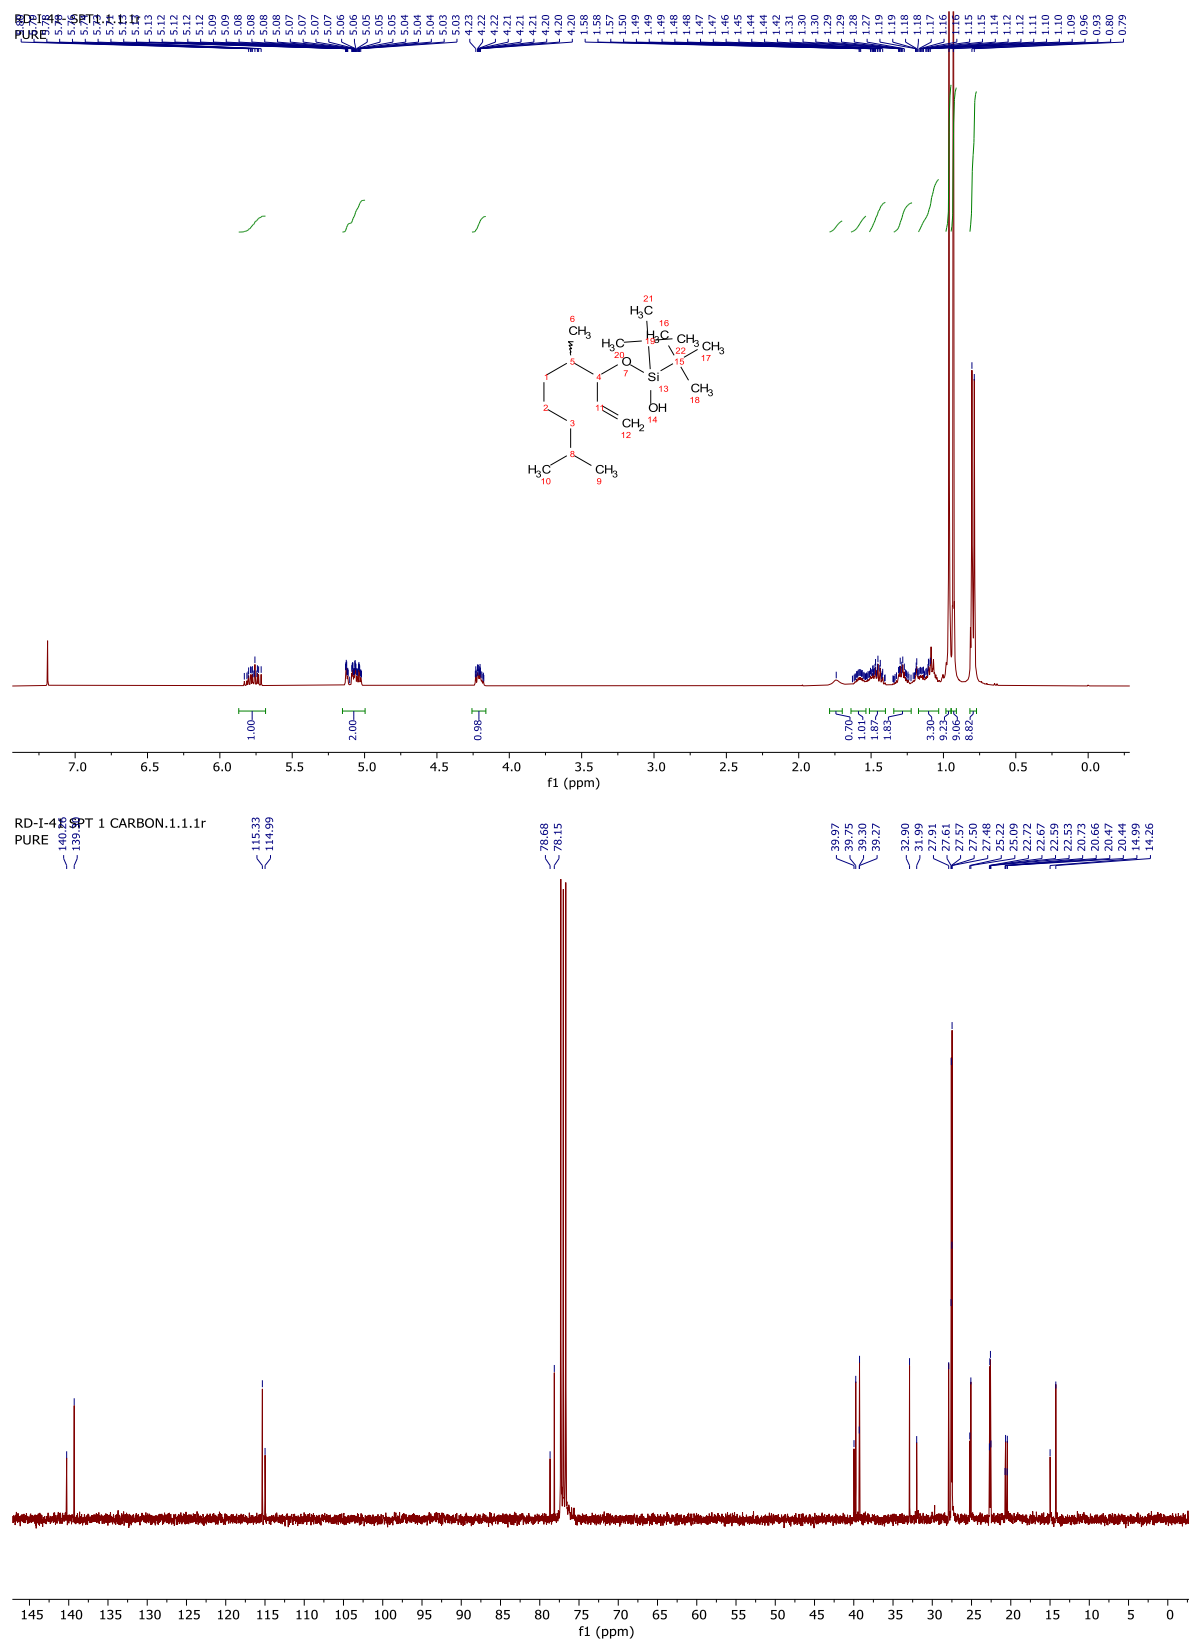

# Compound 49 isomer (<sup>1</sup>H NMR: 400 MHz, <sup>13</sup>C NMR: 100 MHz)

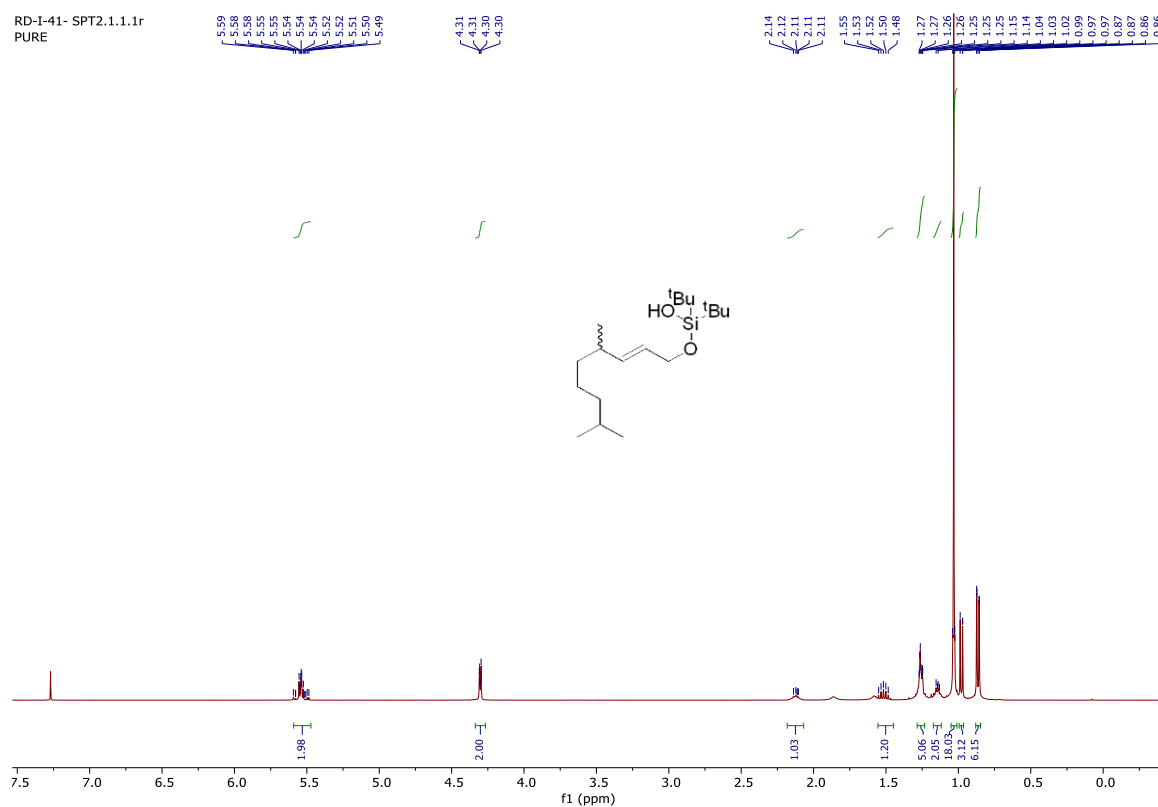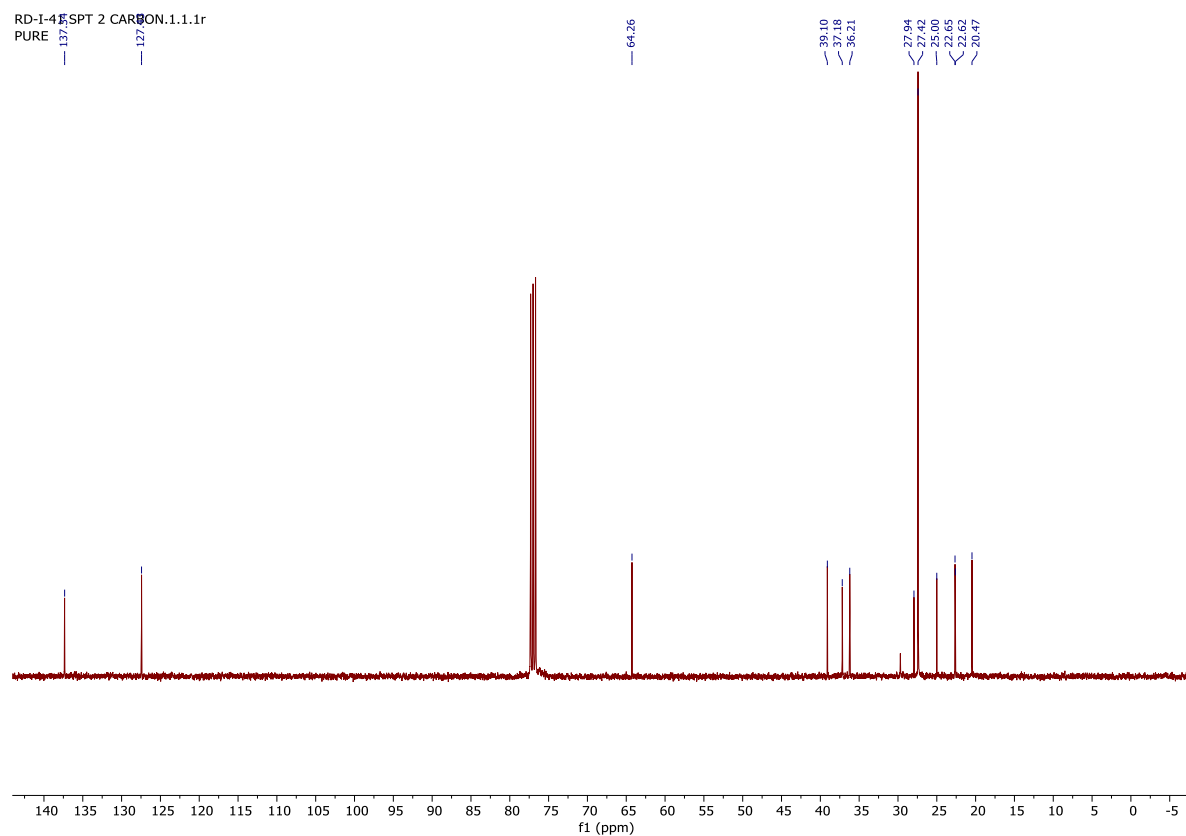



Compound 50 ( $^1\text{H}$  NMR: 400 MHz,  $^{13}\text{C}$  NMR: 100 MHz)

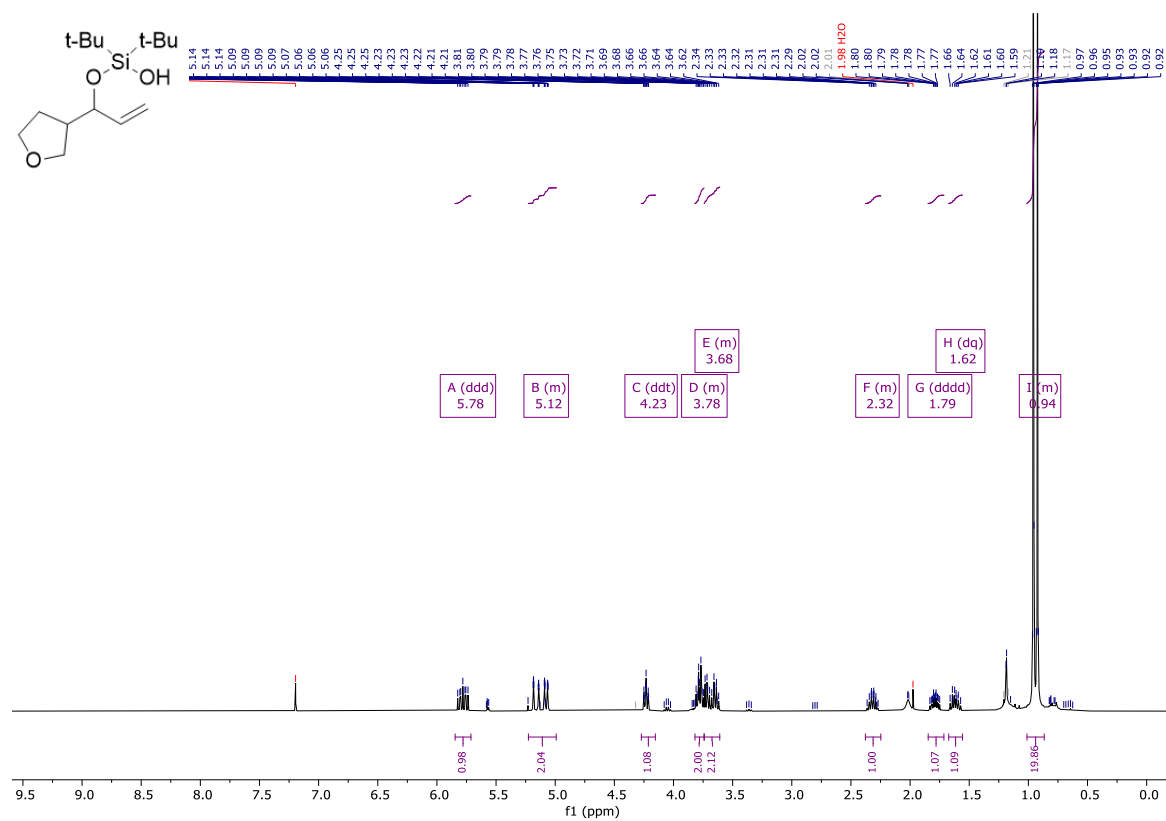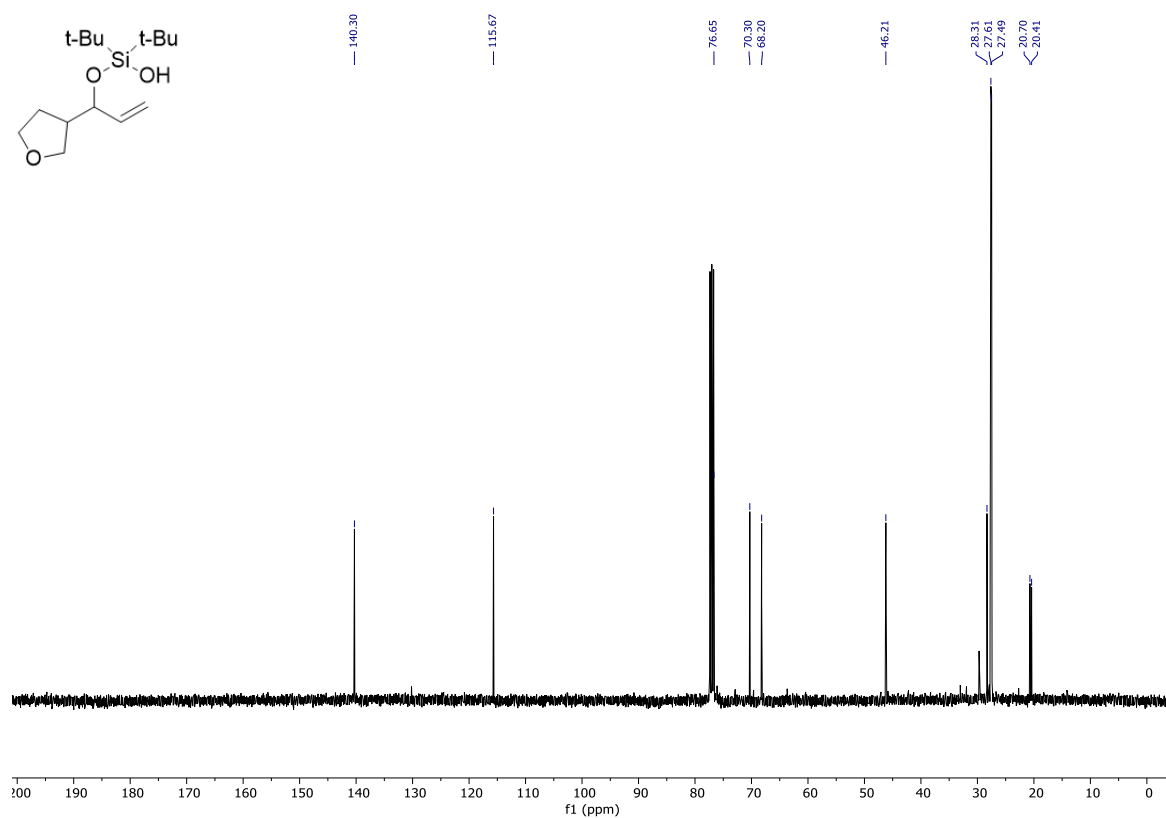

**Compound 50 isomer ( $^1\text{H}$  NMR: 400 MHz,  $^{13}\text{C}$  NMR: 100 MHz)**

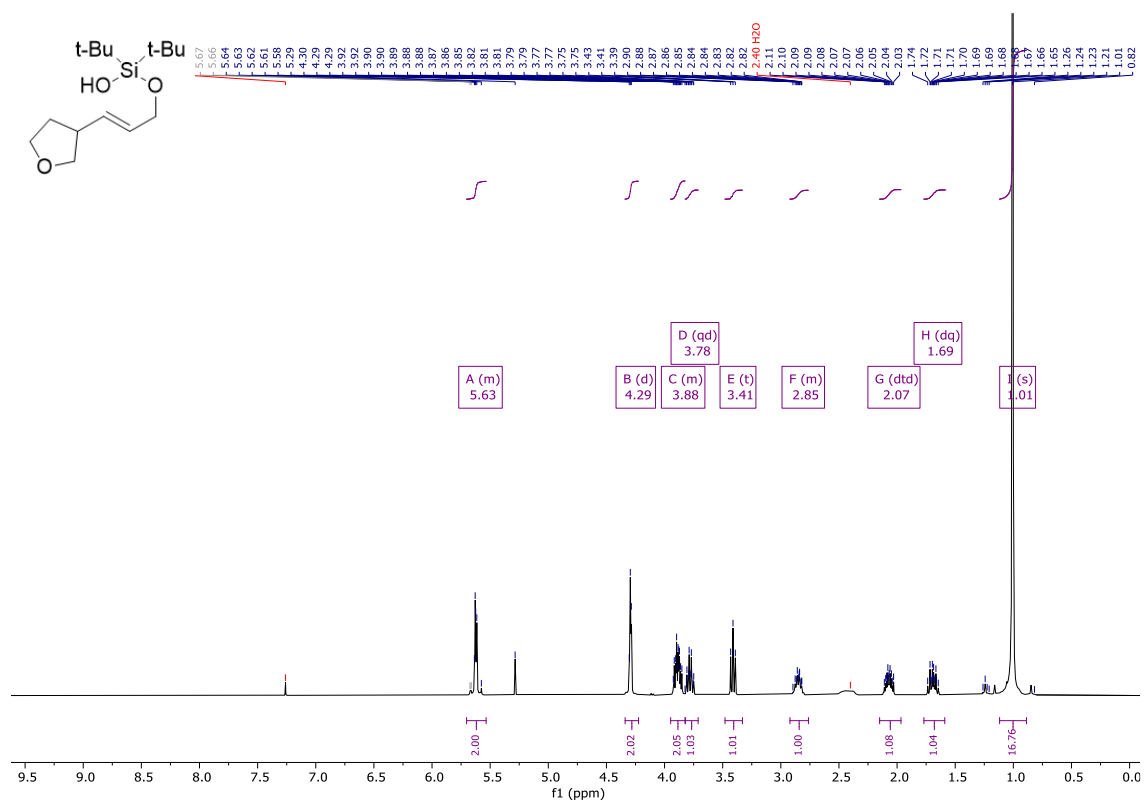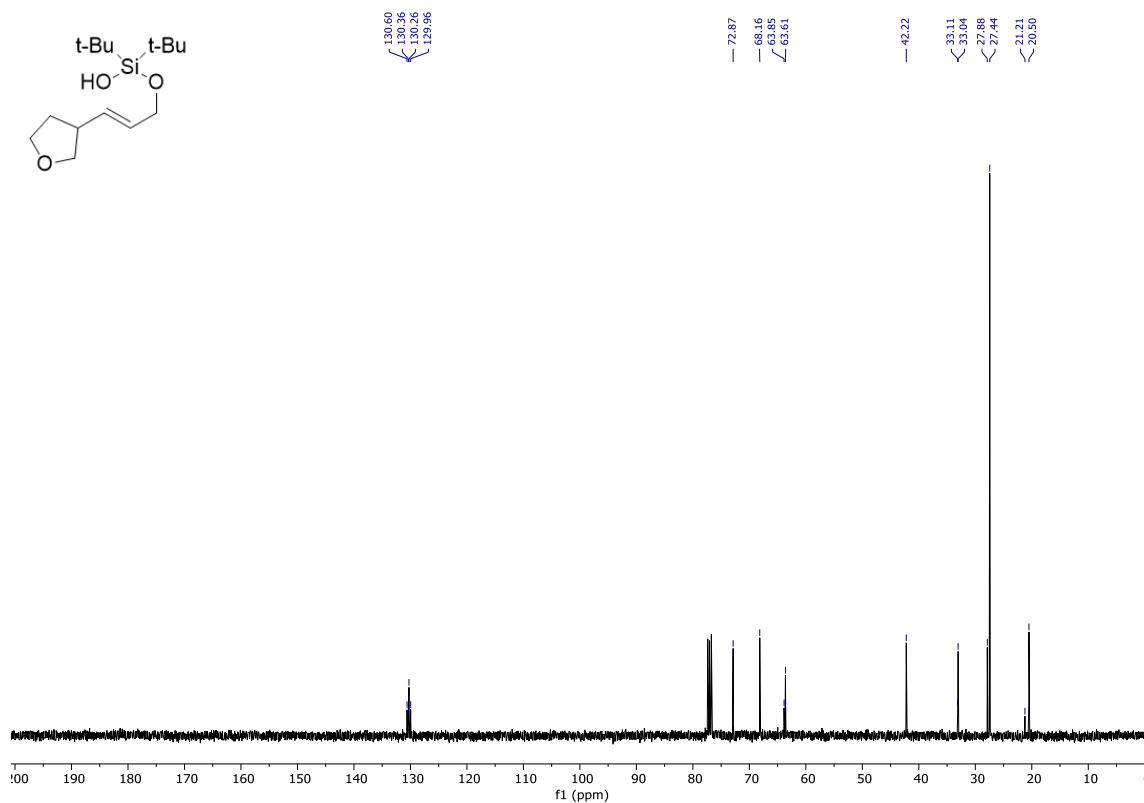

Compound 51 ( $^1\text{H}$  NMR: 400 MHz,  $^{13}\text{C}$  NMR: 100 MHz)

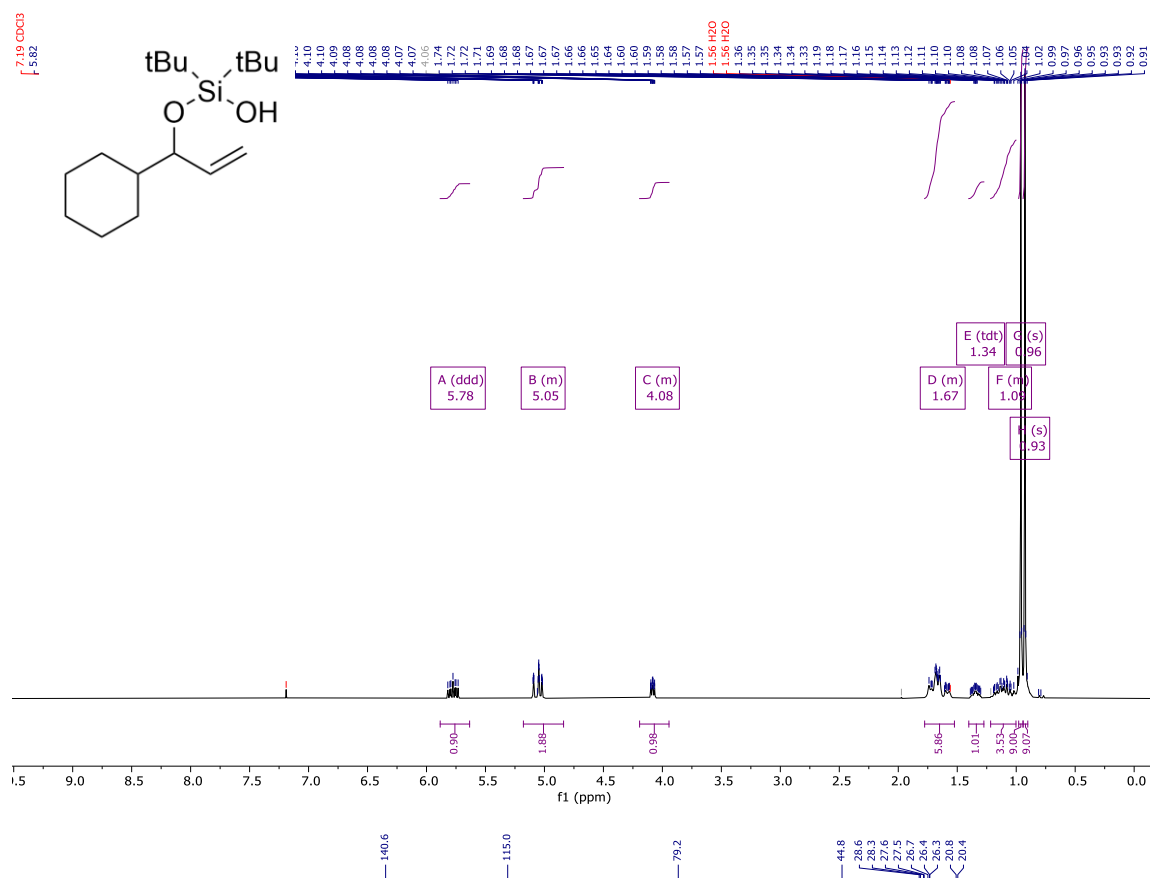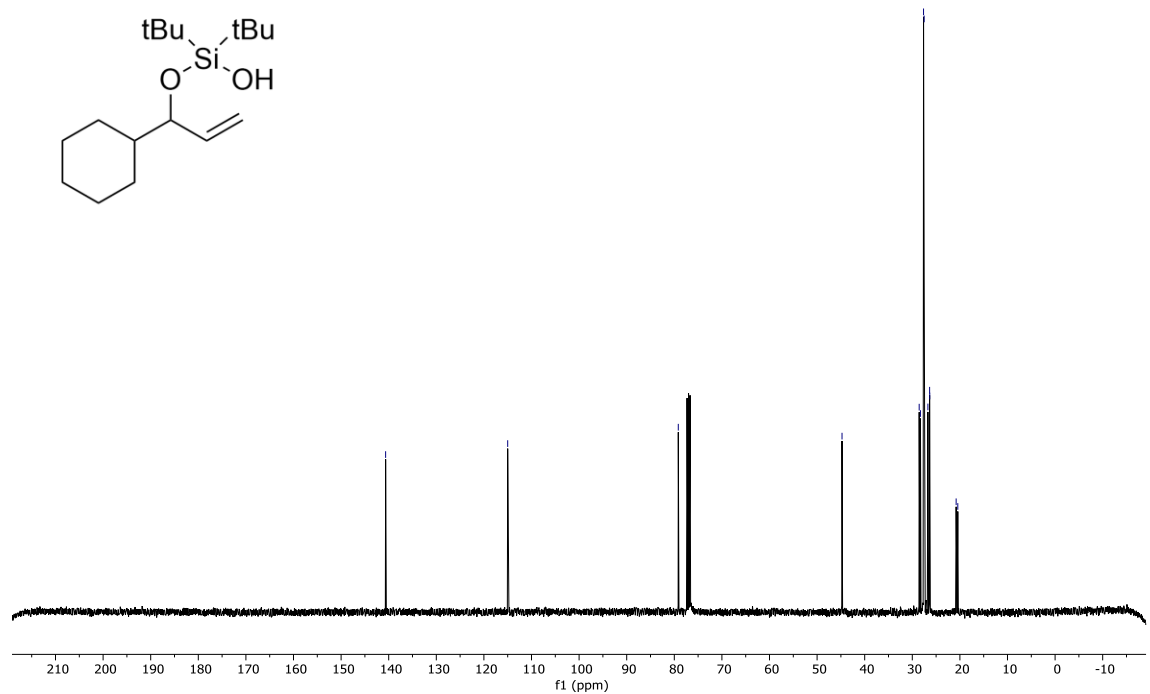

Compound 52 ( $^1\text{H}$  NMR: 400 MHz,  $^{13}\text{C}$  NMR: 100 MHz)

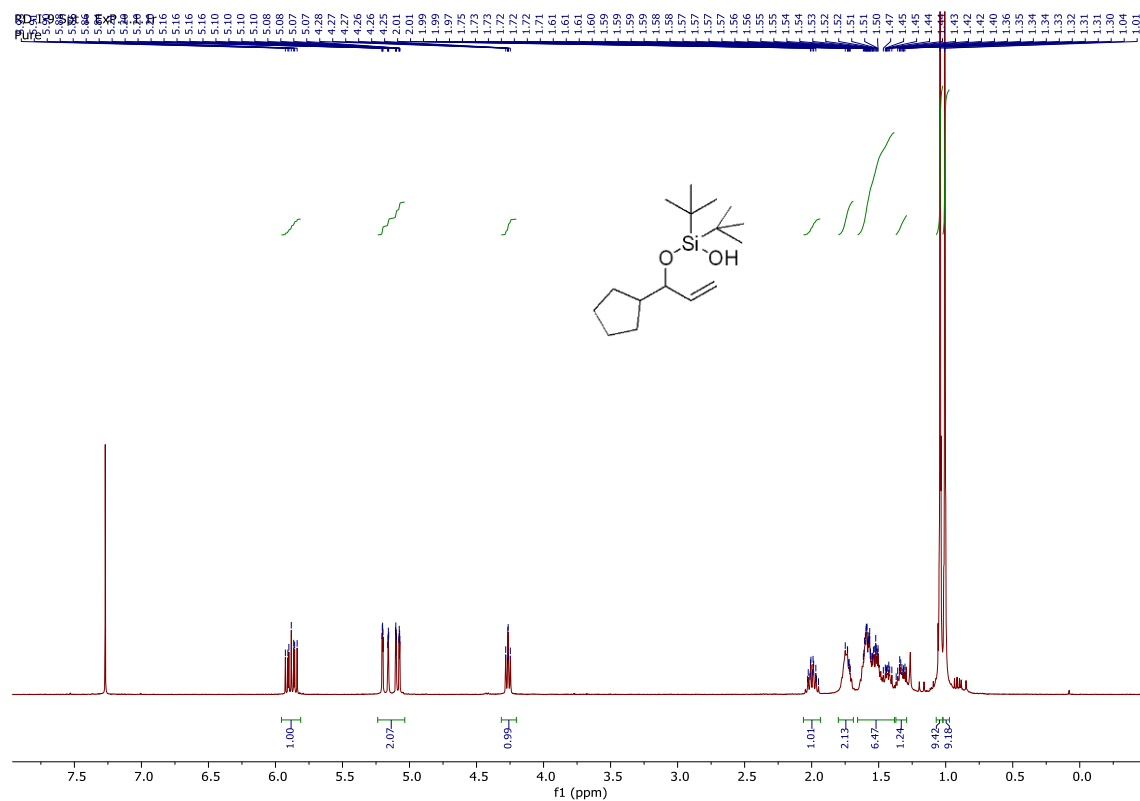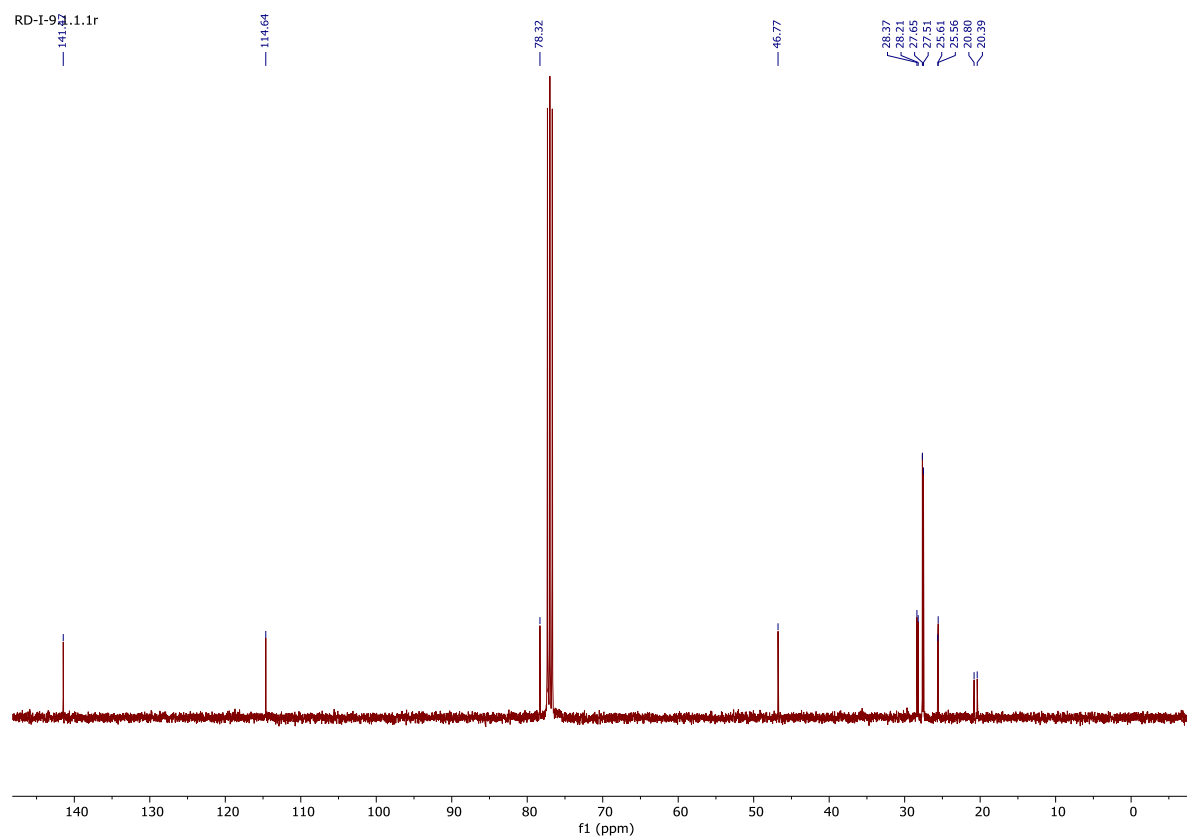

Compound 52 isomer ( $^1\text{H}$  NMR: 400 MHz,  $^{13}\text{C}$  NMR: 100 MHz)

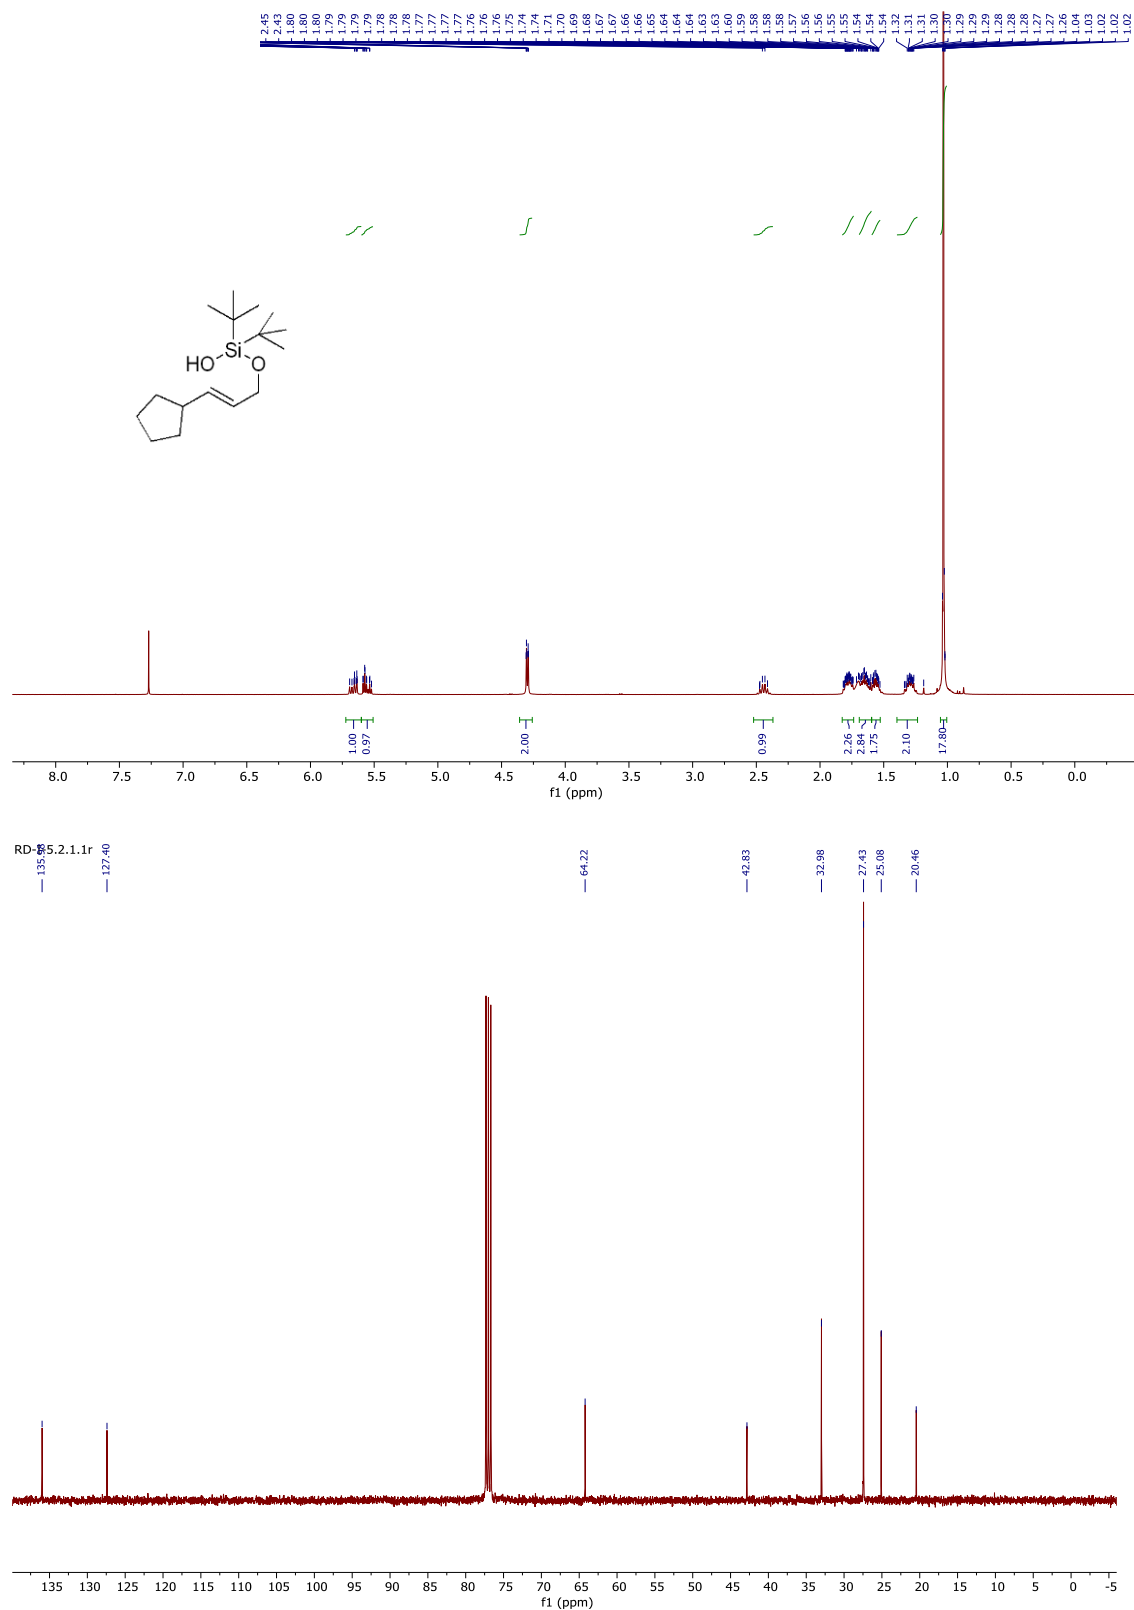

**Compound 53 ( $^1\text{H}$  NMR: 400 MHz,  $^{13}\text{C}$  NMR: 100 MHz)**

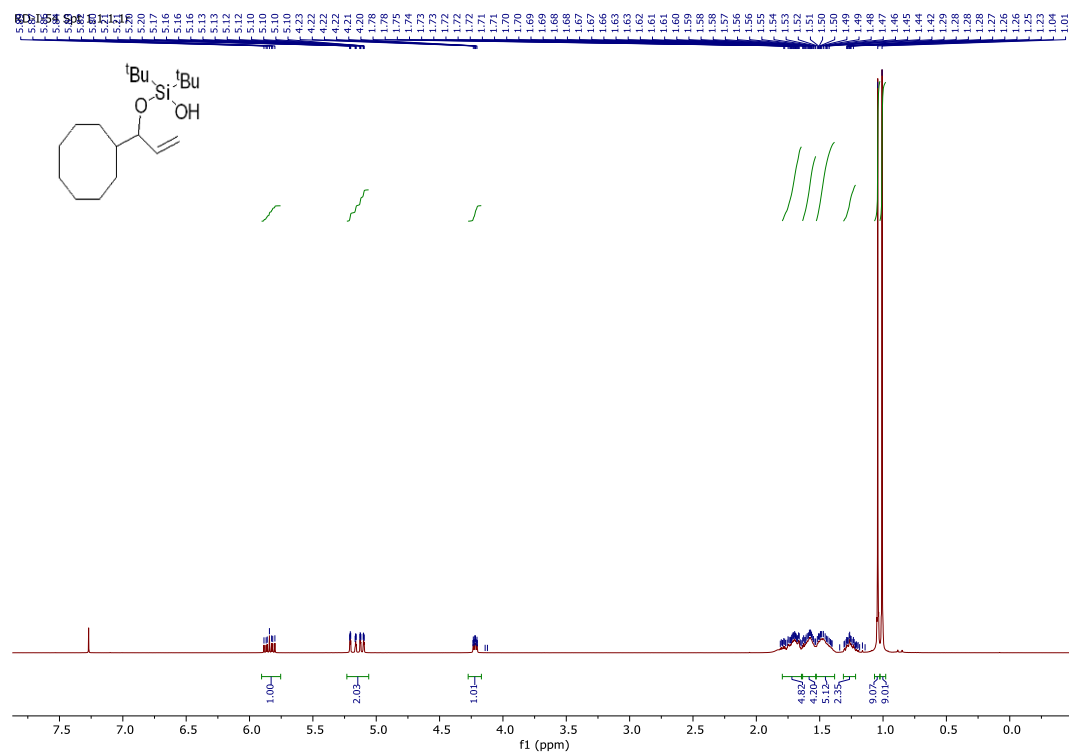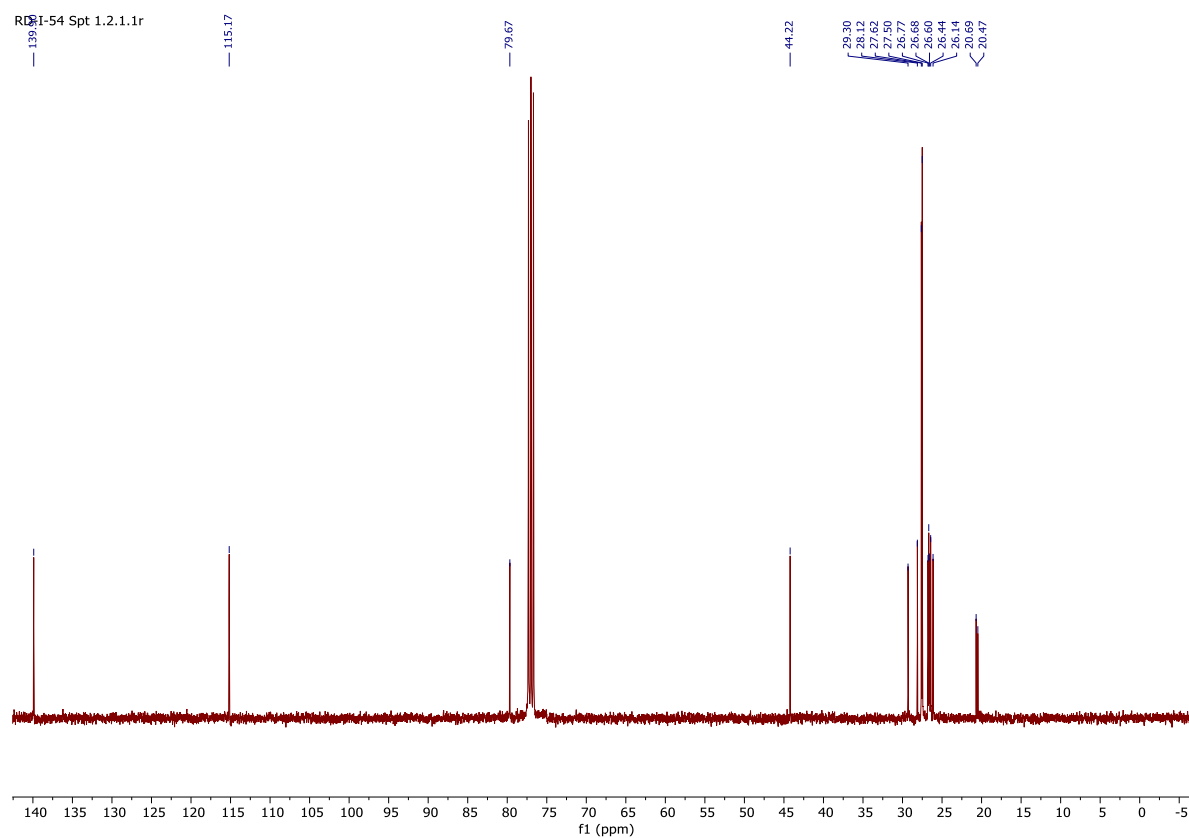

# Compound 53 isomer (<sup>1</sup>H NMR: 400 MHz, <sup>13</sup>C NMR: 100 MHz)

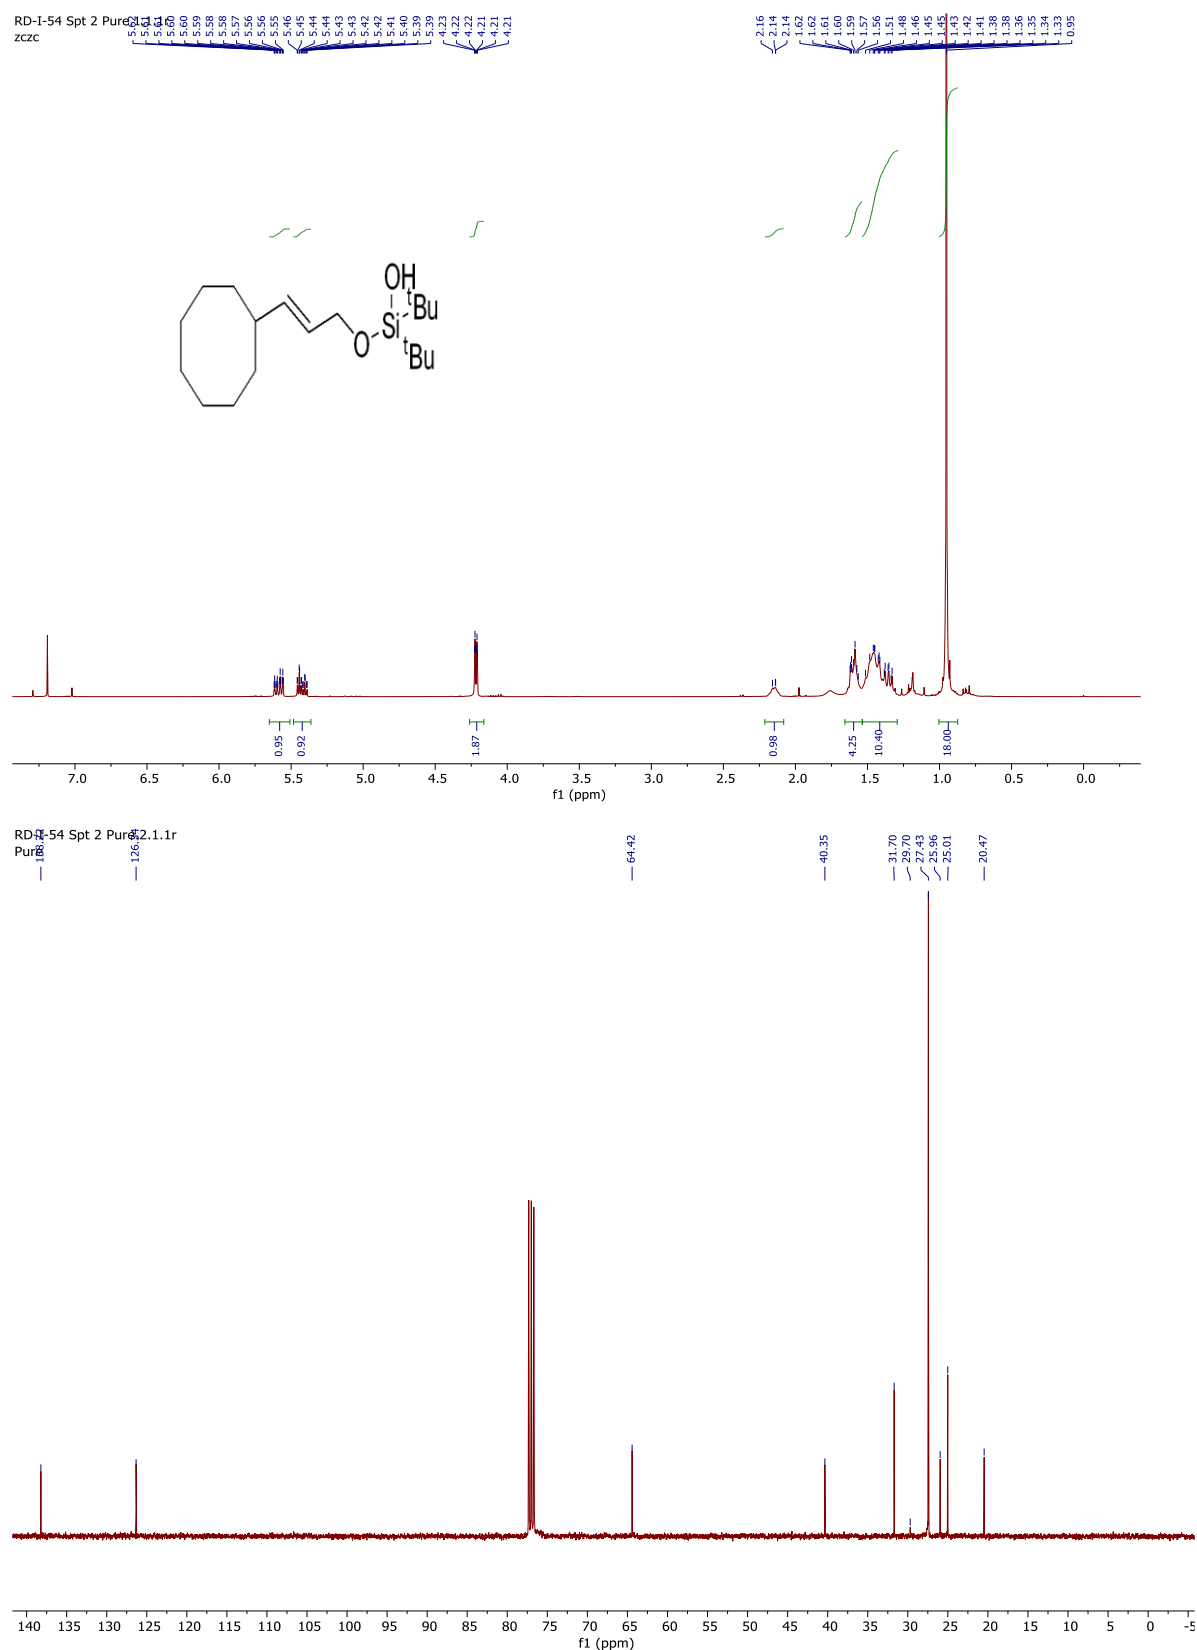

**Compound 54 ( $^1\text{H}$  NMR: 400 MHz,  $^{13}\text{C}$  NMR: 100 MHz)**

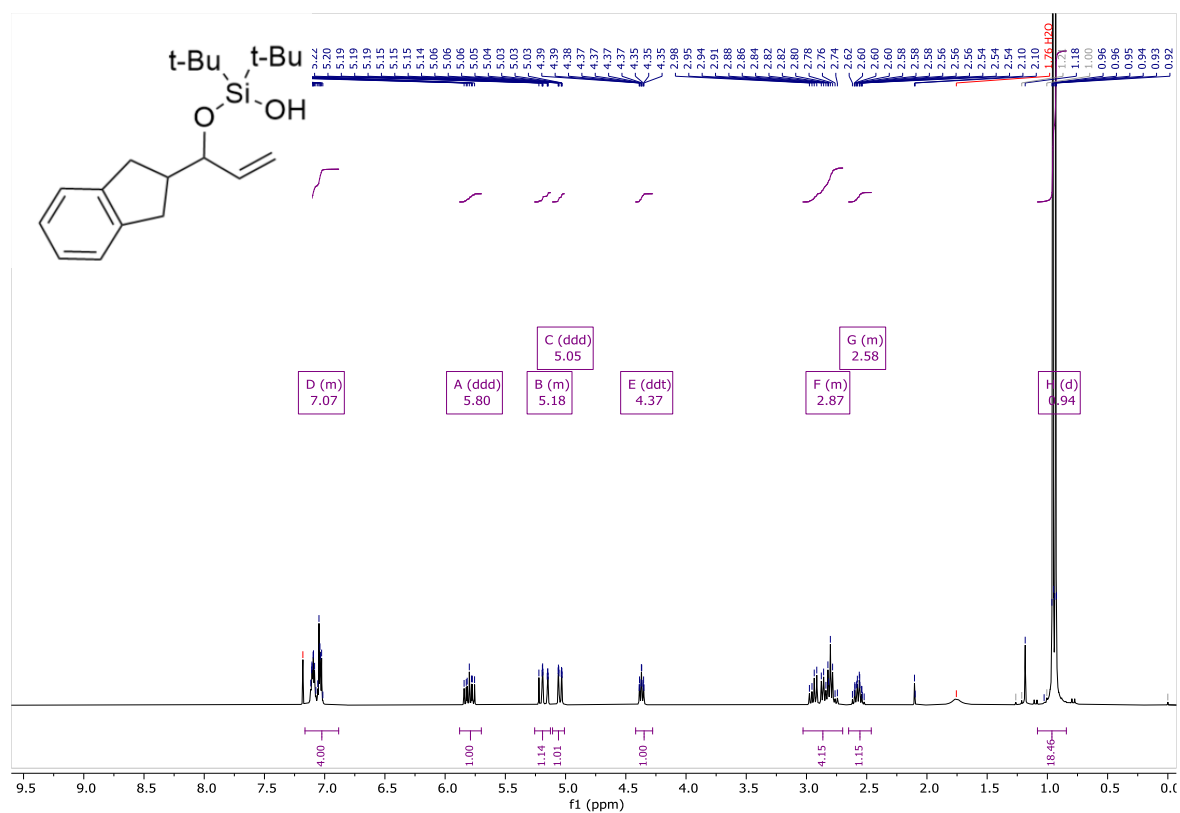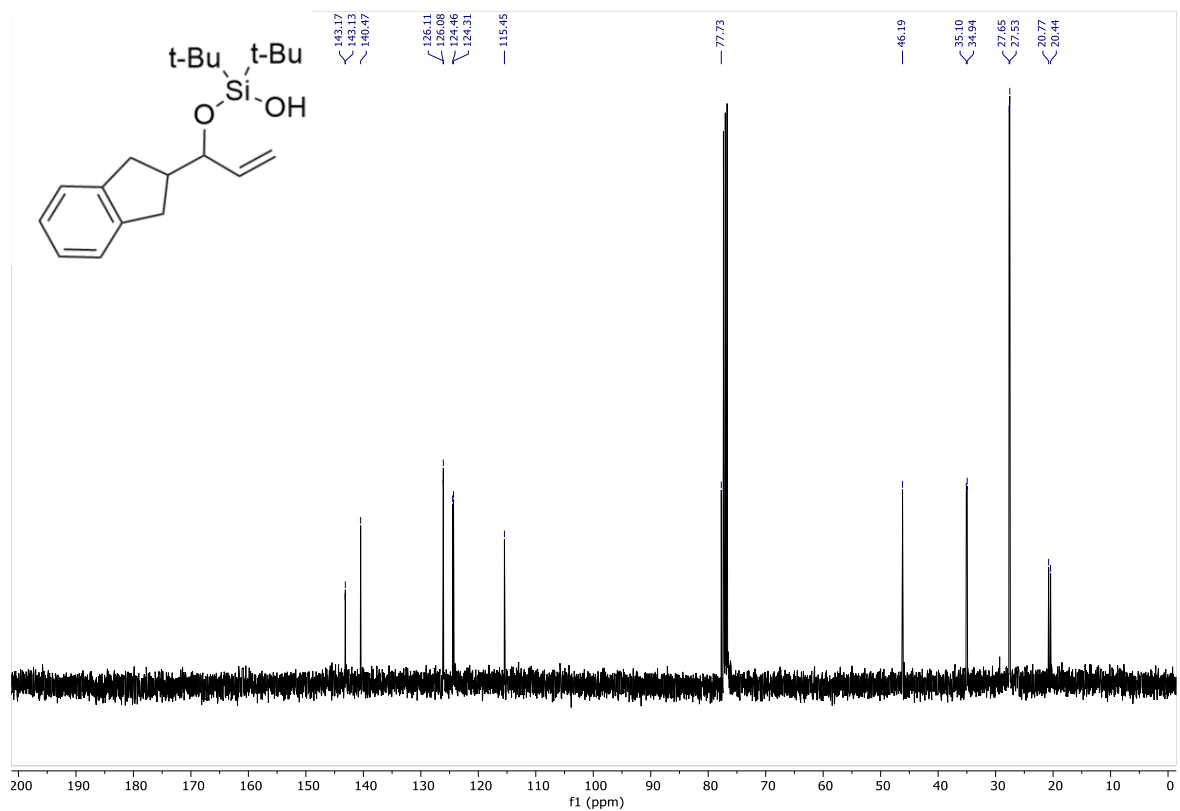



# Compound 55 (<sup>1</sup>H NMR: 400 MHz, <sup>13</sup>C NMR: 100 MHz)

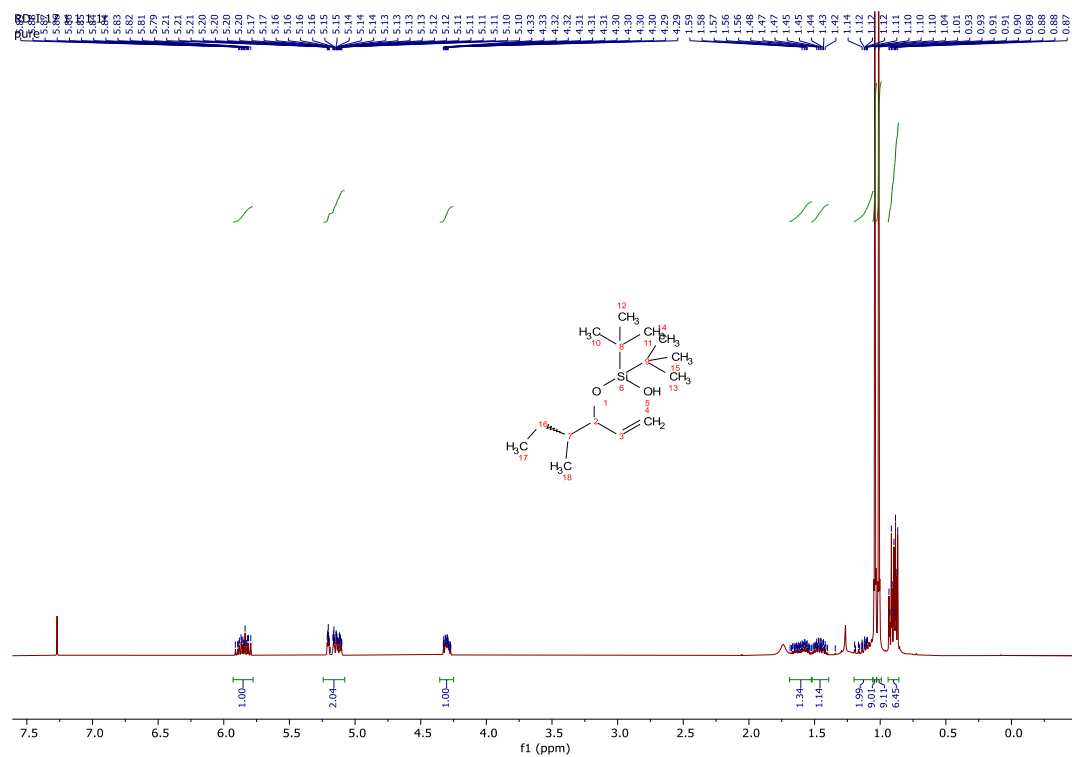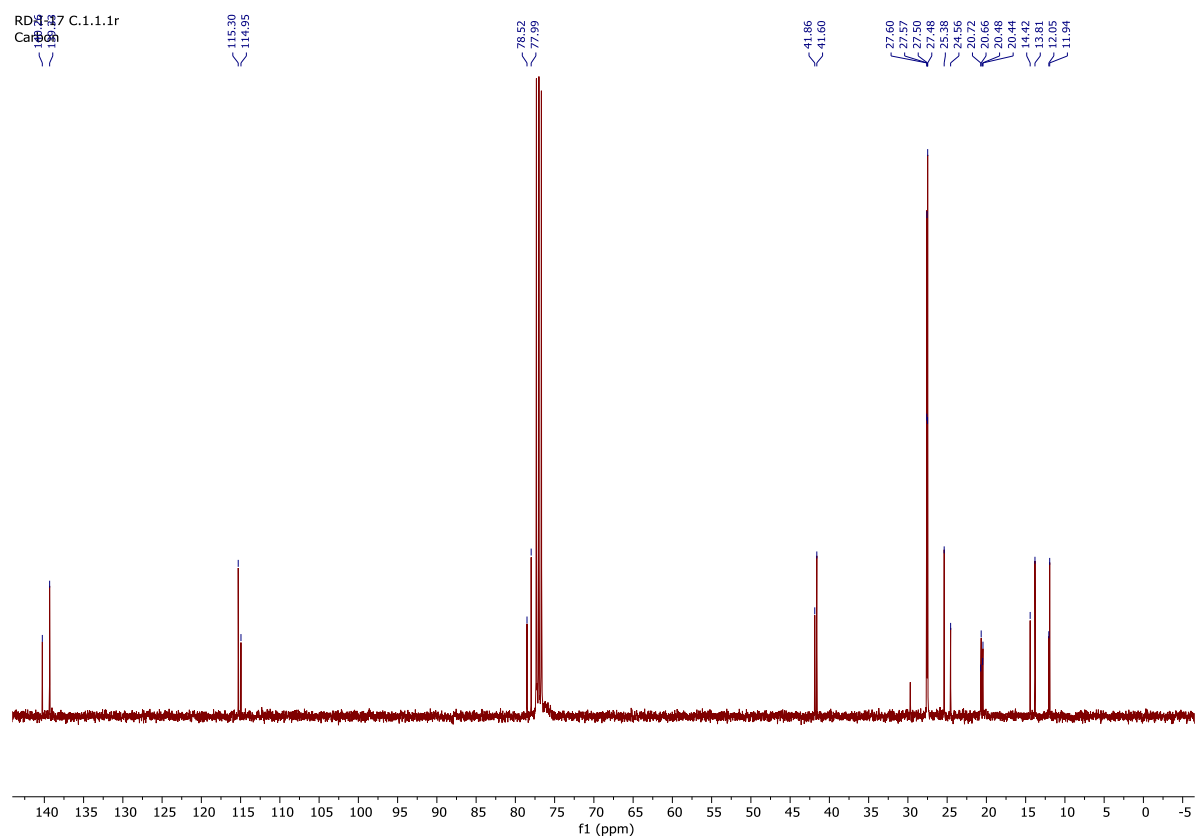

# Compound 55 isomer (<sup>1</sup>H NMR: 400 MHz, <sup>13</sup>C NMR: 100 MHz)

RD-I-12.1.1.1r  
Pure

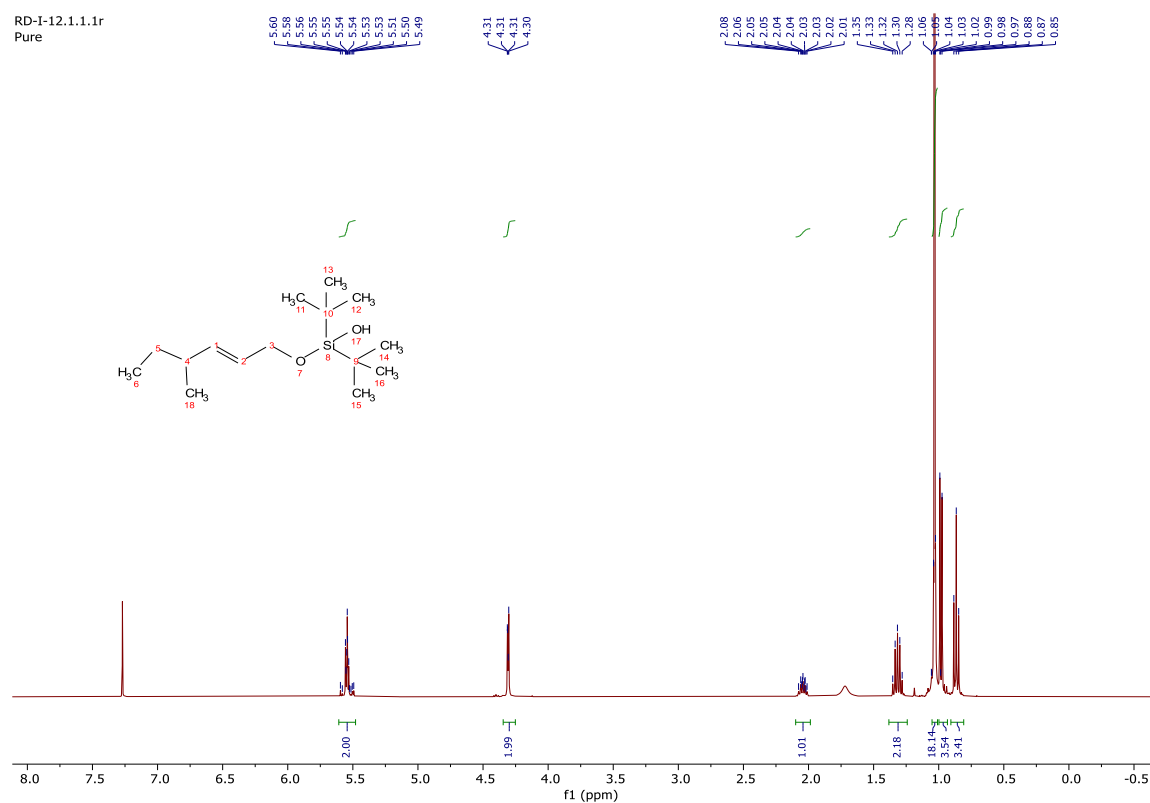

RD-I-12.1.1.1r  
Carbon

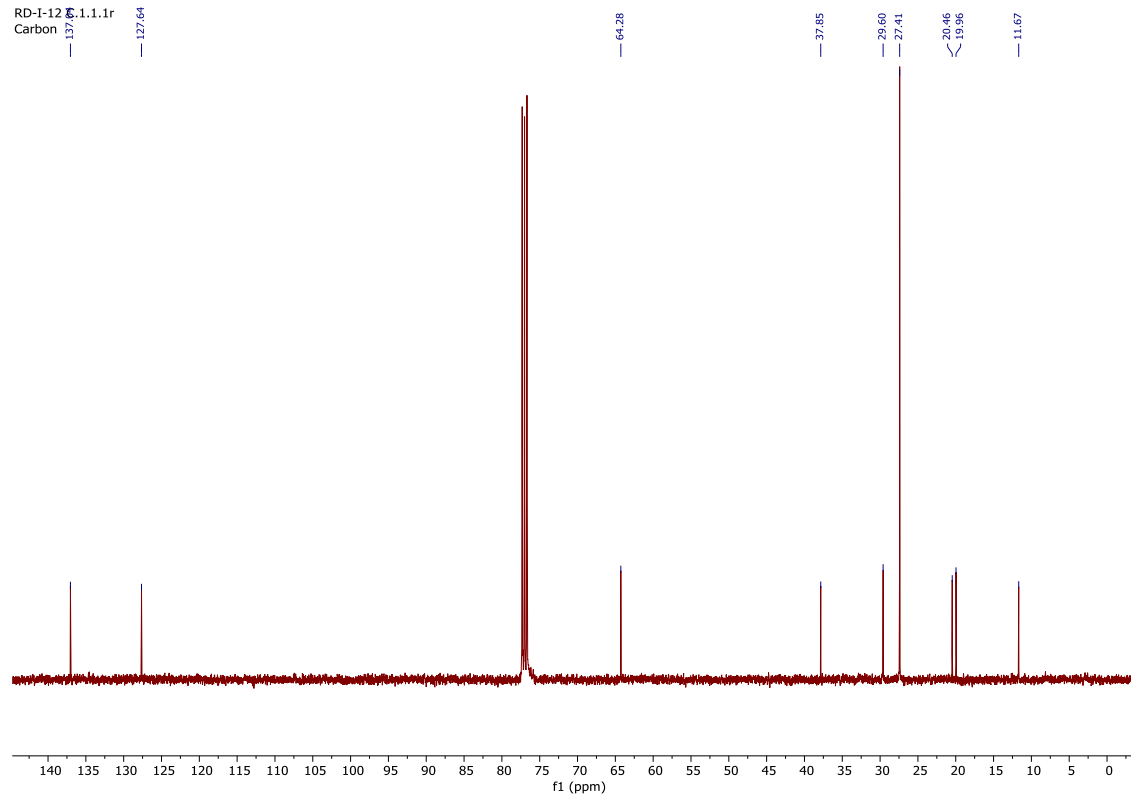

**1H NMR spectrum of compound 10 in CDCl<sub>3</sub>.**

**Chemical structure of 10:** CC(C)(C)[Si](O)(C=C)O[C@@H]1O[C@H](c2ccoc2)[C@H](O1)C3=CC=CC=C3

**1H NMR data (ppm):**

- 7.0 (s, 1H)
- 5.7-5.8 (m, 2H)
- 5.0-5.1 (m, 2H)
- 4.3-4.4 (m, 1H)
- 1.0-1.8 (m, 15H)

**Integration values:** 1.00, 2.04, 1.00, 5.34, 1.07, 4.96, 8.99, 1.31, 2.31.

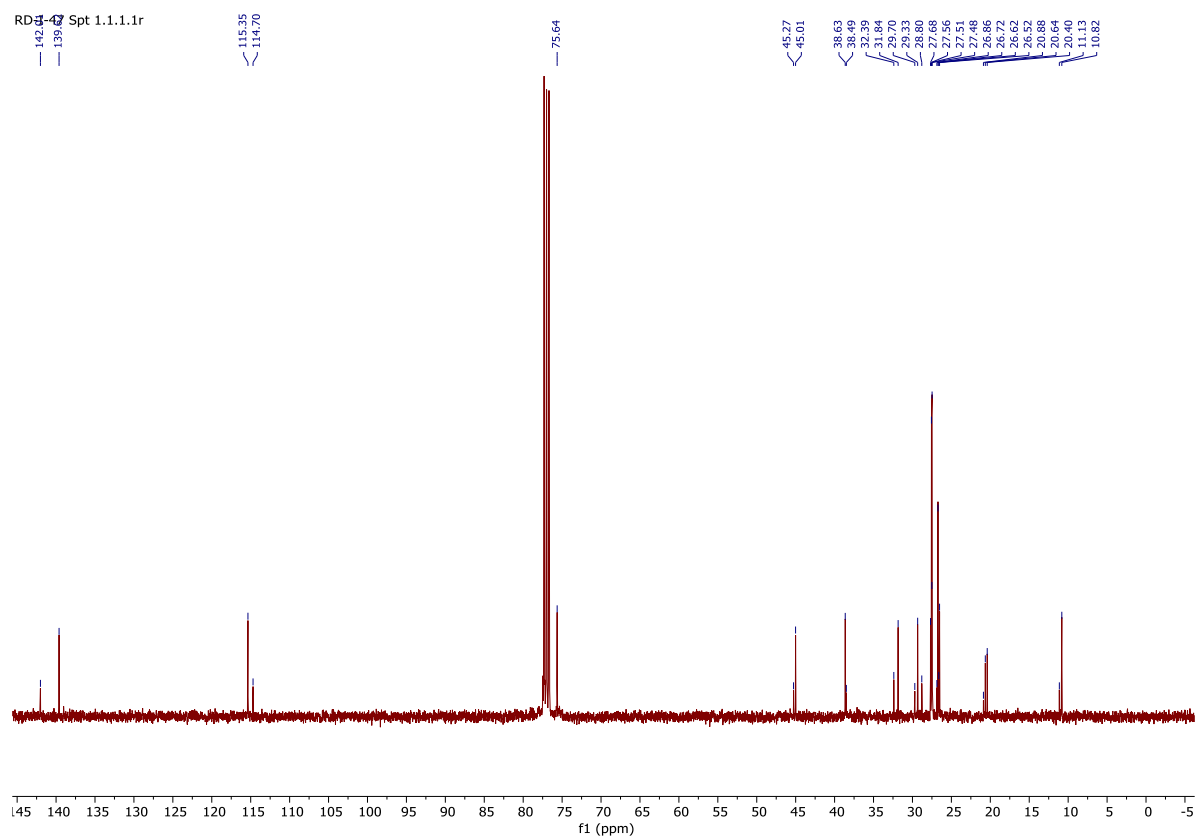

RD-I-37.1.1.1r  
PURE

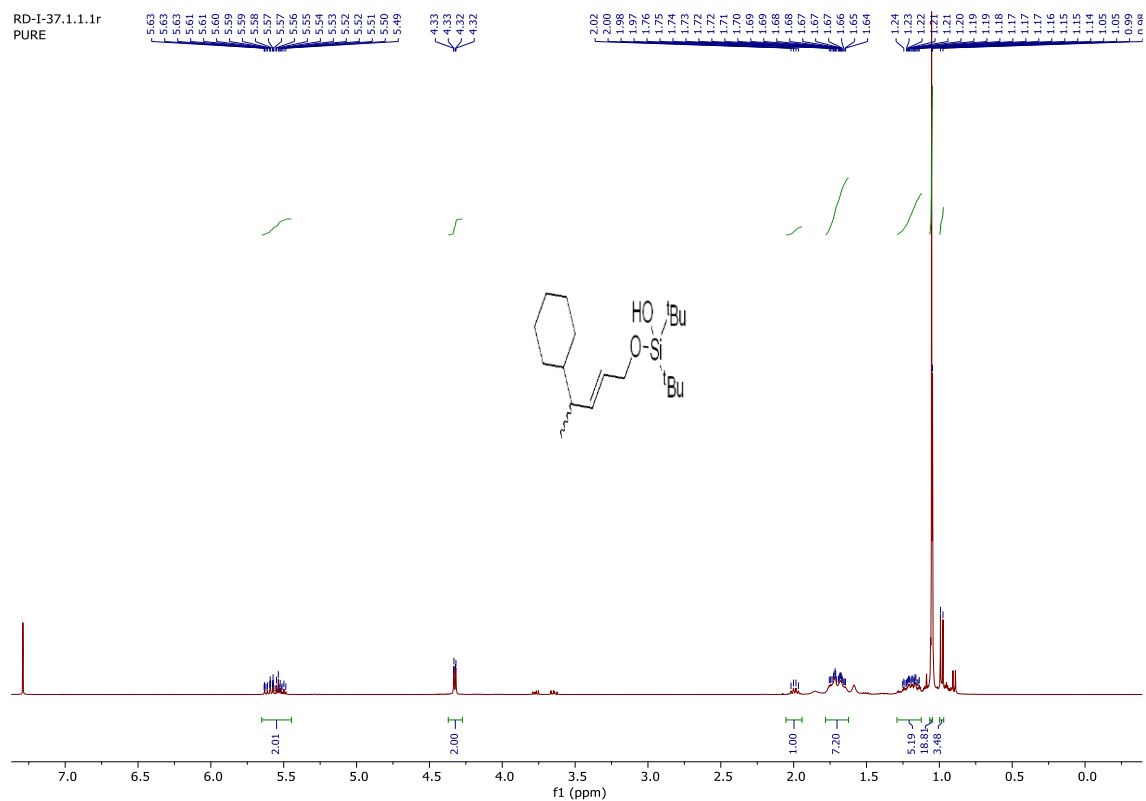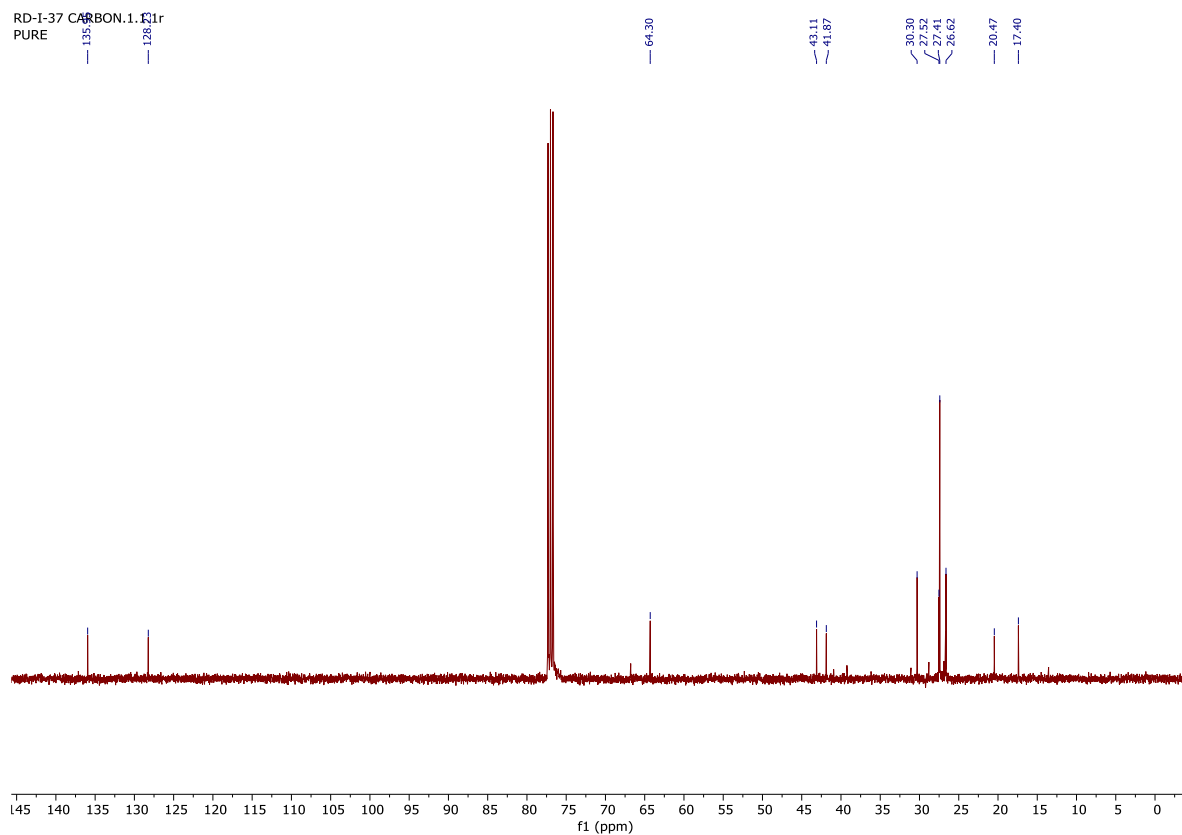

**Compound 57 (<sup>1</sup>H NMR: 400 MHz, <sup>13</sup>C NMR: 100 MHz)**

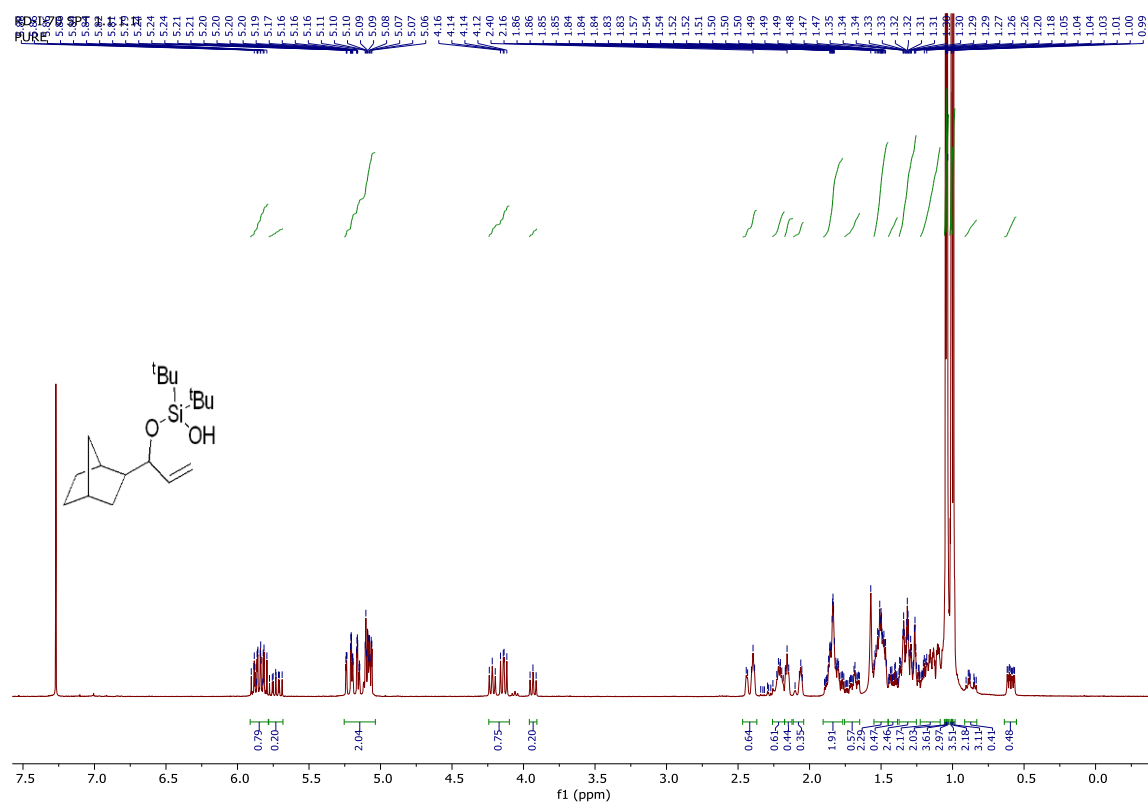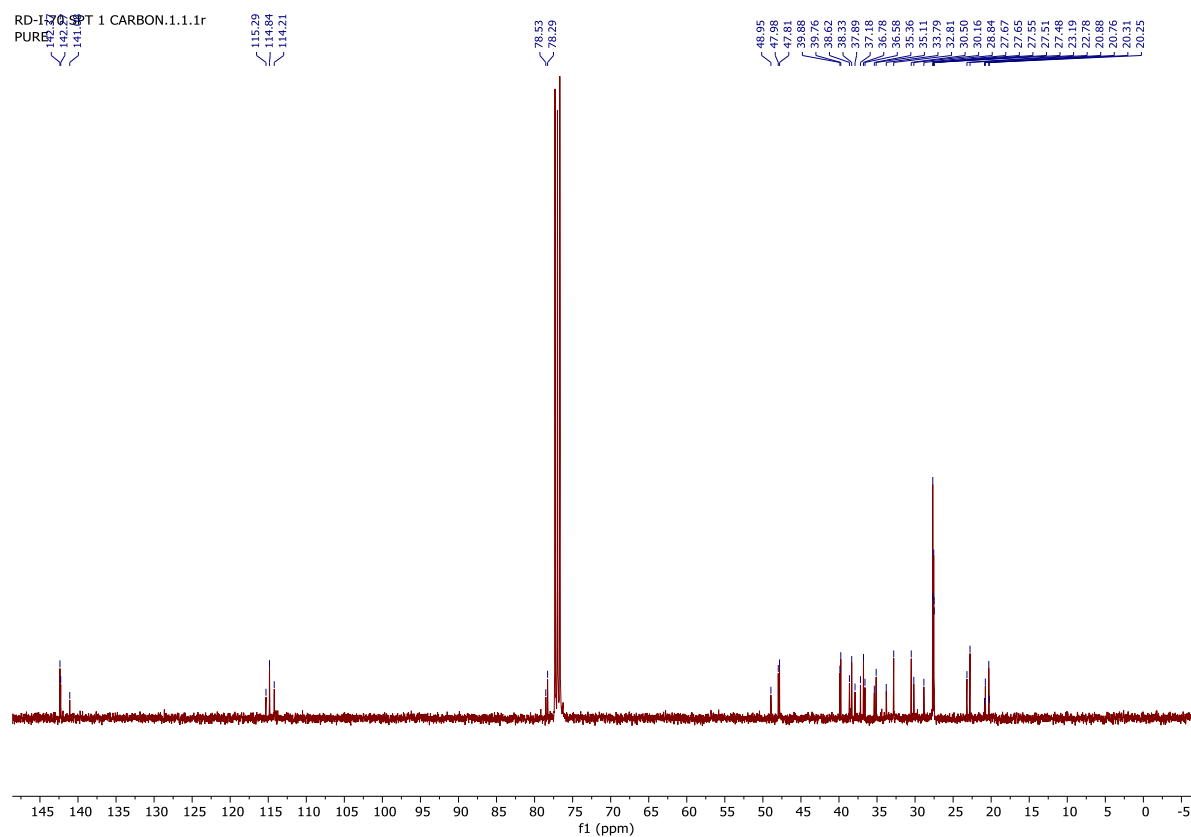

# Compound 57 isomer (<sup>1</sup>H NMR: 400 MHz, <sup>13</sup>C NMR: 100 MHz)

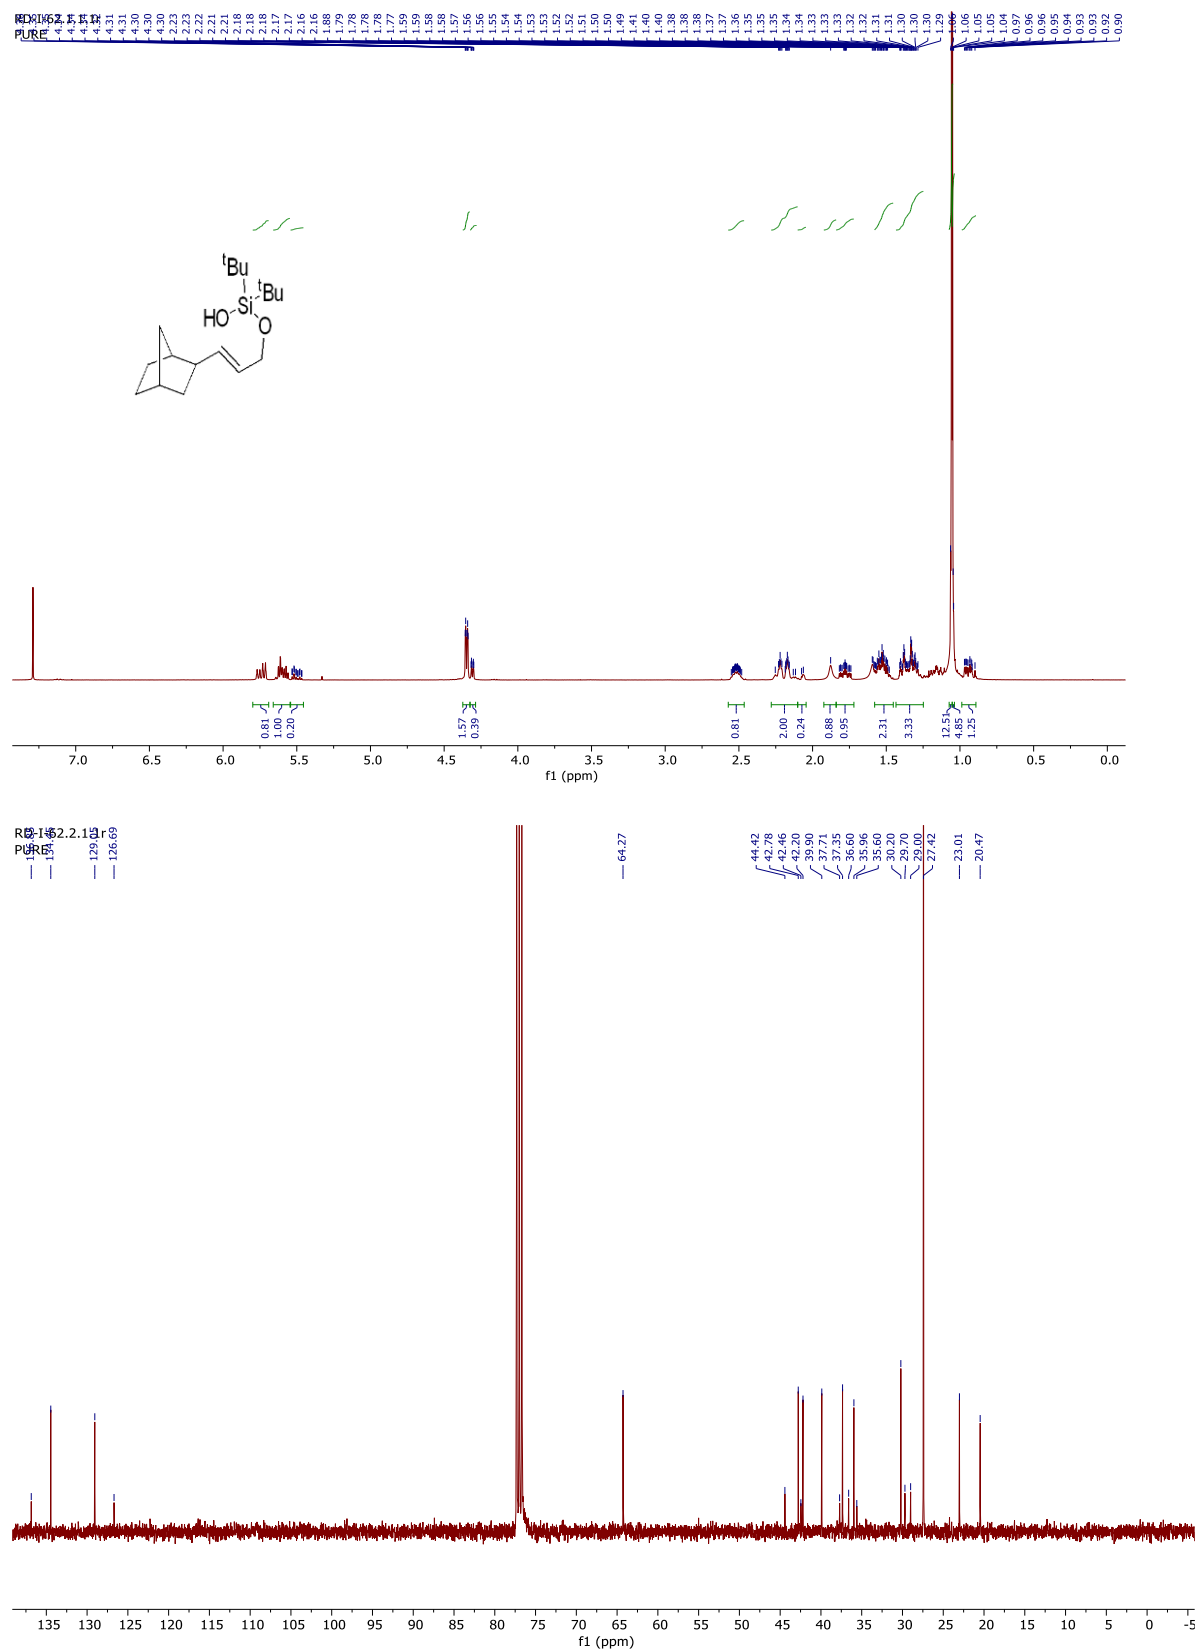

**Compound 58 ( $^1\text{H}$  NMR: 400 MHz,  $^{13}\text{C}$  NMR: 100 MHz)**

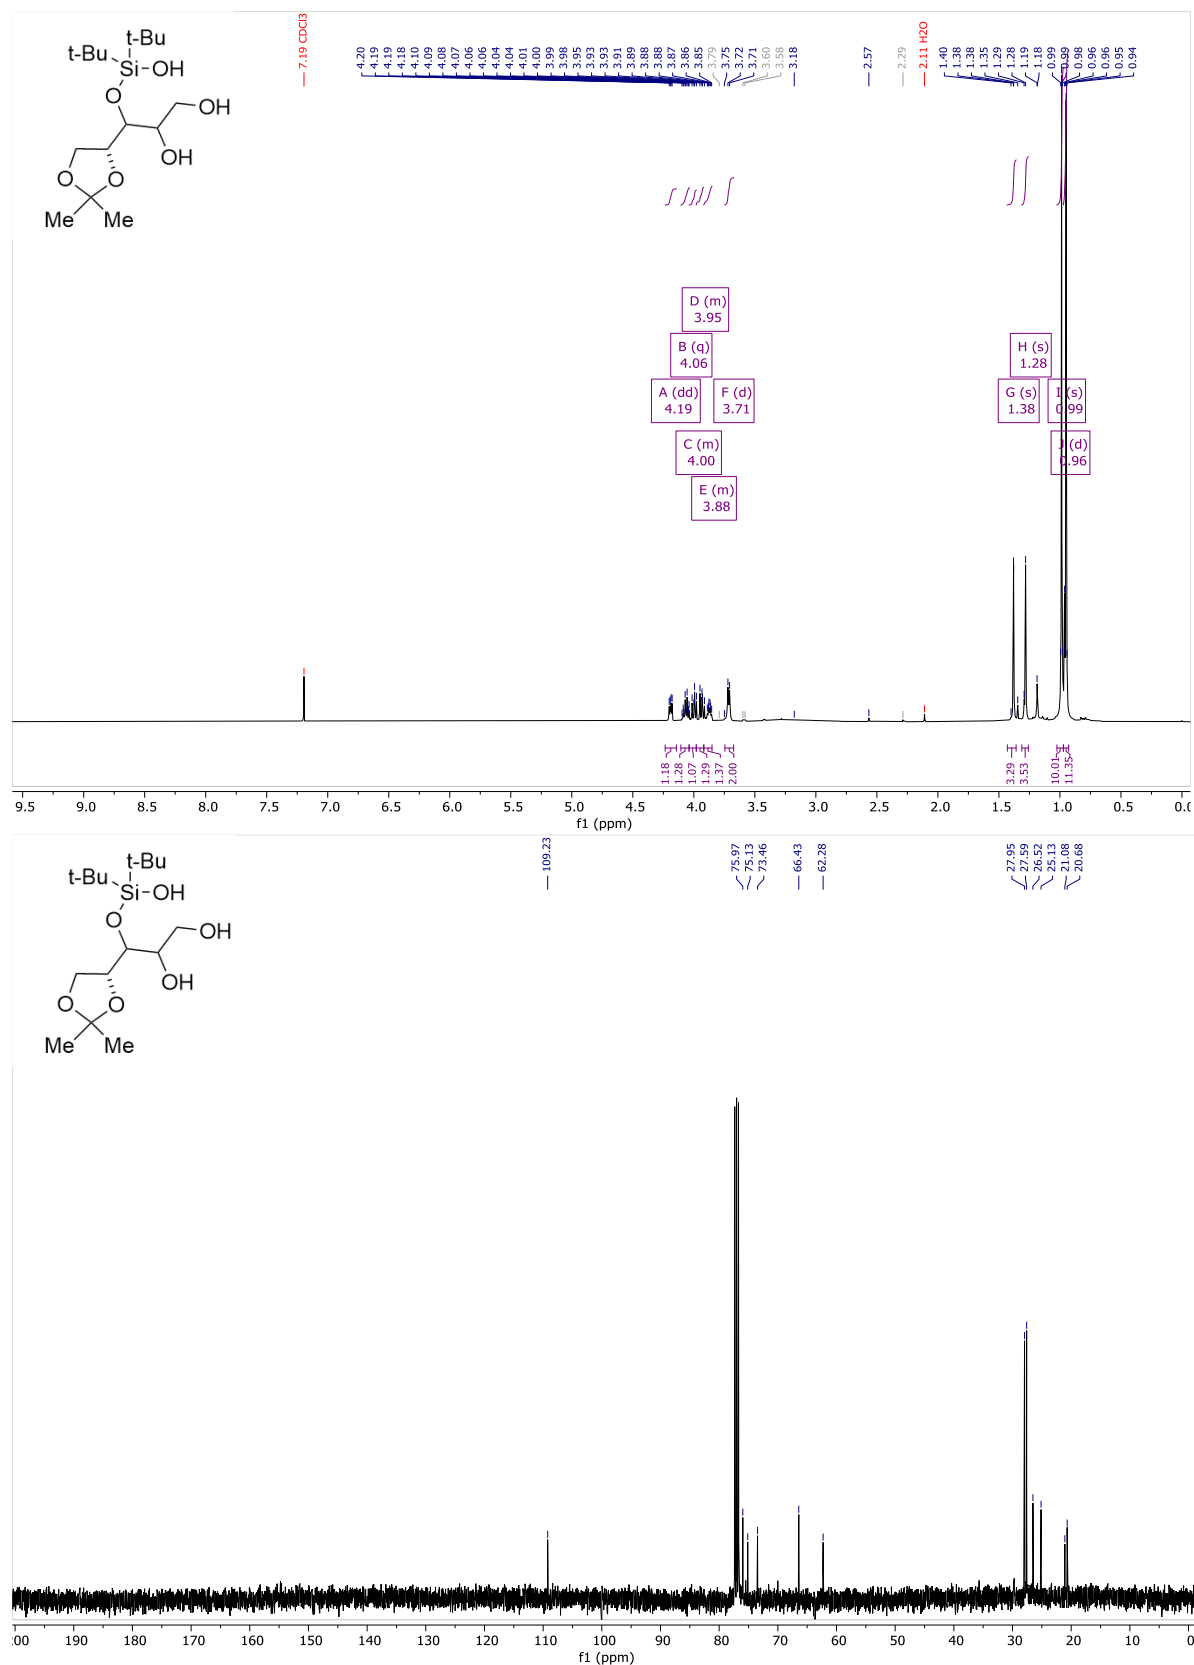

Supplement: s1 [file s1]
